# Supplementary material for: A Reusable FeCl3∙6H2O/Cationic 2,2′-Bipyridyl Catalytic System for Reduction of Nitroarenes in Water
Source: MDPI journal article supplement (doi:10.3390/catal12080924), 2022-08-21

## Supporting Information

### **A reusable FeCl<sub>3</sub>·6H<sub>2</sub>O/cationic 2,2'-bipyridyl catalytic system for reduction of nitroarenes in water**

Tsai-Yu Hung,<sup>†</sup> Wen-Sheng Peng,<sup>†</sup> Jing-Wen Tang, and Fu-Yu Tsai,<sup>\*</sup>

Institute of Organic and Polymeric Materials, National Taipei University of Technology, Taipei 106, Taiwan. E-mail: fuyutsai@ntut.edu.tw

<sup>†</sup> These authors contributed equally to this work.

#### **Table of Contents:**

|                                                                                        |     |
|----------------------------------------------------------------------------------------|-----|
| 1. <sup>1</sup> H and <sup>13</sup> C NMR spectral data for the reduction products     | S2  |
| 2. References                                                                          | S10 |
| 3. Copies of <sup>1</sup> H and <sup>13</sup> C NMR spectra for the reduction products | S12 |

## **<sup>1</sup>H and <sup>13</sup>C NMR spectral data for the reduction products**

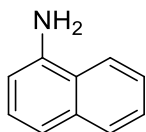

### **Naphthalen-1-amine (2a)<sup>1</sup>**

<sup>1</sup>H NMR (300 MHz, CDCl<sub>3</sub>)  $\delta$  7.82–7.78 (m, 2H), 7.46–7.43 (m, 2H), 7.31–7.27 (m, 2H), 6.79–6.76 (m, 1H), 4.12 (br, 2H); <sup>13</sup>C NMR (75 MHz, CDCl<sub>3</sub>)  $\delta$  142.0, 134.4, 128.5, 126.3, 125.8, 124.8, 123.6, 120.8, 119.0, 109.7.

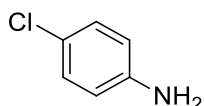

### **4-Chloroaniline (2b)<sup>2</sup>**

<sup>1</sup>H NMR (300 MHz, CDCl<sub>3</sub>)  $\delta$  7.08 (d,  $J$  = 8.4 Hz, 2H), 6.59 (d,  $J$  = 8.4 Hz, 2H), 3.63 (br, 2H); <sup>13</sup>C NMR (75 MHz, CDCl<sub>3</sub>)  $\delta$  144.9, 129.1, 123.1, 116.2.

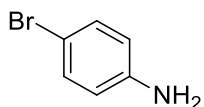

### **4-Bromoaniline (2c)<sup>2</sup>**

<sup>1</sup>H NMR (300 MHz, CDCl<sub>3</sub>)  $\delta$  7.21 (d,  $J$  = 8.8 Hz, 2H), 6.54 (d,  $J$  = 8.8 Hz, 2H), 3.65 (br, 2H); <sup>13</sup>C NMR (75 MHz, CDCl<sub>3</sub>)  $\delta$  145.4, 132.0, 116.7, 110.2.

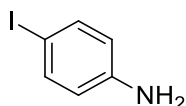

### **4-Iodoaniline (2d)<sup>3</sup>**

<sup>1</sup>H NMR (300 MHz, CDCl<sub>3</sub>)  $\delta$  7.38 (d,  $J$  = 8.7 Hz, 2H), 6.44 (d,  $J$  = 8.7 Hz, 2H), 3.67 (br, 2H); <sup>13</sup>C NMR (75 MHz, CDCl<sub>3</sub>)  $\delta$  146.0, 137.9, 117.3, 79.3.

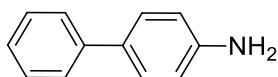

**[1,1'-Biphenyl]-4-amine (2e)<sup>4</sup>**

<sup>1</sup>H NMR (300 MHz, CDCl<sub>3</sub>)  $\delta$  7.50 (d,  $J$  = 8.2 Hz, 2H), 7.47–7.32 (m, 4H), 7.24–7.19 (m, 1H), 6.71 (d,  $J$  = 8.6 Hz, 2H), 3.67 (br, 2H); <sup>13</sup>C NMR (75 MHz, CDCl<sub>3</sub>)  $\delta$  145.8, 141.1, 131.6, 128.6, 128.0, 126.4, 126.2, 115.4.

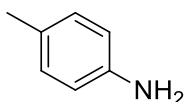

***p*-Toluidine (2f)<sup>5</sup>**

<sup>1</sup>H NMR (300 MHz, CDCl<sub>3</sub>)  $\delta$  6.95 (d,  $J$  = 8.2 Hz, 2H), 6.59 (d,  $J$  = 8.2 Hz, 2H), 3.51 (br, 2H), 2.22 (s, 3H); <sup>13</sup>C NMR (75 MHz, CDCl<sub>3</sub>)  $\delta$  143.7, 129.7, 127.7, 115.2, 20.4.

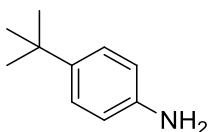

**4-(*tert*-Butyl)aniline (2g)<sup>6</sup>**

<sup>1</sup>H NMR (300 MHz, CDCl<sub>3</sub>)  $\delta$  7.17 (d,  $J$  = 8.5 Hz, 2H), 6.63 (d,  $J$  = 8.5 Hz, 2H), 3.53 (br, 2H), 1.26 (s, 9H); <sup>13</sup>C NMR (75 MHz, CDCl<sub>3</sub>)  $\delta$  143.7, 141.4, 126.0, 114.9, 33.9, 31.5.

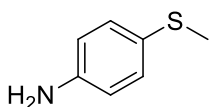

**4-(Methylthio)aniline (2h)<sup>7</sup>**

<sup>1</sup>H NMR (300 MHz, CDCl<sub>3</sub>)  $\delta$  7.16 (d,  $J$  = 8.6 Hz, 2H), 6.61 (d,  $J$  = 8.6 Hz, 2H), 3.64 (br, 2H), 2.39 (s, 3H); <sup>13</sup>C NMR (75 MHz, CDCl<sub>3</sub>)  $\delta$  145.1, 131.0, 125.8, 115.7, 18.8.

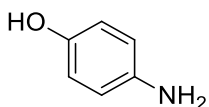

#### 4-Aminophenol (2i)<sup>5</sup>

<sup>1</sup>H NMR (300 MHz, DMSO-*d*<sub>6</sub>)  $\delta$  8.32 (s, 1H), 6.45 (d, *J* = 8.9 Hz, 2H), 6.39 (d, *J* = 8.9 Hz, 2H), 4.38 (br, 2H); <sup>13</sup>C NMR (75 MHz, DMSO-*d*<sub>6</sub>)  $\delta$  148.2, 140.7, 115.5, 115.2.

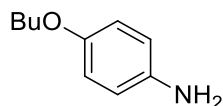

#### 4-Butoxyaniline (2j)<sup>8</sup>

<sup>1</sup>H NMR (300 MHz, CDCl<sub>3</sub>)  $\delta$  6.72 (d, *J* = 8.8 Hz, 2H), 6.61 (d, *J* = 8.8 Hz, 2H), 3.87 (t, *J* = 6.5 Hz, 2H), 3.17 (br, 2H), 1.75–1.66 (m, 2H), 1.52–1.42 (m, 2H), 0.94 (t, *J* = 7.4 Hz, 3H); <sup>13</sup>C NMR (75 MHz, CDCl<sub>3</sub>)  $\delta$  152.4, 139.8, 116.4, 115.7, 68.4, 31.5, 19.2, 13.8.

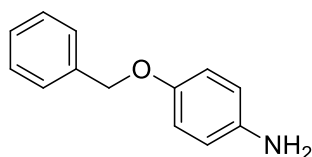

#### 4-(Benzyloxy)aniline (2k)<sup>9</sup>

<sup>1</sup>H NMR (300 MHz, CDCl<sub>3</sub>)  $\delta$  7.42–7.26 (m, 5H), 6.80 (d, *J* = 8.9 Hz, 2H), 6.62 (d, *J* = 8.9 Hz, 2H), 4.97 (s, 2H), 3.40 (br, 2H); <sup>13</sup>C NMR (75 MHz, CDCl<sub>3</sub>)  $\delta$  152.0, 140.2, 137.5, 128.5, 127.8, 127.5, 116.4, 116.1, 70.8.

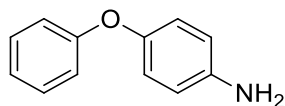

#### 4-Phenoxyaniline (2l)<sup>10</sup>

<sup>1</sup>H NMR (300 MHz, CDCl<sub>3</sub>)  $\delta$  7.27–7.21 (m, 2H), 6.97 (t, *J* = 7.4 Hz, 1H), 6.89 (d, *J* = 7.7 Hz, 2H), 6.84 (d, *J* = 8.8 Hz, 2H), 6.64 (d, *J* = 8.8 Hz, 2H), 3.54 (br, 2H); <sup>13</sup>C NMR (75 MHz, CDCl<sub>3</sub>)  $\delta$  158.9, 148.6, 142.6, 129.5, 122.0, 121.1, 117.2, 116.2.

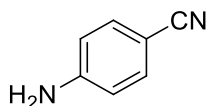

**4-Aminobenzonitrile (2m)<sup>5</sup>**

<sup>1</sup>H NMR (300 MHz, CDCl<sub>3</sub>)  $\delta$  7.39 (d,  $J$  = 8.6 Hz, 2H), 6.62 (d,  $J$  = 8.6 Hz, 2H), 4.13 (br, 2H); <sup>13</sup>C NMR (75 MHz, CDCl<sub>3</sub>)  $\delta$  150.3, 133.8, 120.1, 114.4, 100.1.

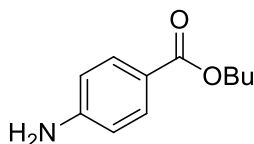

**Butyl 4-aminobenzoate (2n)<sup>11</sup>**

<sup>1</sup>H NMR (300 MHz, CDCl<sub>3</sub>)  $\delta$  7.83 (d,  $J$  = 8.5 Hz, 2H), 6.62 (d,  $J$  = 8.5 Hz, 2H), 4.24 (t,  $J$  = 6.6 Hz, 2H), 4.01 (br, 2H), 1.75–1.66 (m, 2H), 1.51–1.38 (m, 2H), 0.95 (t,  $J$  = 7.4 Hz, 3H); <sup>13</sup>C NMR (75 MHz, CDCl<sub>3</sub>)  $\delta$  166.8, 150.7, 131.5, 120.0, 113.7, 64.2, 30.8, 19.3, 13.8.

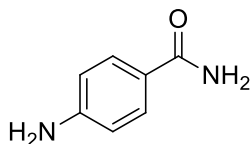

**4-Aminobenzamide (2o)<sup>10</sup>**

<sup>1</sup>H NMR (300 MHz, DMSO-*d*<sub>6</sub>)  $\delta$  7.56 (d,  $J$  = 8.6 Hz, 2H), 7.50 (br, 1H), 6.80 (br, 1H), 6.50 (d,  $J$  = 8.6 Hz, 2H), 5.57 (br, 2H); <sup>13</sup>C NMR (75 MHz, DMSO-*d*<sub>6</sub>)  $\delta$  168.1, 151.7, 129.2, 120.9, 112.5.

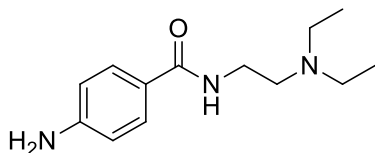

**Procainamide (2p)<sup>12</sup>**

<sup>1</sup>H NMR (300 MHz, CDCl<sub>3</sub>)  $\delta$  7.58 (d,  $J$  = 8.6 Hz, 2H), 6.79 (br, 1H), 6.62 (d,  $J$  = 8.6 Hz, 2H), 3.96 (br, 2H), 3.45–3.39 (m, 2H), 2.61–2.57 (m, 2H), 2.56–2.49 (m, 4H), 1.00 (t,  $J$  = 7.1 Hz, 6H); <sup>13</sup>C NMR (75 MHz, CDCl<sub>3</sub>)  $\delta$  167.1, 149.4, 128.5, 124.2, 114.1, 51.4, 46.7, 37.1, 11.9.

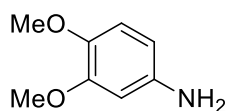

**3,4-Dimethoxyaniline (2q)**<sup>13</sup>

<sup>1</sup>H NMR (300 MHz, CDCl<sub>3</sub>)  $\delta$  6.68 (d,  $J$  = 8.4 Hz, 1H), 6.29 (d,  $J$  = 2.6 Hz, 1H), 6.21 (dd,  $J$  = 8.4, 2.6 Hz, 1H), 3.81 (s, 3H), 3.78 (s, 3H), 3.11 (br, 2H); <sup>13</sup>C NMR (75 MHz, CDCl<sub>3</sub>)  $\delta$  149.8, 142.1, 140.5, 112.9, 106.3, 100.6, 56.5, 55.7.

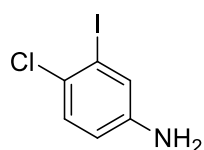

**4-Chloro-3-iodoaniline (2r)**<sup>14</sup>

<sup>1</sup>H NMR (300 MHz, CDCl<sub>3</sub>)  $\delta$  7.16–7.13 (m, 2H), 6.57 (dd,  $J$  = 8.6, 2.7 Hz, 1H), 3.64 (br, 2H); <sup>13</sup>C NMR (75 MHz, CDCl<sub>3</sub>)  $\delta$  145.8, 129.3, 127.3, 125.8, 116.2, 98.3.

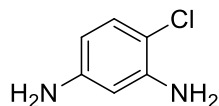

**4-Chlorobenzene-1,3-diamine (2s)**<sup>15</sup>

<sup>1</sup>H NMR (300 MHz, CDCl<sub>3</sub>)  $\delta$  6.97 (d,  $J$  = 8.3 Hz, 1H), 6.07–6.02 (m, 2H), 3.87 (br, 2H), 3.58 (br, 2H); <sup>13</sup>C NMR (75 MHz, CDCl<sub>3</sub>)  $\delta$  146.1, 143.4, 129.8, 109.2, 106.7, 102.2.

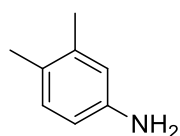

**3,4-Dimethylaniline (2t)**<sup>16</sup>

<sup>1</sup>H NMR (300 MHz, CDCl<sub>3</sub>)  $\delta$  6.90 (d,  $J$  = 7.8 Hz, 1H), 6.51 (d,  $J$  = 2.4 Hz, 1H), 6.44 (dd,  $J$  = 7.9, 2.4 Hz, 1H), 3.46 (br, 2H), 2.16 (s, 3H), 2.14 (s, 3H); <sup>13</sup>C NMR (75 MHz, CDCl<sub>3</sub>)  $\delta$  144.1, 137.3, 130.2, 126.5, 116.8, 112.6, 19.8, 18.7.

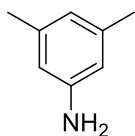

**3,5-Dimethylaniline (2u)**<sup>17</sup>

<sup>1</sup>H NMR (300 MHz, CDCl<sub>3</sub>)  $\delta$  6.41 (s, 1H), 6.33 (s, 2H), 3.54 (br, 2H), 2.22 (s, 6H); <sup>13</sup>C NMR (75 MHz, CDCl<sub>3</sub>)  $\delta$  146.3, 139.0, 120.5, 113.1, 21.3.

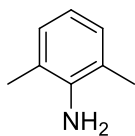

**2,6-Dimethylaniline (2v)**<sup>18</sup>

<sup>1</sup>H NMR (300 MHz, CDCl<sub>3</sub>)  $\delta$  6.93 (d,  $J$  = 7.5 Hz, 2H), 6.63 (t,  $J$  = 7.5 Hz, 1H), 3.56 (br, 2H), 2.17 (s, 6H); <sup>13</sup>C NMR (75 MHz, CDCl<sub>3</sub>)  $\delta$  142.7, 128.2, 121.6, 117.9, 17.6.

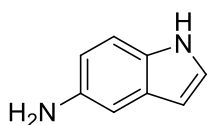

**1H-indol-5-amine (2w)**<sup>19</sup>

<sup>1</sup>H NMR (300 MHz, CDCl<sub>3</sub>)  $\delta$  7.93 (br, 1H), 7.18 (d,  $J$  = 8.6 Hz, 1H), 7.11 (t,  $J$  = 2.8 Hz, 1H), 6.93 (d,  $J$  = 2.1 Hz, 1H), 6.65 (dd,  $J$  = 8.5, 2.2 Hz, 1H), 6.36 (s, 1H), 3.49 (br, 2H); <sup>13</sup>C NMR (75 MHz, CDCl<sub>3</sub>)  $\delta$  139.5, 130.6, 128.7, 124.7, 112.9, 111.5, 105.5, 101.5.

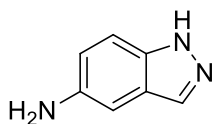

**1H-indazol-5-amine (2x)**<sup>2</sup>

<sup>1</sup>H NMR (300 MHz, DMSO-*d*<sub>6</sub>)  $\delta$  12.55 (br, 1H), 7.70 (s, 1H), 7.22 (d,  $J$  = 8.7 Hz, 1H), 6.77–6.73 (m, 2H), 4.74 (br, 2H); <sup>13</sup>C NMR (75 MHz, DMSO-*d*<sub>6</sub>)  $\delta$  142.3, 134.5, 131.5, 123.9, 118.1, 110.2, 100.4.

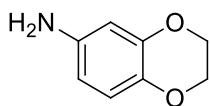

**1,4-Benzodioxan-6-amine (2y)**<sup>20</sup>

<sup>1</sup>H NMR (300 MHz, CDCl<sub>3</sub>)  $\delta$  6.65 (d,  $J$  = 8.4 Hz, 1H), 6.22 (d,  $J$  = 2.6 Hz, 1H), 6.18 (dd,  $J$  = 8.4, 2.6 Hz, 1H), 4.22–4.19 (m, 2H), 4.17–4.14 (m, 2H), 3.36 (br, 2H); <sup>13</sup>C NMR (75 MHz, CDCl<sub>3</sub>)  $\delta$  143.8, 140.7, 136.4, 117.5, 108.6, 104.1, 64.6, 64.1.

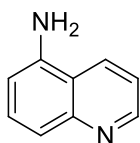

**Quinolin-5-amine (2z)**<sup>21</sup>

<sup>1</sup>H NMR (300 MHz, CDCl<sub>3</sub>)  $\delta$  8.86 (dd,  $J$  = 4.1, 1.4 Hz, 1H), 8.15 (d,  $J$  = 8.5 Hz, 1H), 7.53–7.48 (m, 2H), 7.33–7.32 (m, 1H), 6.79 (dd,  $J$  = 7.3, 0.9 Hz, 1H), 4.20 (br, 2H); <sup>13</sup>C NMR (75 MHz, CDCl<sub>3</sub>)  $\delta$  150.1, 149.0, 142.3, 130.0, 129.5, 120.0, 119.5, 118.6, 109.9.

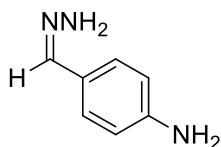

**4-(hydrazonomethyl)aniline (4a)**<sup>22</sup>

<sup>1</sup>H NMR (300 MHz, Acetone-*d*<sub>6</sub>)  $\delta$  8.44 (s, 1H), 7.57 (d,  $J$  = 8.6 Hz, 2H), 6.71 (d,  $J$  = 8.6 Hz, 2H), 5.21 (br, 2H), 2.88 (s, 2H); <sup>13</sup>C NMR (75 MHz, Acetone-*d*<sub>6</sub>)  $\delta$  160.9, 152.3, 130.7, 124.1, 114.8.

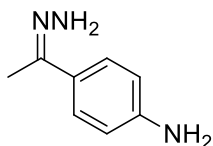

**4-(1-hydrazonoethyl)aniline (4b)**<sup>22</sup>

<sup>1</sup>H NMR (300 MHz, CDCl<sub>3</sub>)  $\delta$  7.74 (d,  $J$  = 8.6 Hz, 2H), 6.67 (d,  $J$  = 8.6 Hz, 2H), 3.84 (br, 2H), 2.29 (s, 3H); <sup>13</sup>C NMR (75 MHz, CDCl<sub>3</sub>)  $\delta$  158.0, 147.8, 129.0, 127.9, 114.4, 14.5.



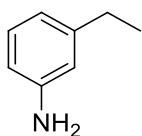

**3-Ethylaniline (4c')<sup>23</sup>**

<sup>1</sup>H NMR (300 MHz, CDCl<sub>3</sub>) δ 7.07 (t, *J* = 7.6 Hz, 1H), 6.61 (d, *J* = 8.0 Hz, 1H), 6.54–6.53 (m, 2H), 3.60 (br, 2H), 2.60–2.52 (m, 2H), 1.21 (t, *J* = 7.6 Hz, 3H); <sup>13</sup>C NMR (75 MHz, CDCl<sub>3</sub>) δ 146.3, 145.5, 129.2, 118.2, 114.7, 112.5, 28.8, 15.5.

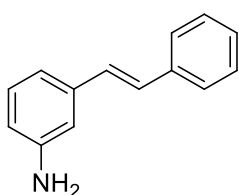

**(*E*)-3-Styrylaniline (4d)<sup>24</sup>**

<sup>1</sup>H NMR (300 MHz, CDCl<sub>3</sub>) δ 7.50–7.47 (m, 2H), 7.36–7.31 (m, 2H), 7.26–7.21 (m, 1H), 7.14 (t, *J* = 7.8 Hz, 1H), 7.03 (d, *J* = 2.9 Hz, 2H), 6.93–6.90 (m, 1H), 6.84–6.83 (m, 1H), 6.61–6.57 (m, 1H), 3.67 (br, 2H); <sup>13</sup>C NMR (75 MHz, CDCl<sub>3</sub>) δ 146.6, 138.2, 137.2, 129.5, 128.7, 128.6, 128.4, 127.4, 126.4, 117.2, 114.6, 112.8.

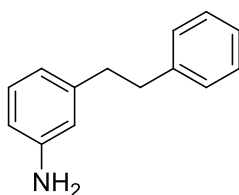

**3-Phenethylaniline (4d')<sup>25</sup>**

<sup>1</sup>H NMR (300 MHz, CDCl<sub>3</sub>) δ 7.34–7.29 (m, 2H), 7.24–7.21 (m, 3H), 7.13–7.08 (m, 1H), 6.64 (d, *J* = 7.6 Hz, 1H), 6.56–6.54 (m, 2H), 3.60 (br, 2H), 2.96–2.90 (m, 2H), 2.88–2.82 (m, 2H); <sup>13</sup>C NMR (75 MHz, CDCl<sub>3</sub>) δ 146.3, 143.0, 141.9, 129.2, 128.4, 128.3, 125.8, 118.7, 115.2, 112.7, 37.9, 37.7.

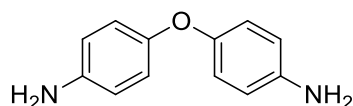

#### 4,4'-Oxydianiline (6a)<sup>24</sup>

<sup>1</sup>H NMR (300 MHz, CDCl<sub>3</sub>)  $\delta$  6.78 (d,  $J$  = 8.8 Hz, 4H), 6.62 (d,  $J$  = 8.8 Hz, 4H), 3.49 (br, 4H); <sup>13</sup>C NMR (75 MHz, CDCl<sub>3</sub>)  $\delta$  150.6, 141.7, 119.5, 116.2.

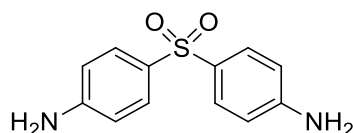

#### 4,4'-Sulfonyldianiline / 4,4'-Dapsone (6b)<sup>26</sup>

<sup>1</sup>H NMR (300 MHz, Acetone-*d*<sub>6</sub>)  $\delta$  7.55 (d,  $J$  = 8.7 Hz, 4H), 6.70 (d,  $J$  = 8.7 Hz, 4H), 5.43 (br, 4H); <sup>13</sup>C NMR (75 MHz, Acetone-*d*<sub>6</sub>)  $\delta$  153.4, 131.2, 129.8, 114.2.

## References

1. Liu, X.; Zhao, X.; Zhou, M.; Cao, Y.; Wu, H.; Zhu, J. *Eur. J. Inorg. Chem.* **2016**, 3338.
2. Lu, H.; Geng, Z.; Li, J.; Zou, D.; Wu, Y.; Wu, Y. *Org. Lett.* **2016**, 18, 2774.
3. Udumula, V.; Tyler, J. H.; Davis, D. A.; Wang, H.; Linford, M. R.; Minson, P. S.; Michaelis, D. *J. ACS Catal.* **2015**, 5, 3457.
4. Keyhaniyan, M.; Shiri, A.; Eshghi, H.; Khojastehnezhad, A. *New J. Chem.*, **2018**, 42, 19433.
5. Göksu, H. *New J. Chem.* **2015**, 39, 8498.
6. Chao, C.-G.; Bergbreiter, D. E. *Catal. Commun.* **2016**, 77, 89.
7. Fang, X.-L.; Tang, R.-Y.; Zhang, X.-G.; Li, J.-H. *Synthesis* **2011**, 1099.
8. Chen, Z.; Jiang, Y.; Zhang, L.; Guo, Y.; Ma, D. *J. Am. Chem. Soc.* **2019**, 141, 3541.
9. Sharma, U.; Verma, P. K.; Kumar, N.; Kumar, V.; Bala, M.; Singh, B. *Chem. Eur. J.* **2011**, 17, 5903.
10. Hu, Z.; Zhou, J.; Ai, Y.; Liu, L.; Qi, L.; Jiang, R.; Bao, H.; Wang, J.; Hu, J.; Sun, H.-b.; Liang, Q. *J. Catal.* **2018**, 368, 20.

11. Hosangadi, B. D.; Dave, R. H. *Tetrahedron Lett.* **1996**, *37*, 6375.
12. Kelly, S. M.; Lipshutz, B. H. *Org. Lett.* **2014**, *16*, 98.
13. van Kalker, H. A.; Bruins, J. J.; Rutjes, F. P. J. T.; van Delft, F. L. *Adv. Synth. Catal.* **2012**, *354*, 1417.
14. Dichiarante, V.; Salvaneschi, A.; Protti, S.; Dondi, D.; Fagnoni, M.; Albini, A. *J. Am. Chem. Soc.* **2007**, *129*, 15919.
15. Cui, X.; Zhou, X.; Dong, Z. *Catal. Commun.* **2018**, *107*, 57.
16. Chen, X.; Zhou, X.-Y.; Wu, H.; Lei, Y.-Z.; Li, J.-H. *Synth. Commun.* **2018**, *48*, 2475.
17. Meng, F.; Zhu, X.; Li, Y.; Xie, J.; Wang, B.; Yao, J.; Wan, Y. *Eur. J. Org. Chem.* **2010**, 6149.
18. Li, Y.; Zhu, X.; Meng, F.; Wan, Y. *Tetrahedron* **2011**, *67*, 5450.
19. Choy, J.; Jaime-Figueroa, S.; Jiang, L.; Wagner, P. *Synth. Commun.* **2008**, *38*, 3840.
20. Golub, A. G.; Yakovenko, O. Y.; Bdzhola, V. G.; Sapelkin, V. M.; Zien, P.; Yarmoluk, S. M. *J. Med. Chem.* **2006**, *49*, 6443.
21. Ghosh, B.; Antonio, T.; Zhen, J.; Kharkar, P.; Reith, M. E. A.; Dutta, A. K. *J. Med. Chem.* **2010**, *53*, 1023.
22. Lin, S.-C. A.; Liu, Y.-H.; Peng, S.-M.; Liu, S.-T. *Mol. Catal.* **2019**, *466*, 46.
23. Sharma, U.; Kumar, P.; Kumar, N.; Kumar, V.; Singh, B. *Adv. Synth. Catal.* **2010**, *352*, 1834.
24. Luo, X.; Chen, X.; Chen, L.; Zhang, K.; Li, Y. *Chem. Commun.* **2019**, *55*, 2170.
25. Motoshima, K.; Noguchi-Yachide, T.; Sugita, K.; Hashimoto, Y.; Ishikawa, M. *Bioorg. Med. Chem.* **2009**, *17*, 5001.
26. Yang, Y.; Chen, Z.; Rao, Y. *Chem. Commun.* **2014**, *50*, 15037.

## Copies of $^1\text{H}$ and $^{13}\text{C}$ NMR spectra for all reduction products

$^1\text{H}$  and  $^{13}\text{C}$  NMR spectra of compound **2a**

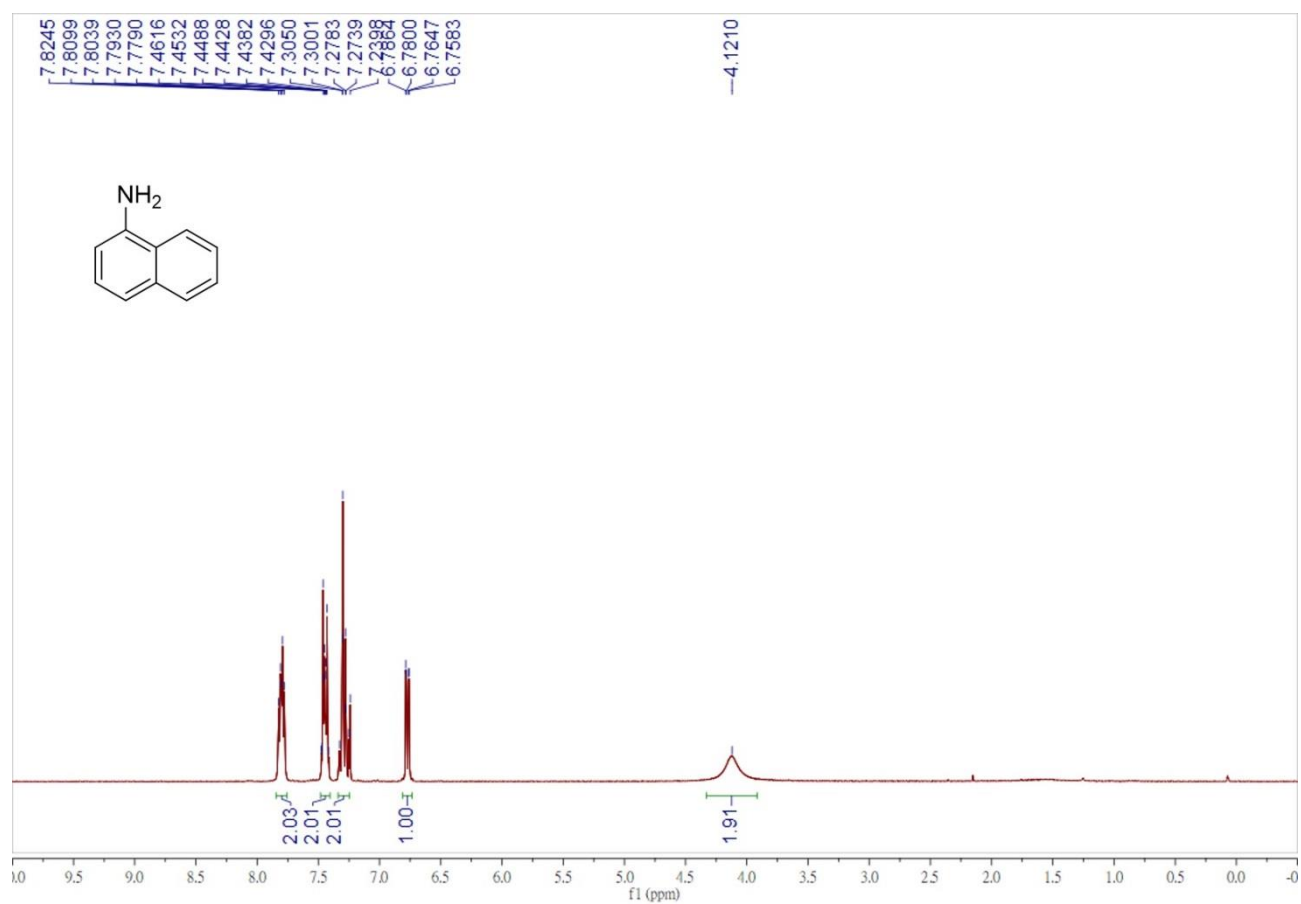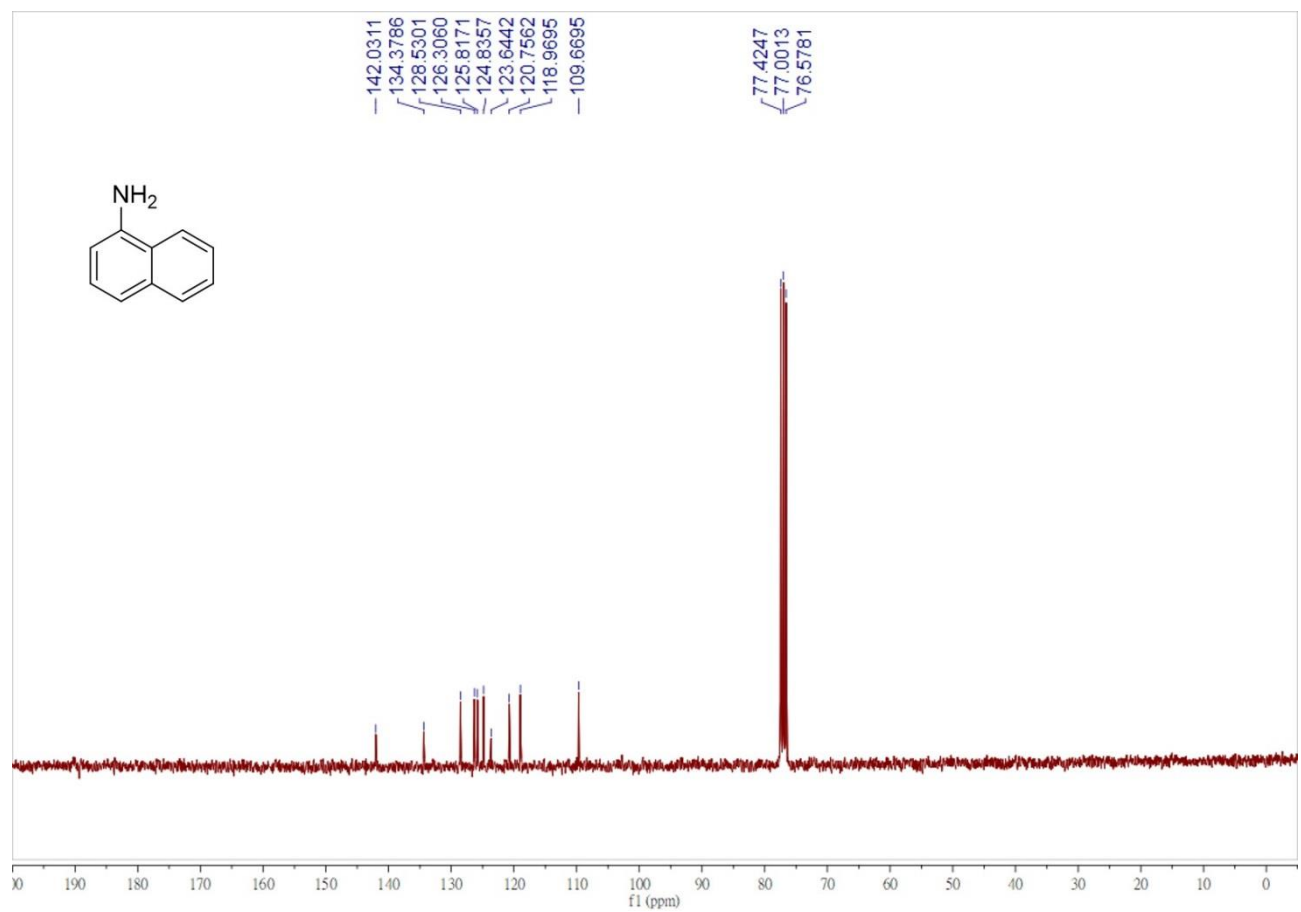

$^1\text{H}$  and  $^{13}\text{C}$  NMR spectra of compound **2b**

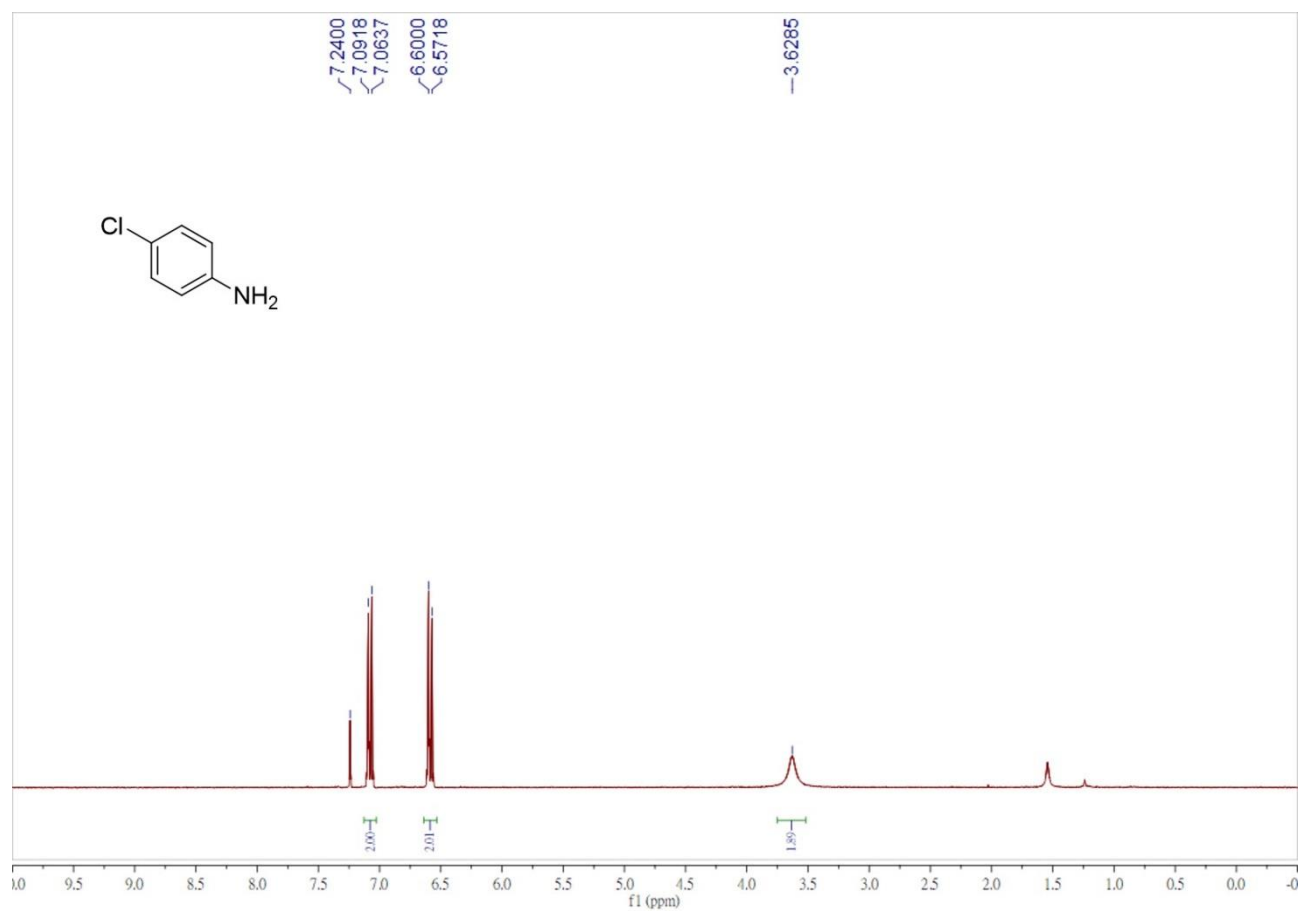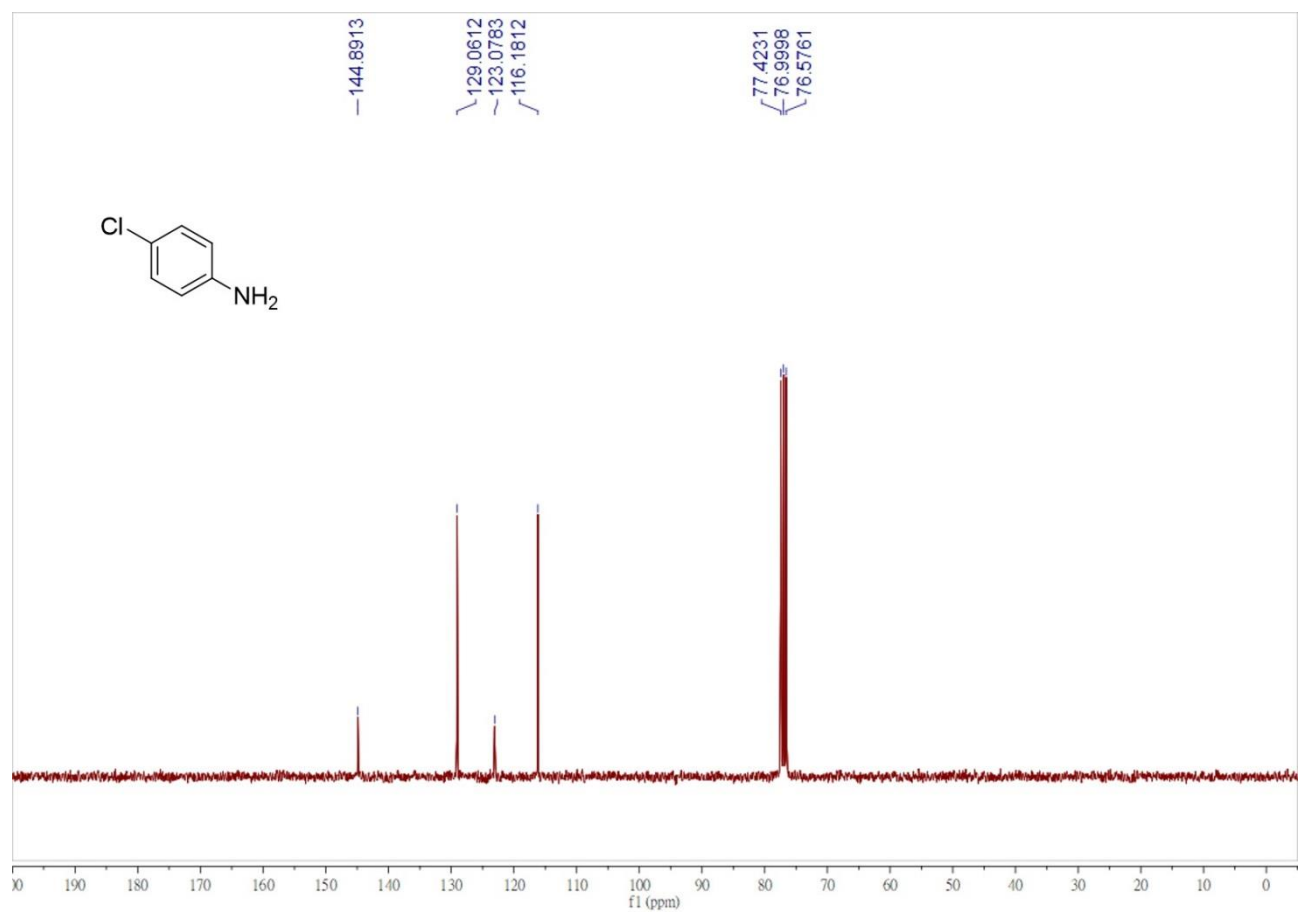

$^1\text{H}$  and  $^{13}\text{C}$  NMR spectra of compound **2c**

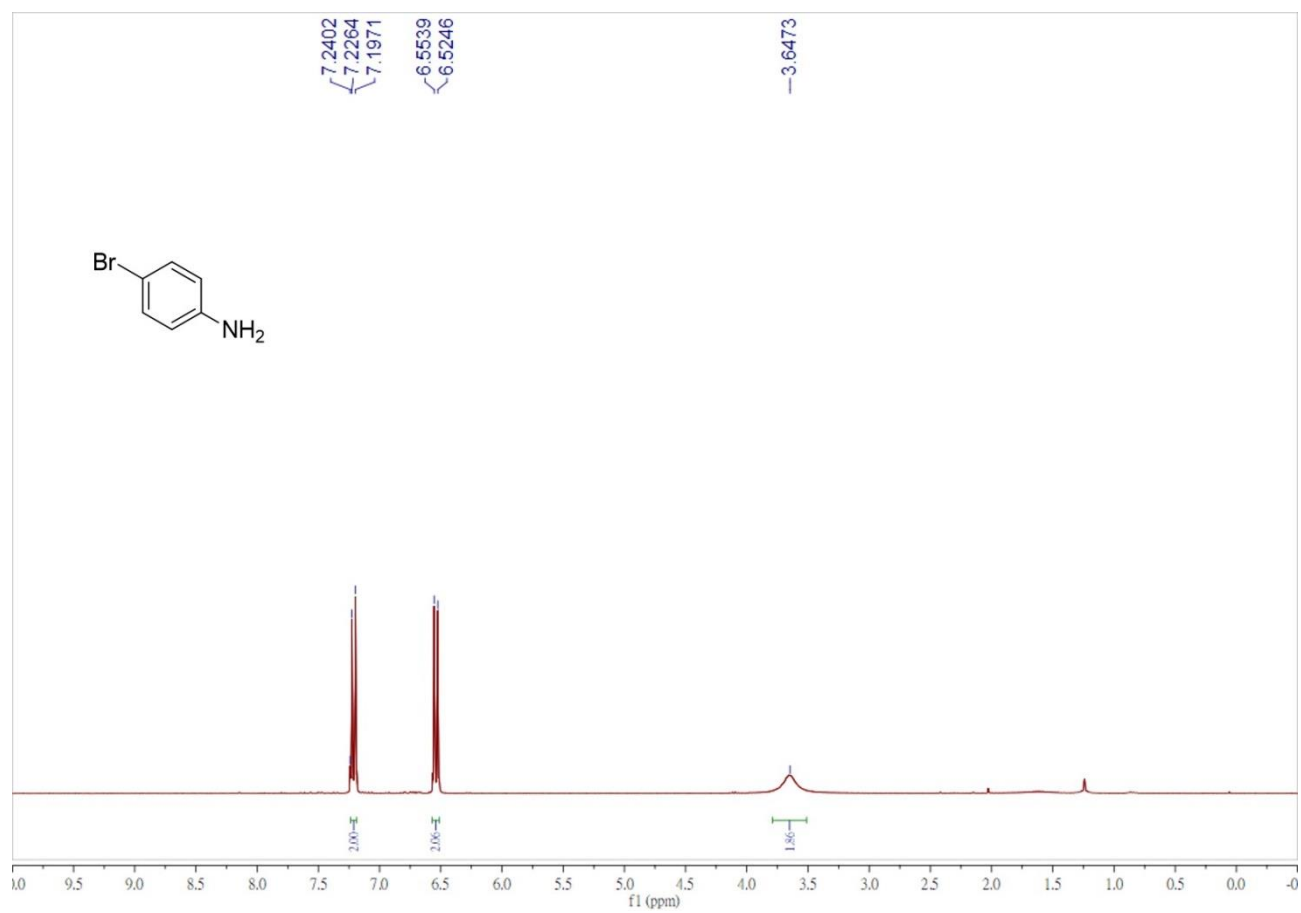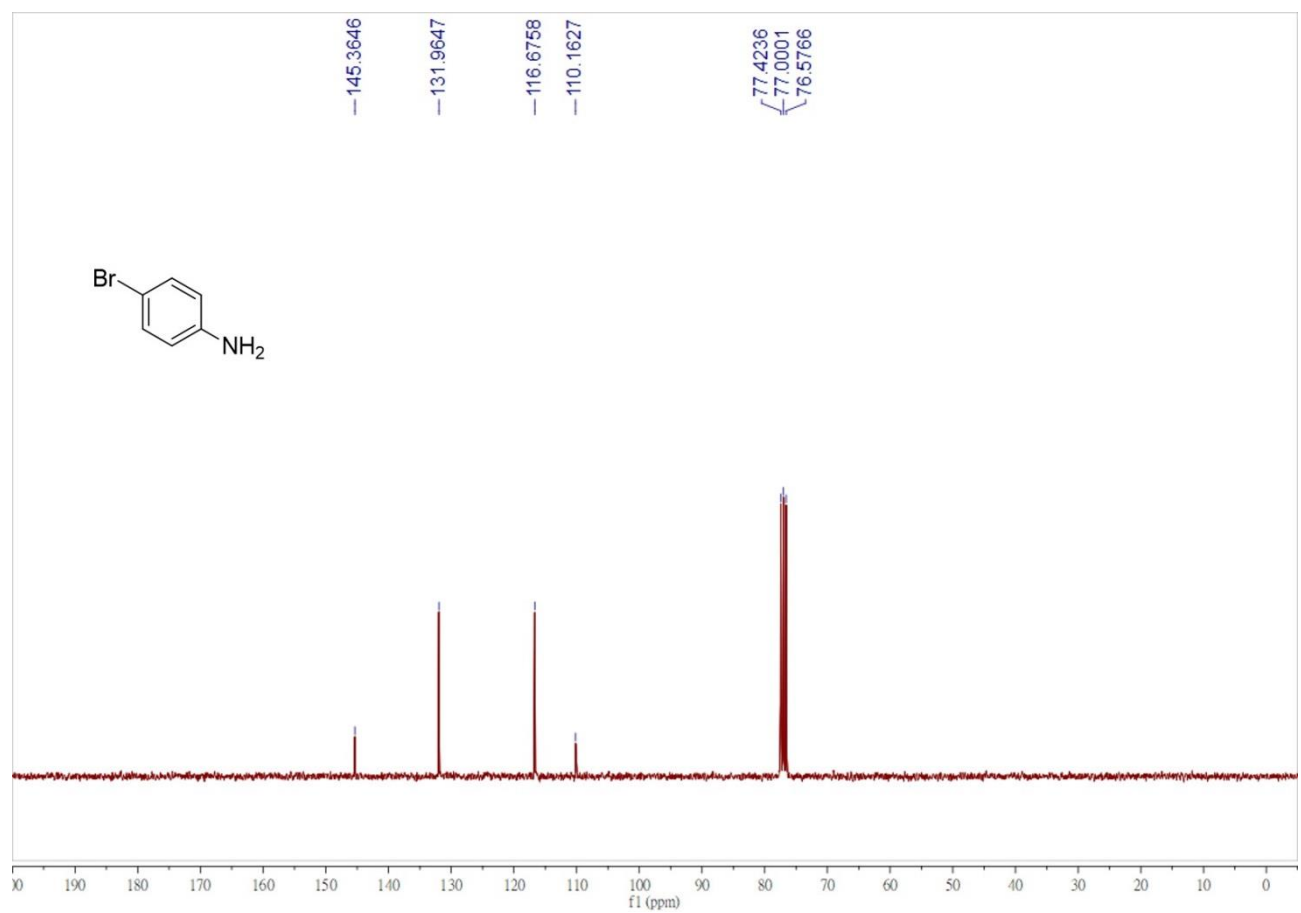

$^1\text{H}$  and  $^{13}\text{C}$  NMR spectra of compound **2d**

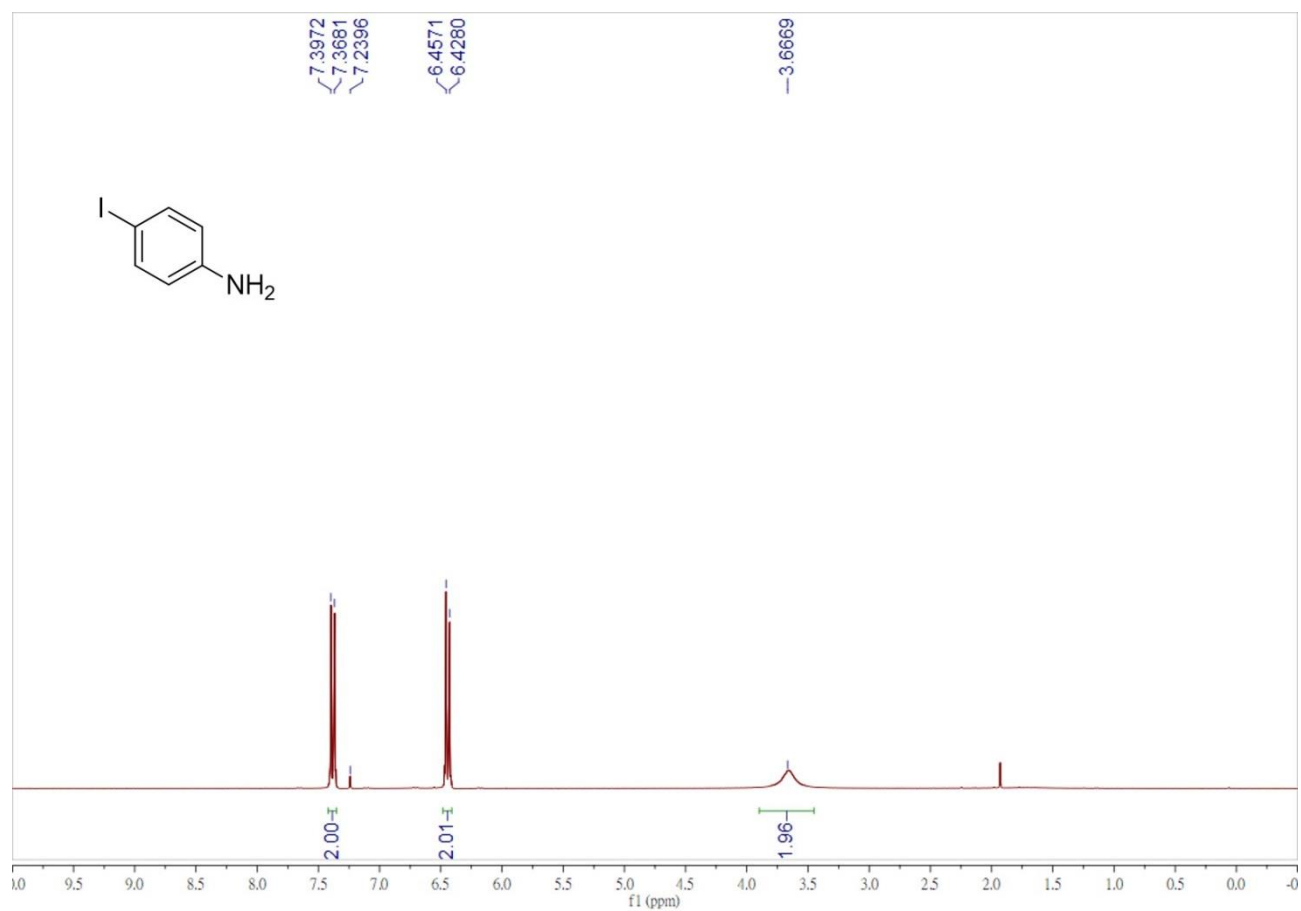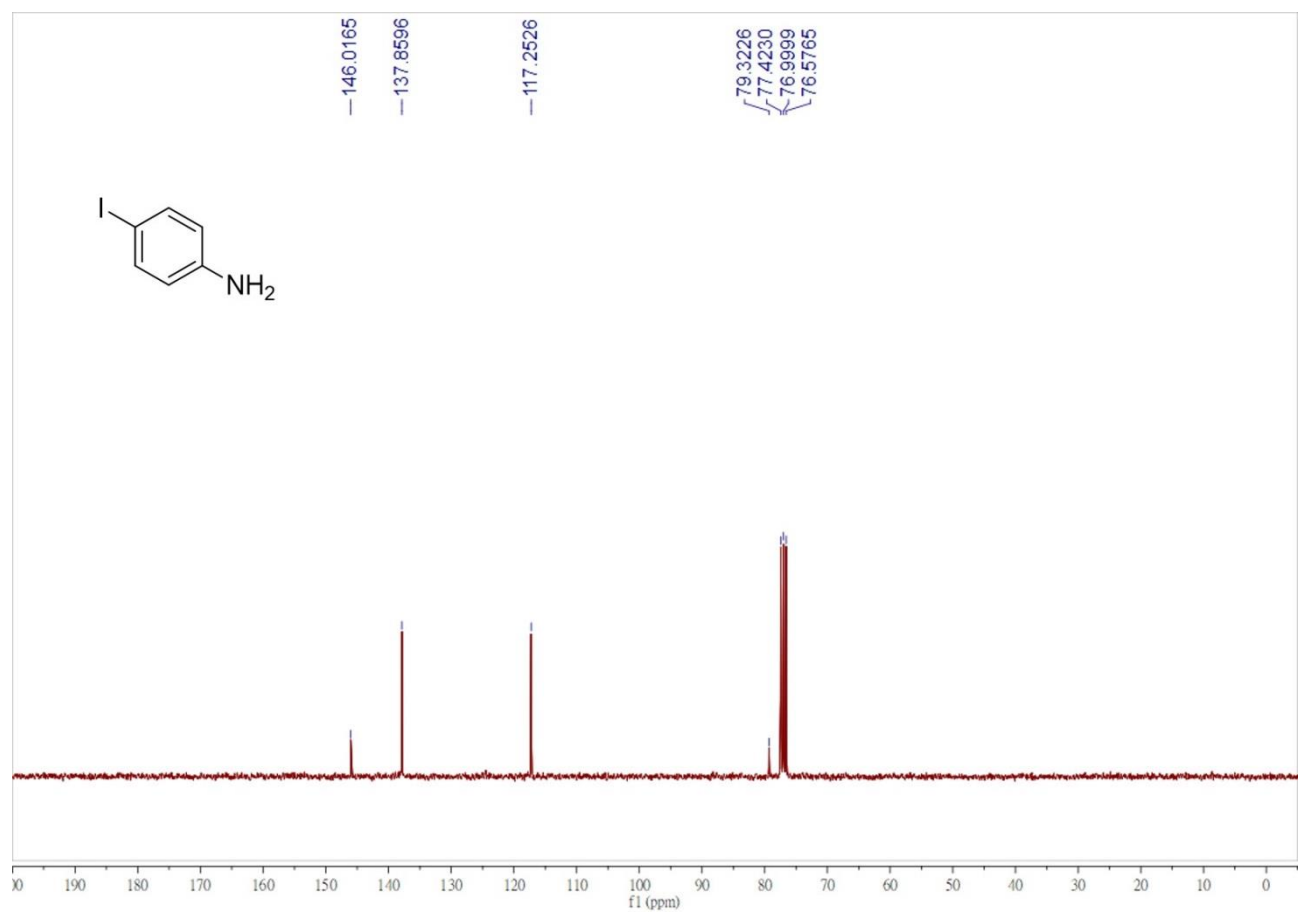

$^1\text{H}$  and  $^{13}\text{C}$  NMR spectra of compound **2e**

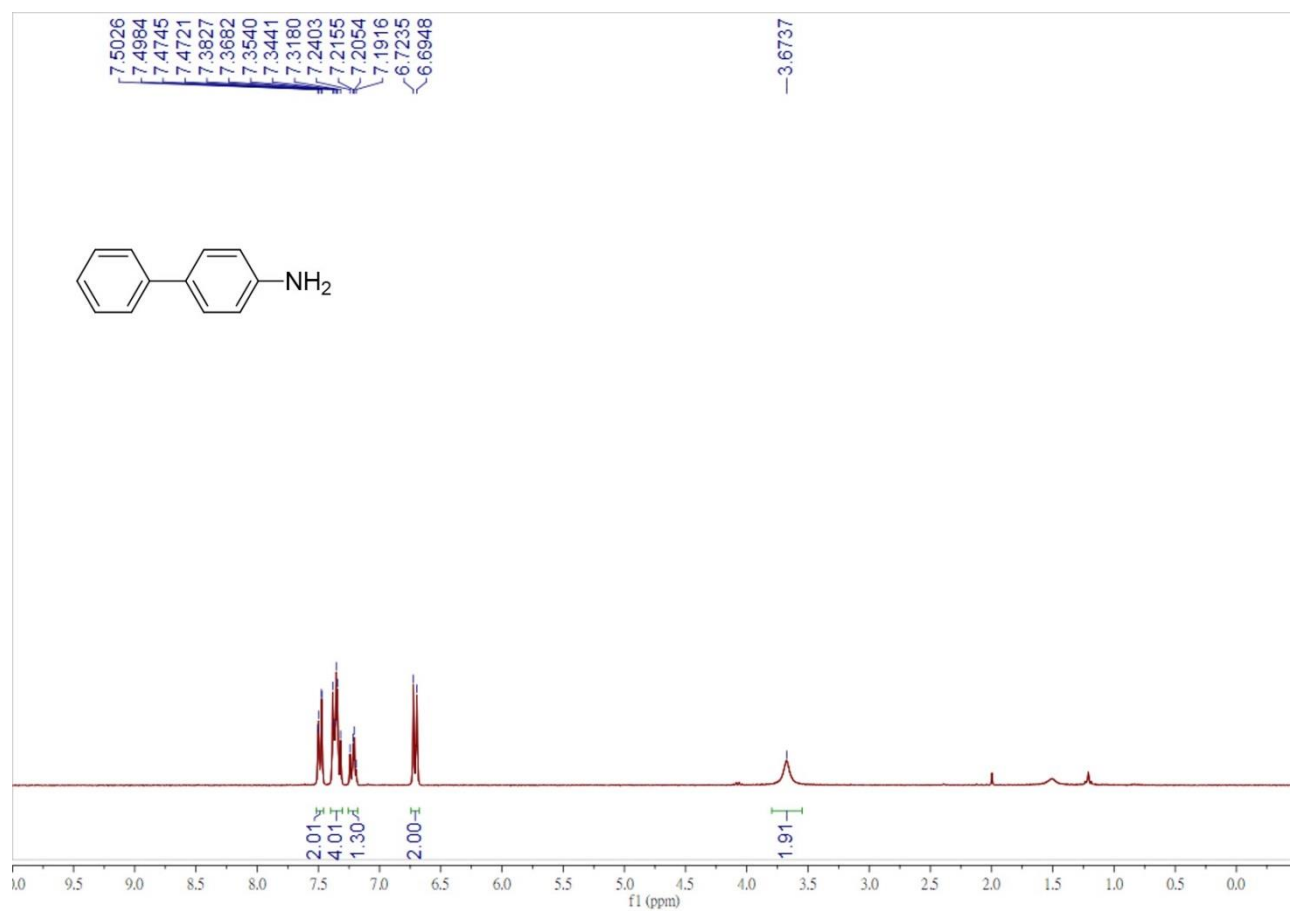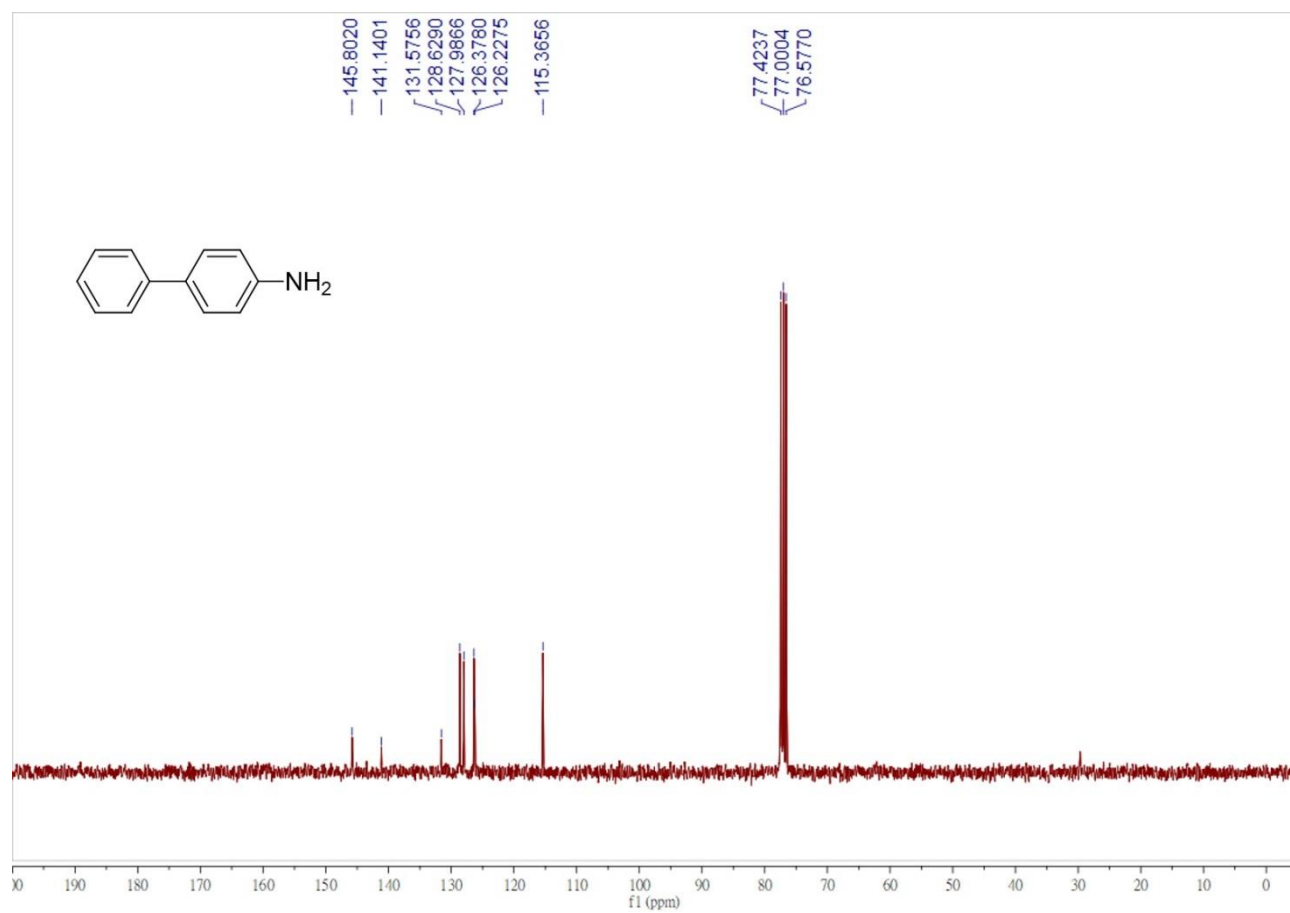



$^1\text{H}$  and  $^{13}\text{C}$  NMR spectra of compound **2f**

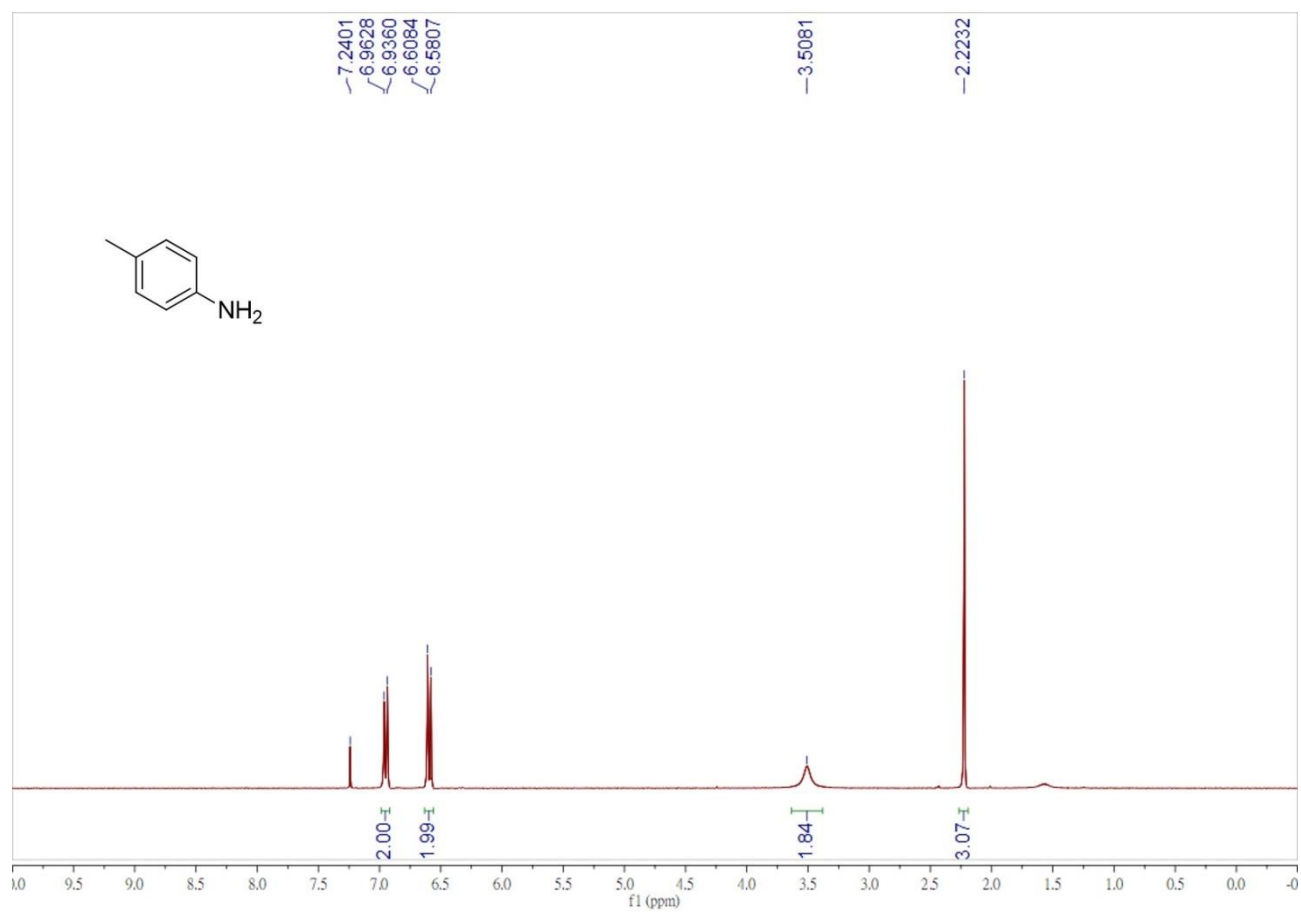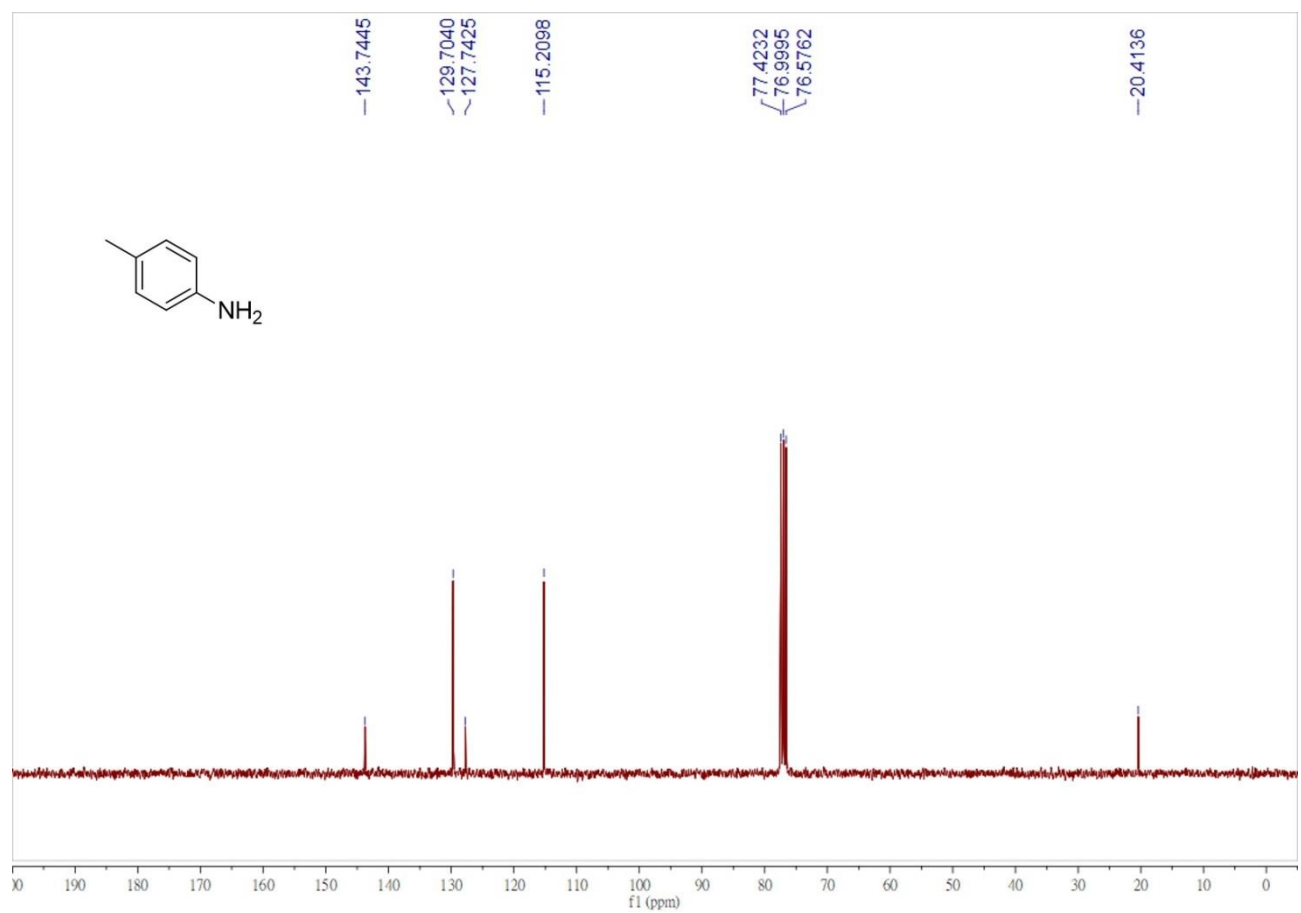

$^1\text{H}$  and  $^{13}\text{C}$  NMR spectra of compound **2g**

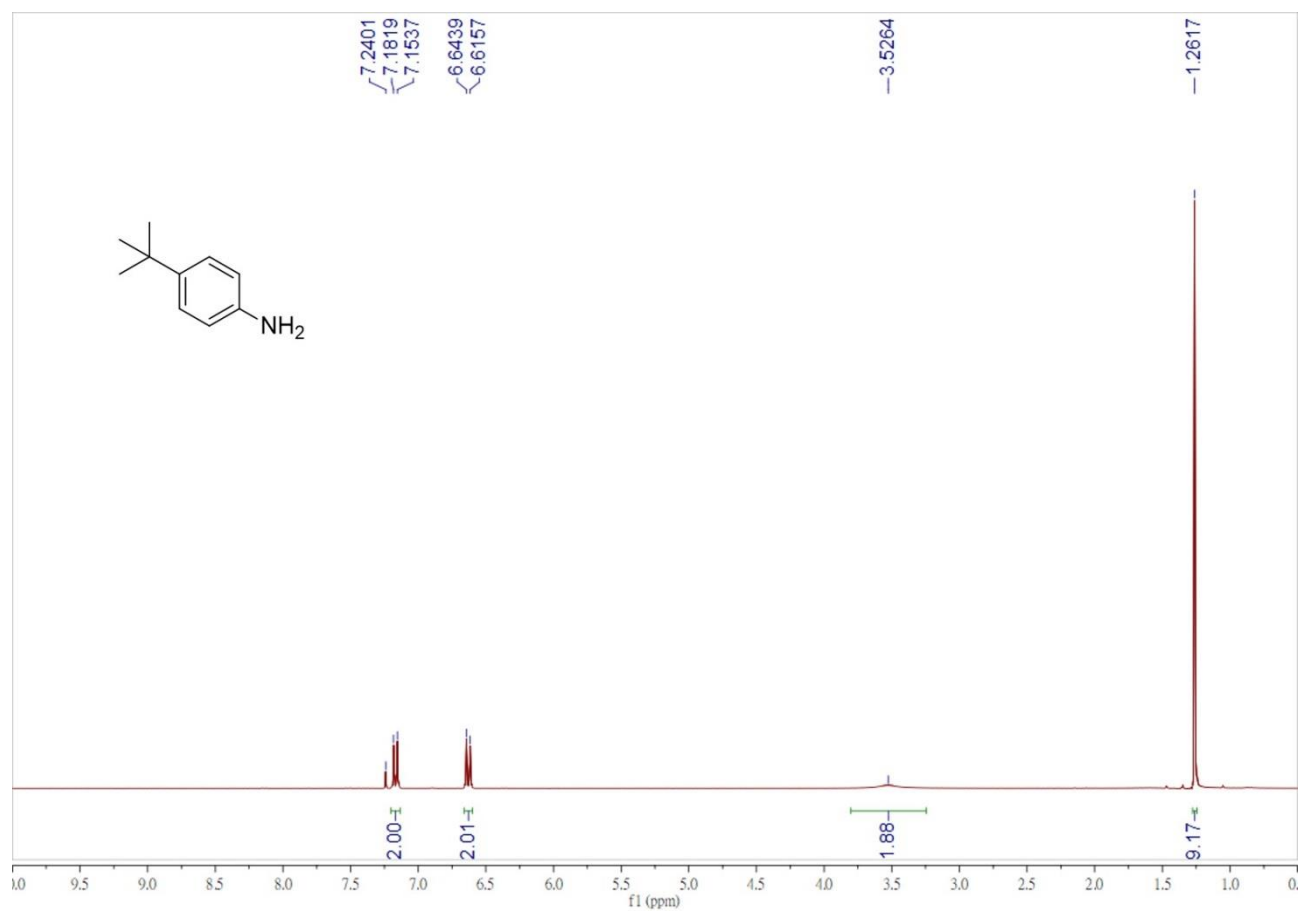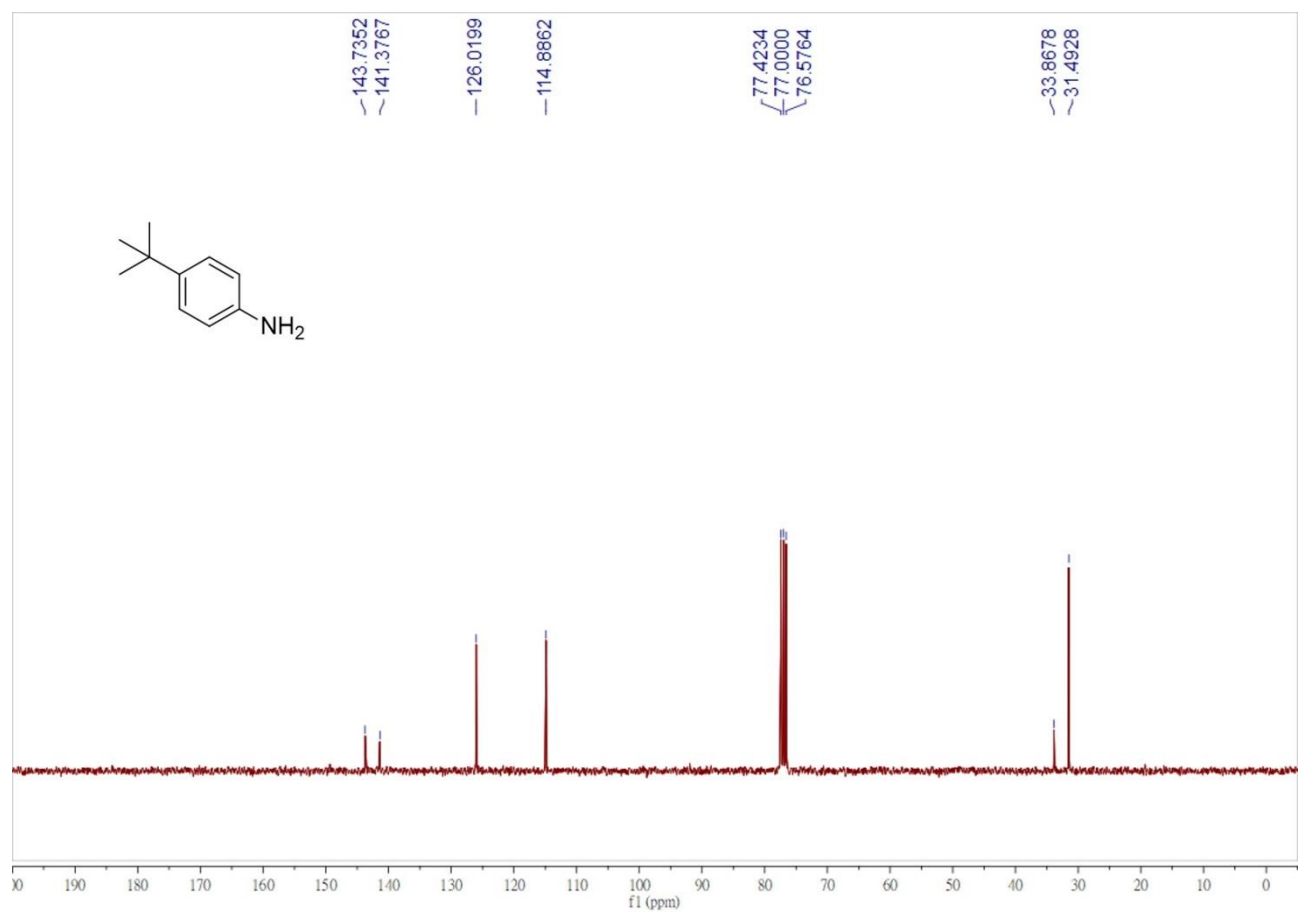

$^1\text{H}$  and  $^{13}\text{C}$  NMR spectra of compound **2h**

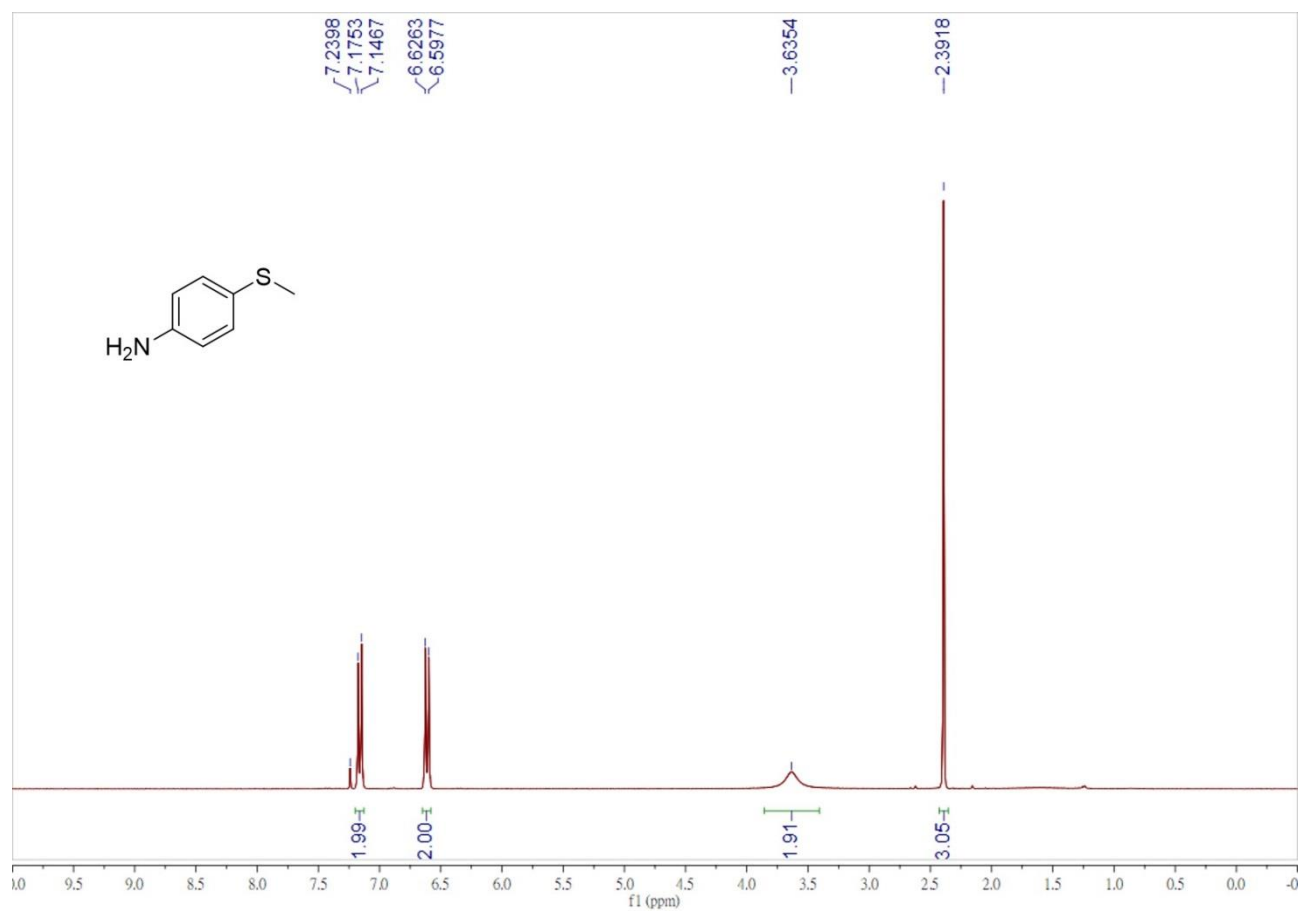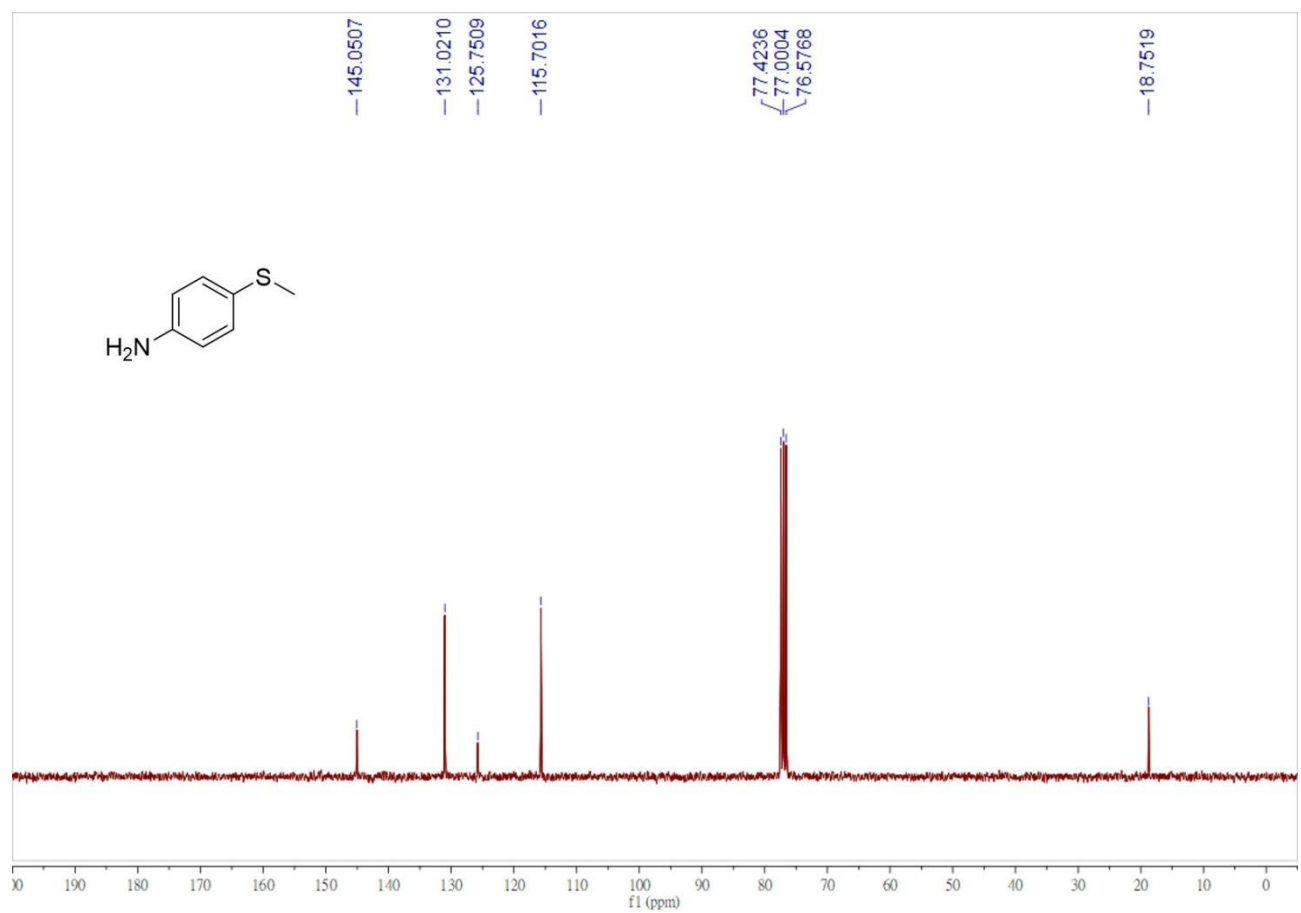

$^1\text{H}$  and  $^{13}\text{C}$  NMR spectra of compound **2i**

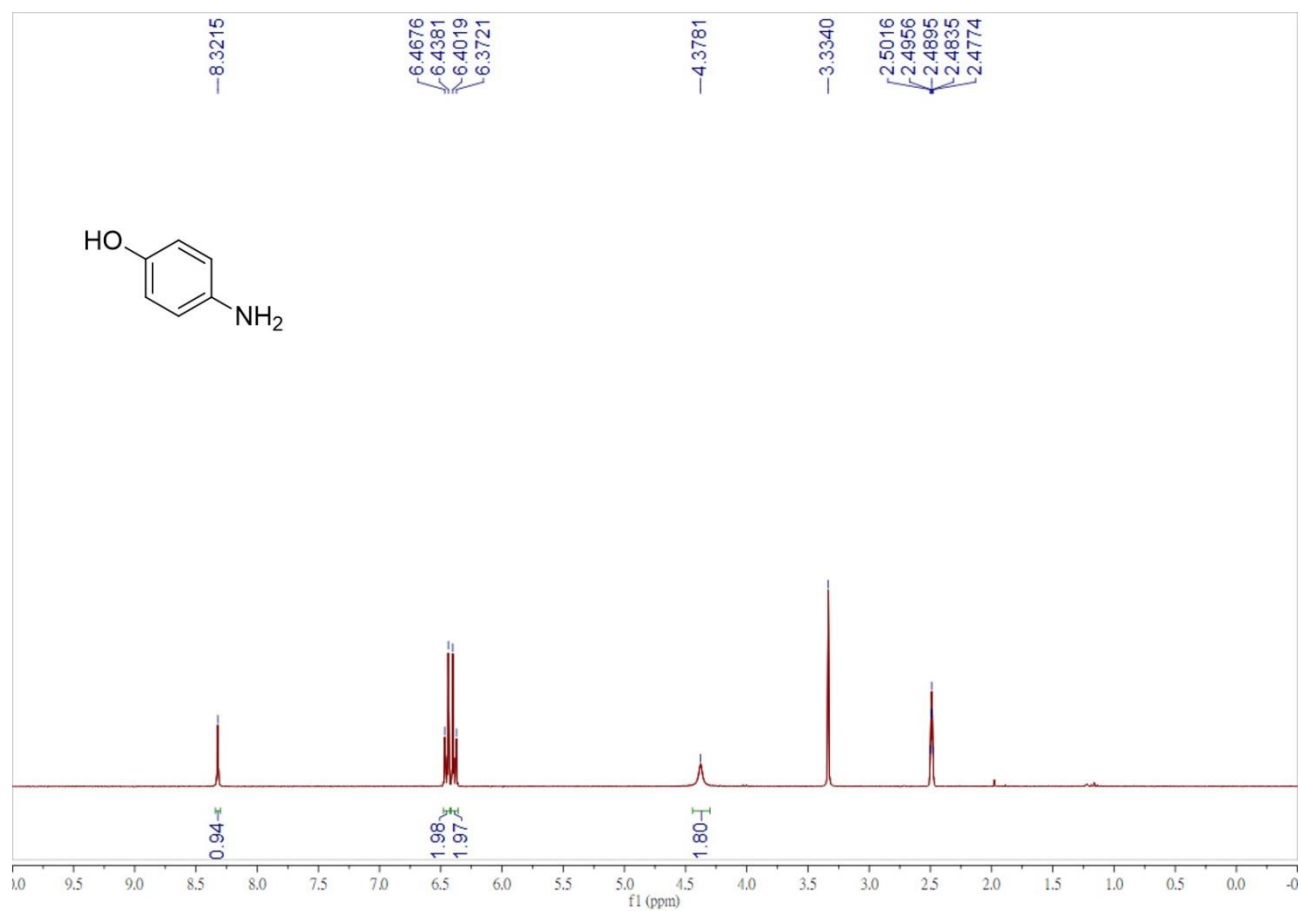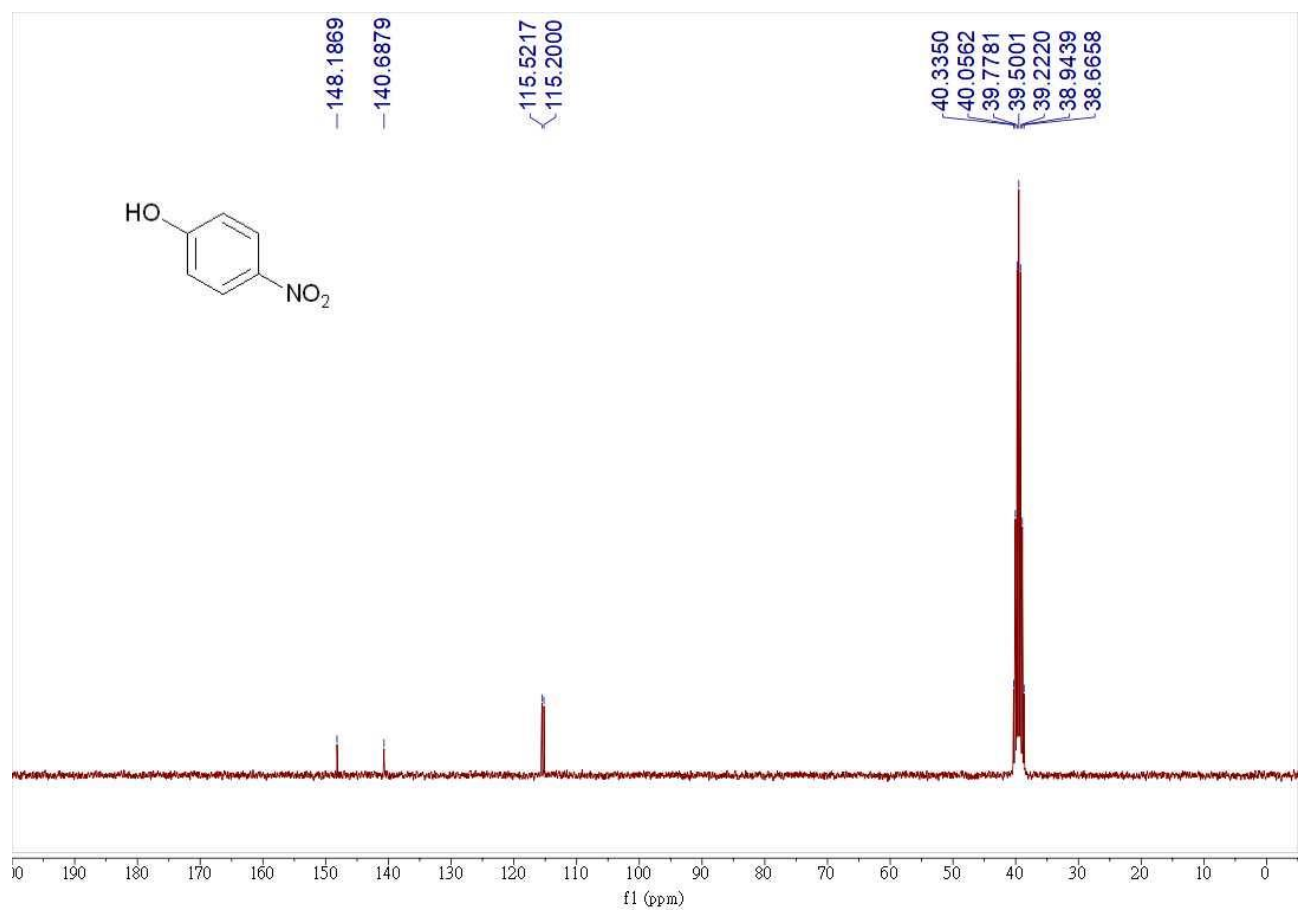

$^1\text{H}$  and  $^{13}\text{C}$  NMR spectra of compound **2j**

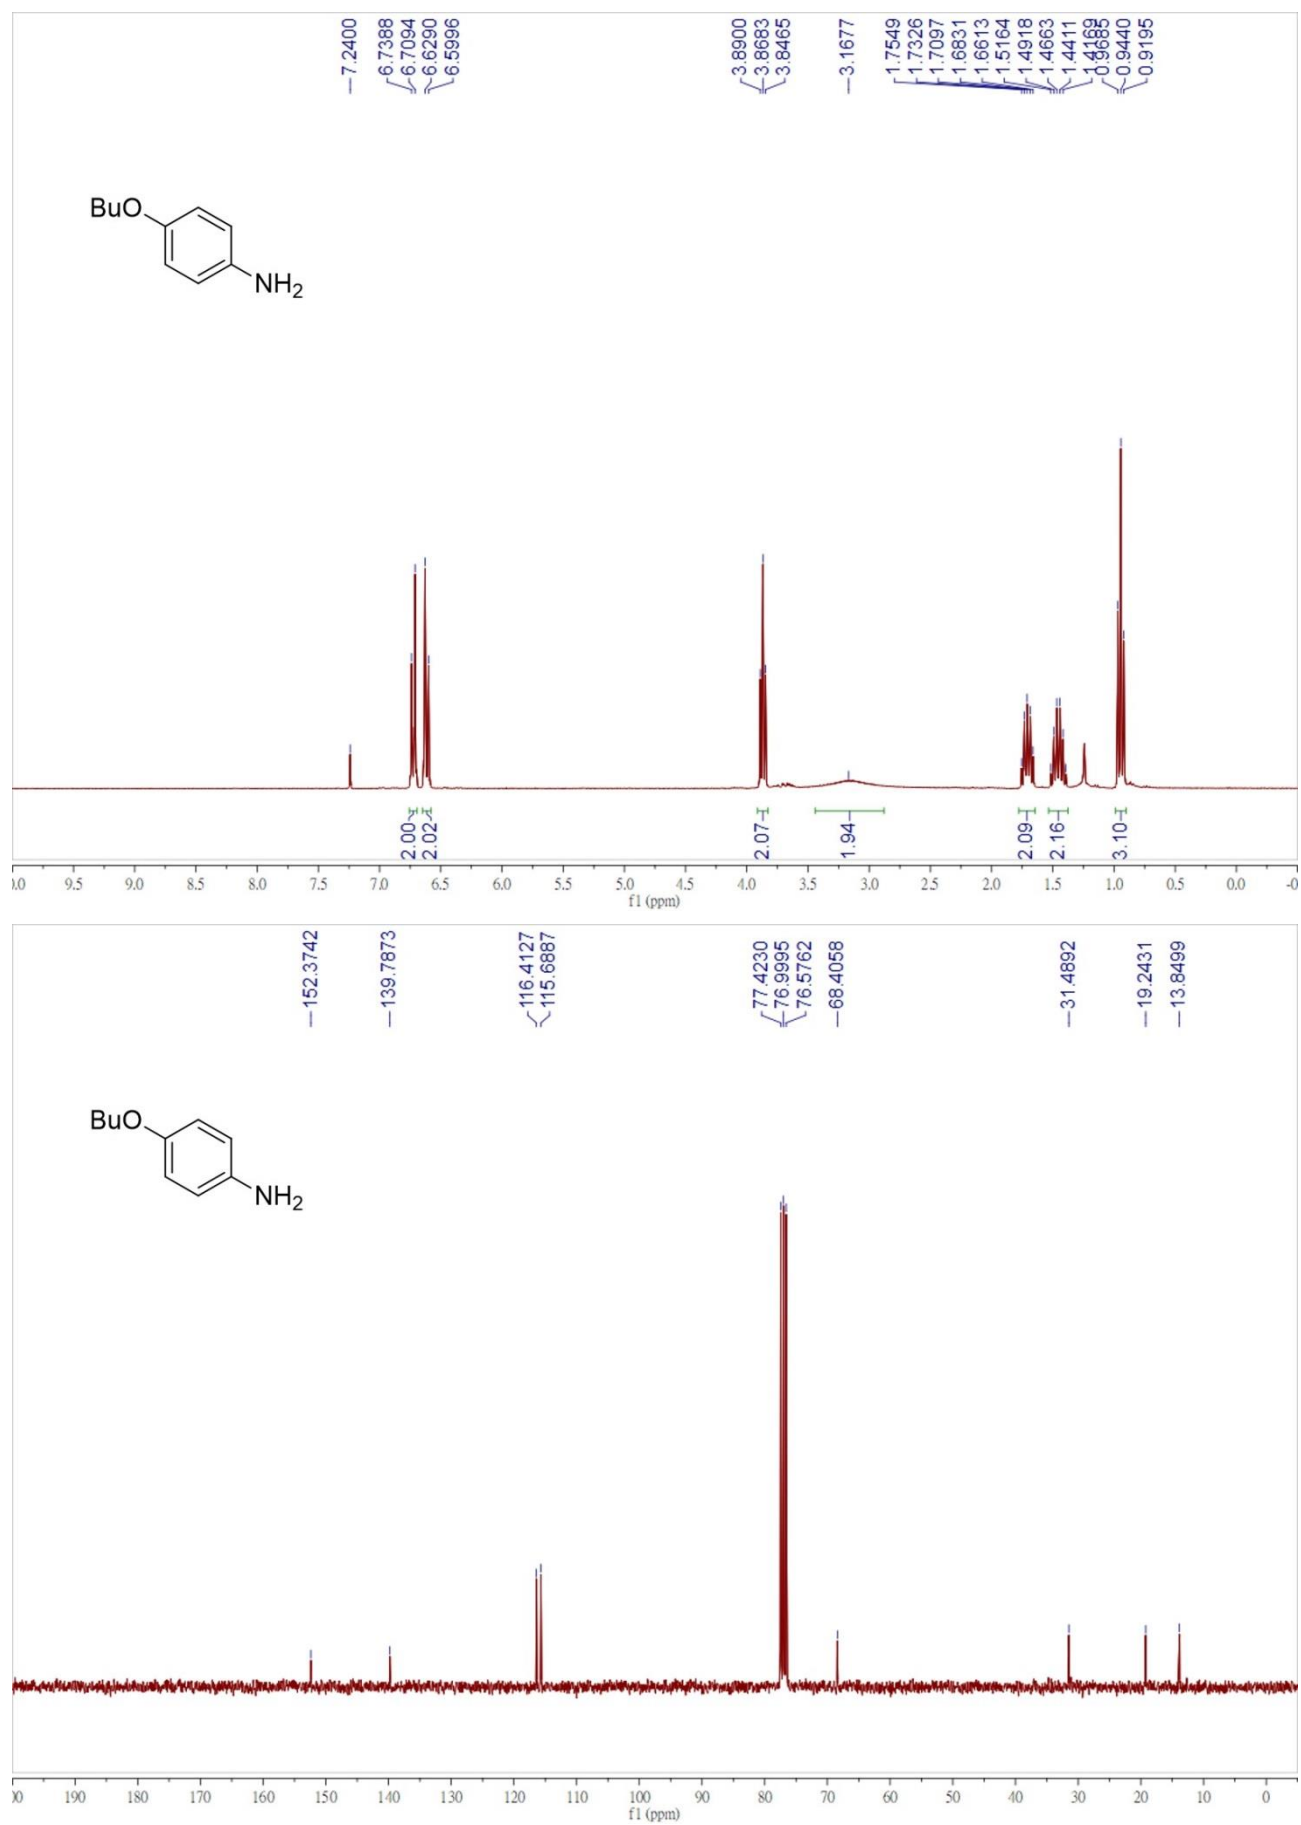

$^1\text{H}$  and  $^{13}\text{C}$  NMR spectra of compound **2k**

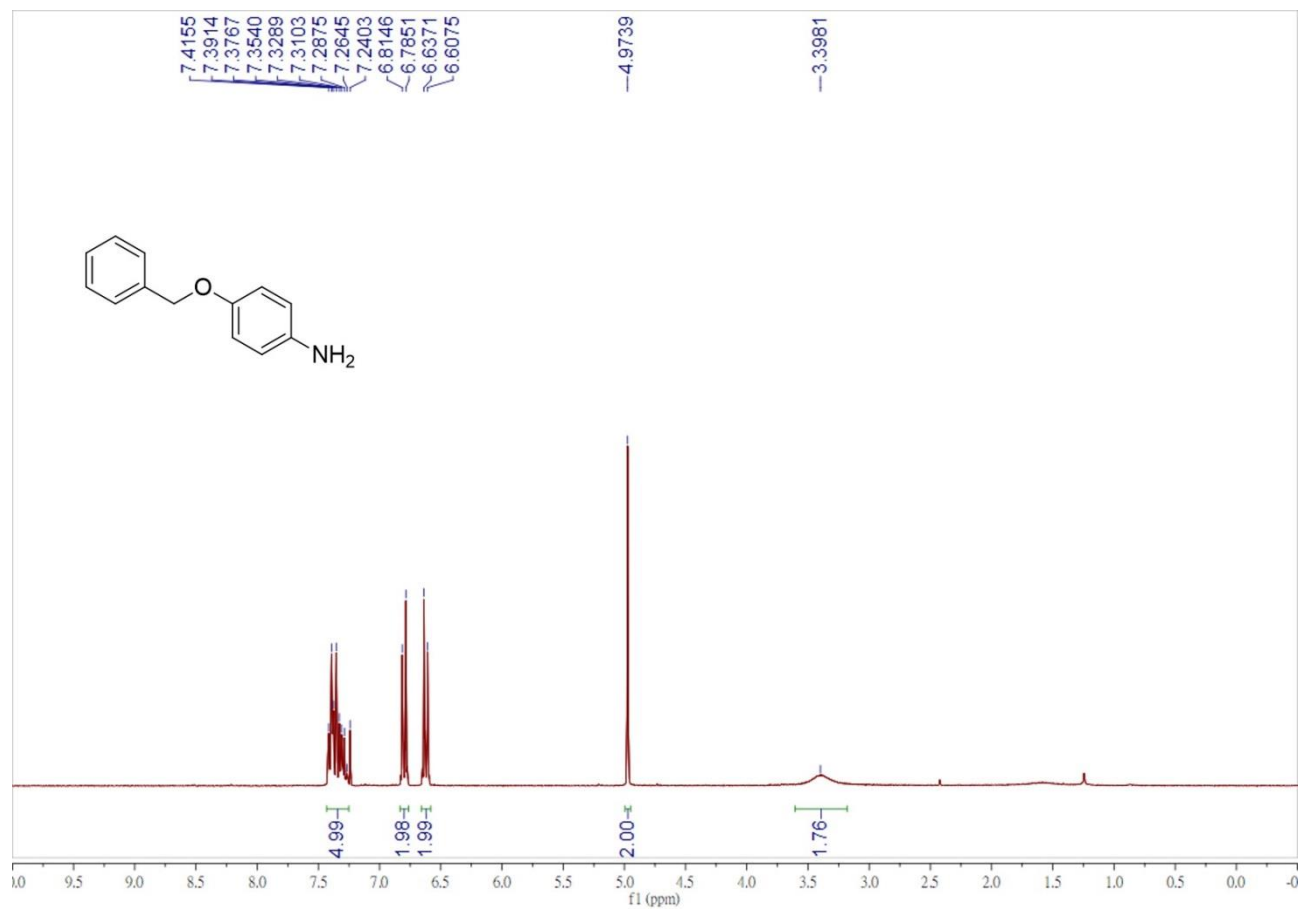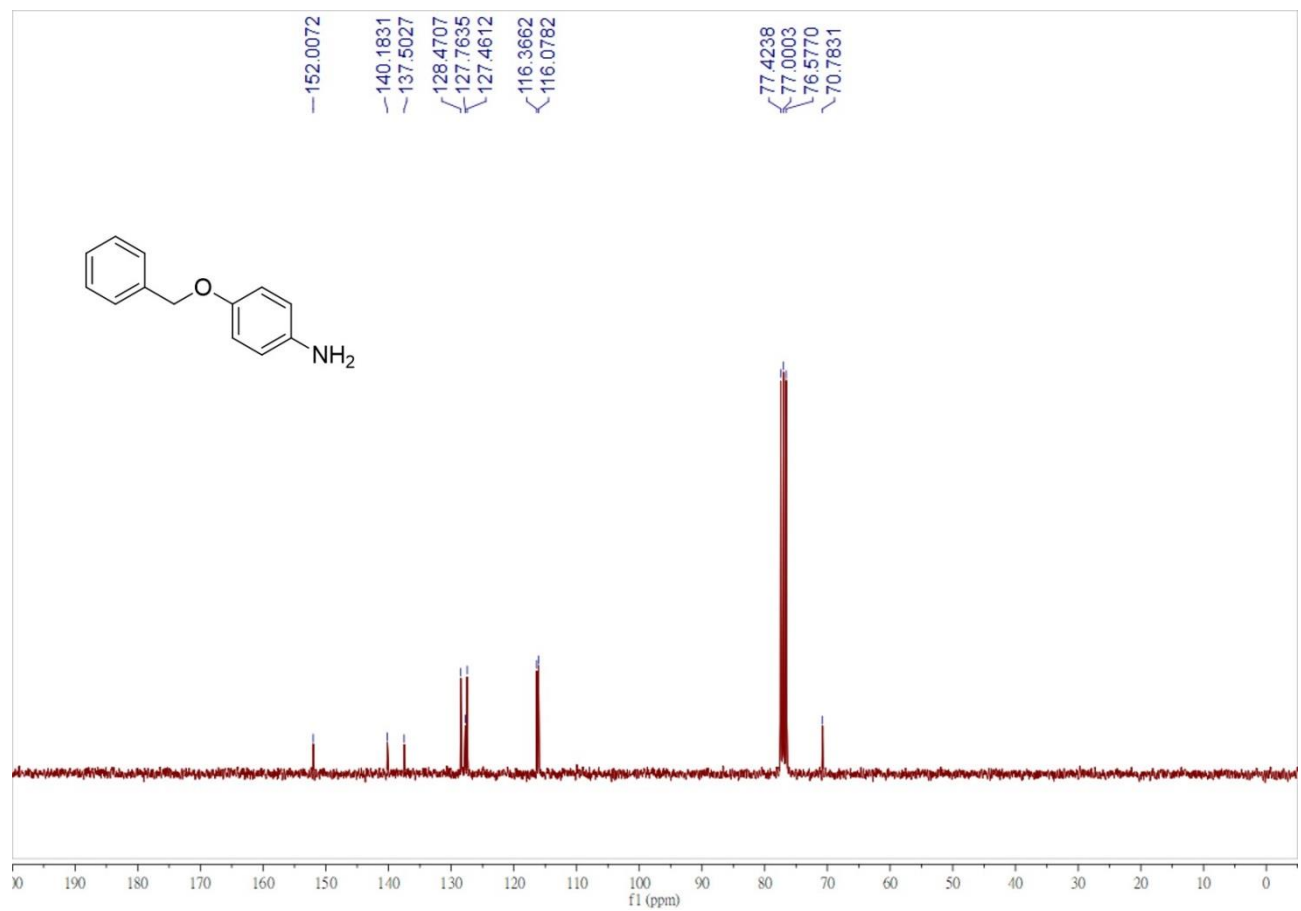

$^1\text{H}$  and  $^{13}\text{C}$  NMR spectra of compound **2I**

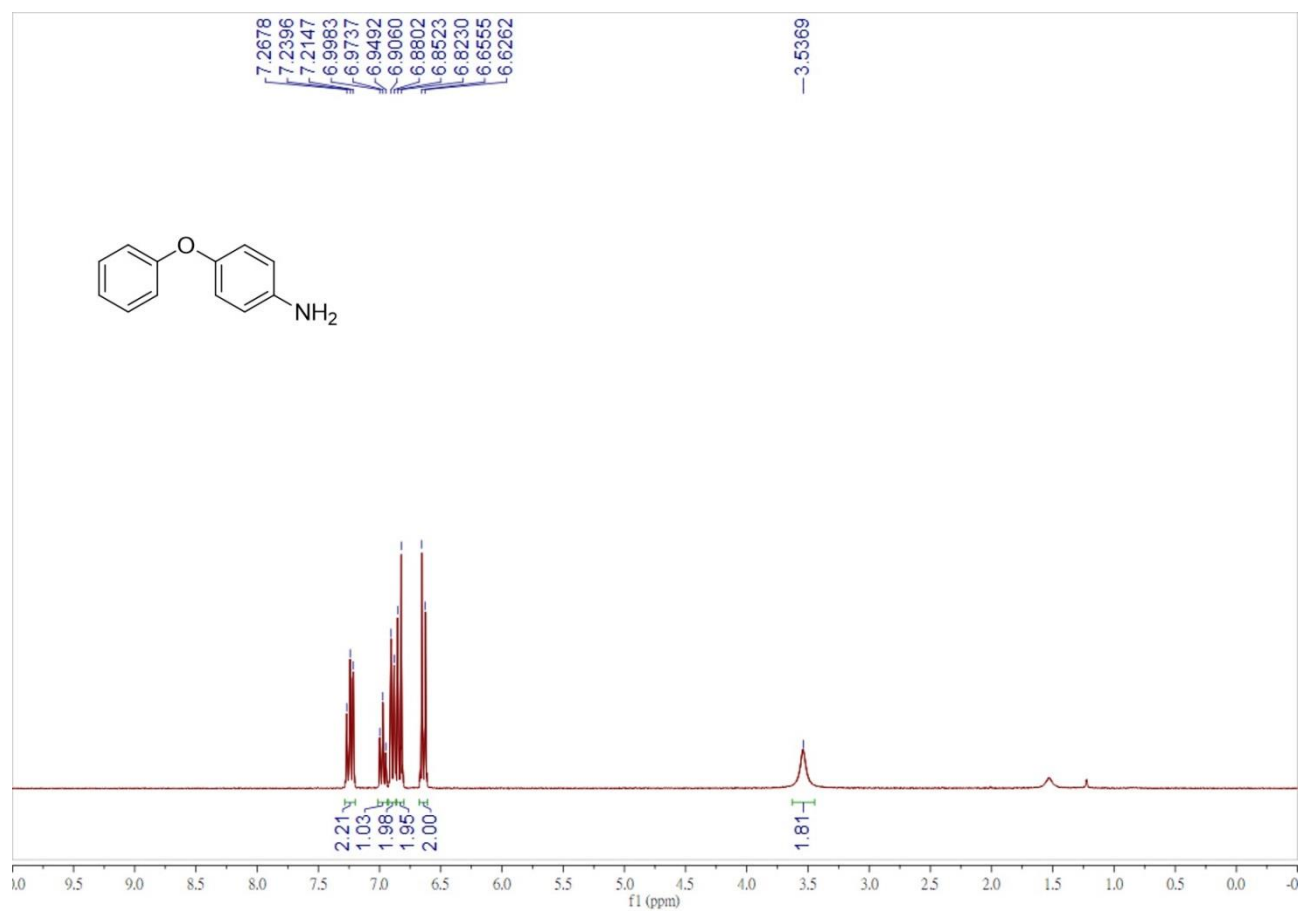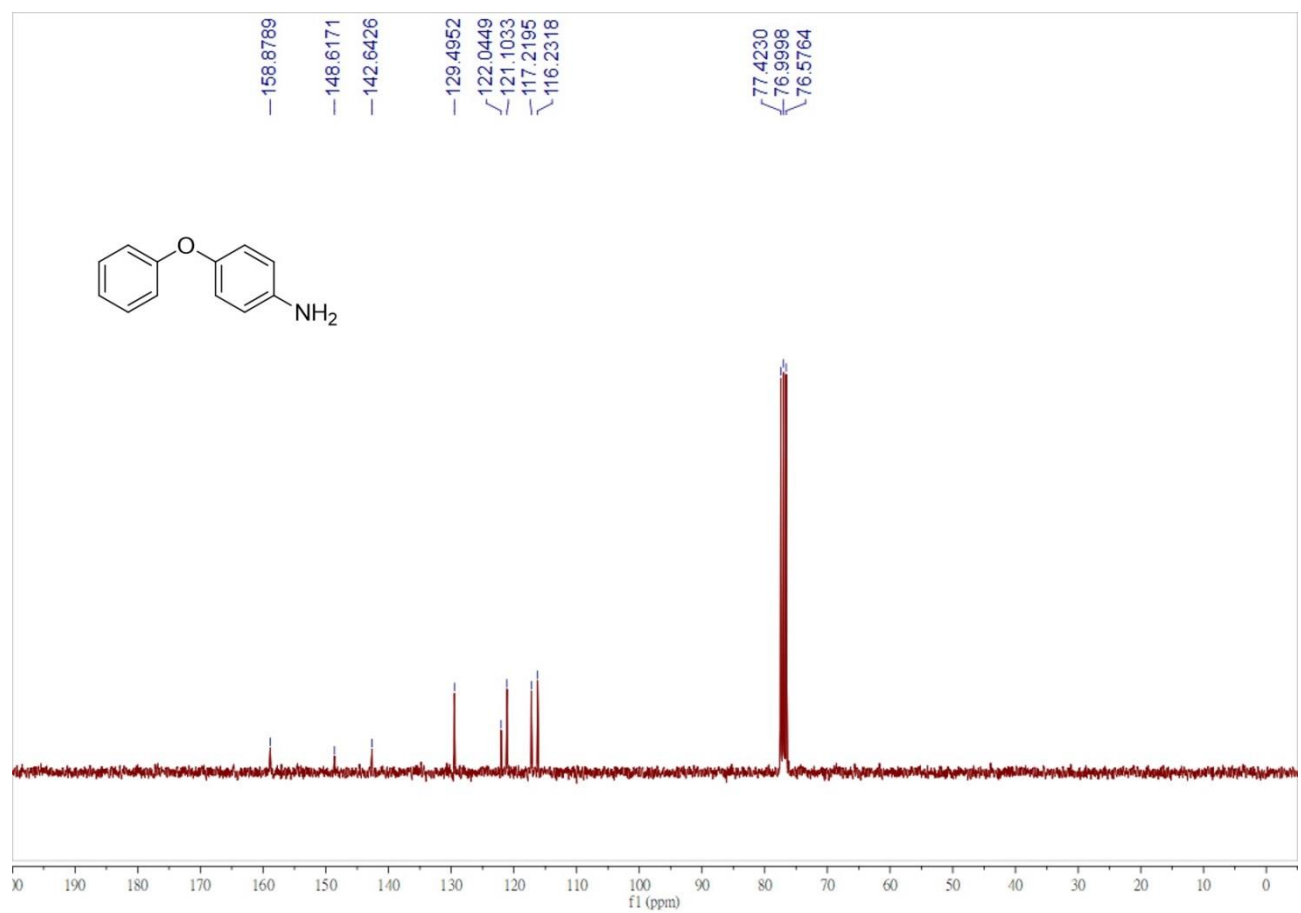

$^1\text{H}$  and  $^{13}\text{C}$  NMR spectra of compound **2m**

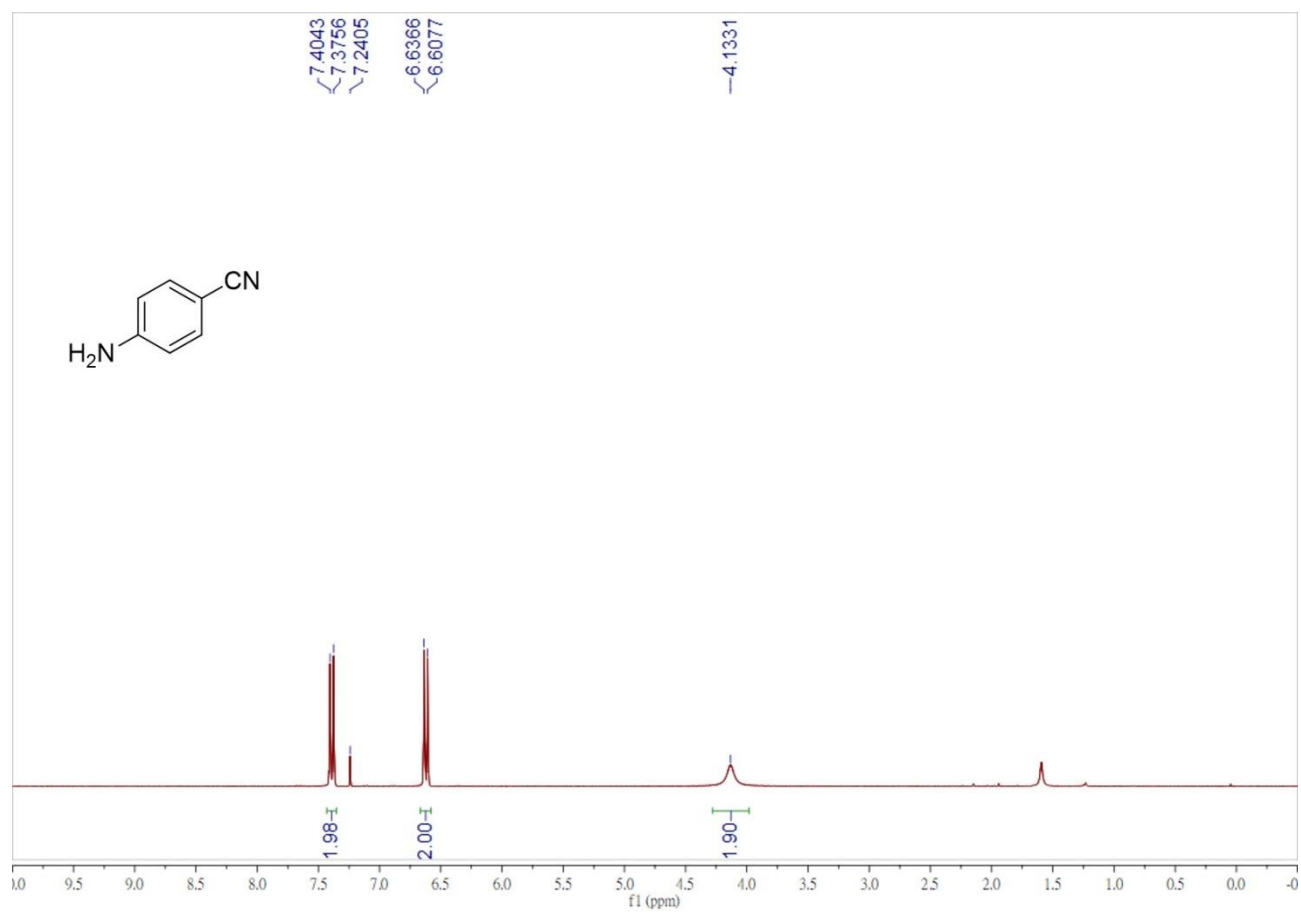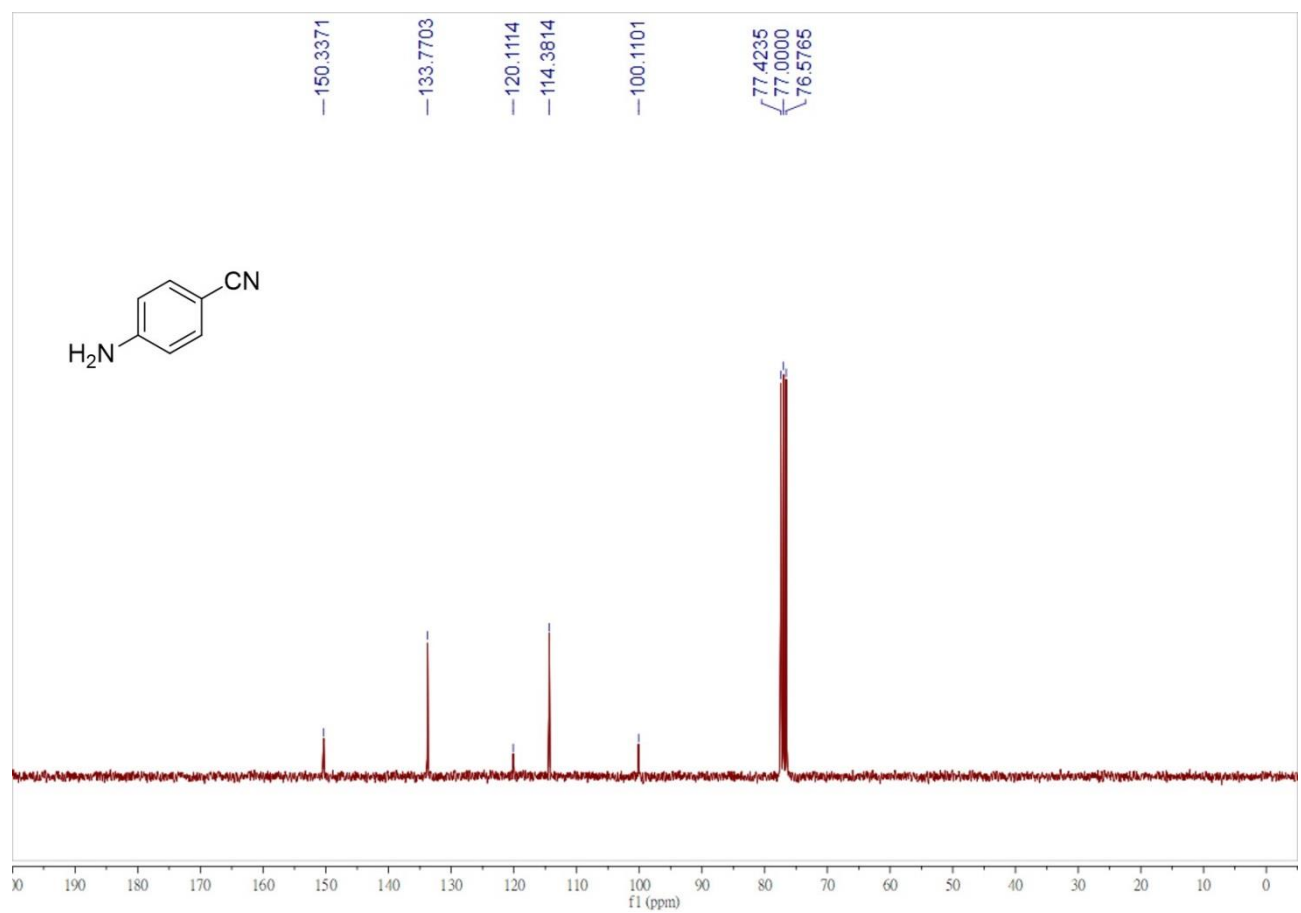



$^1\text{H}$  and  $^{13}\text{C}$  NMR spectra of compound **2n**

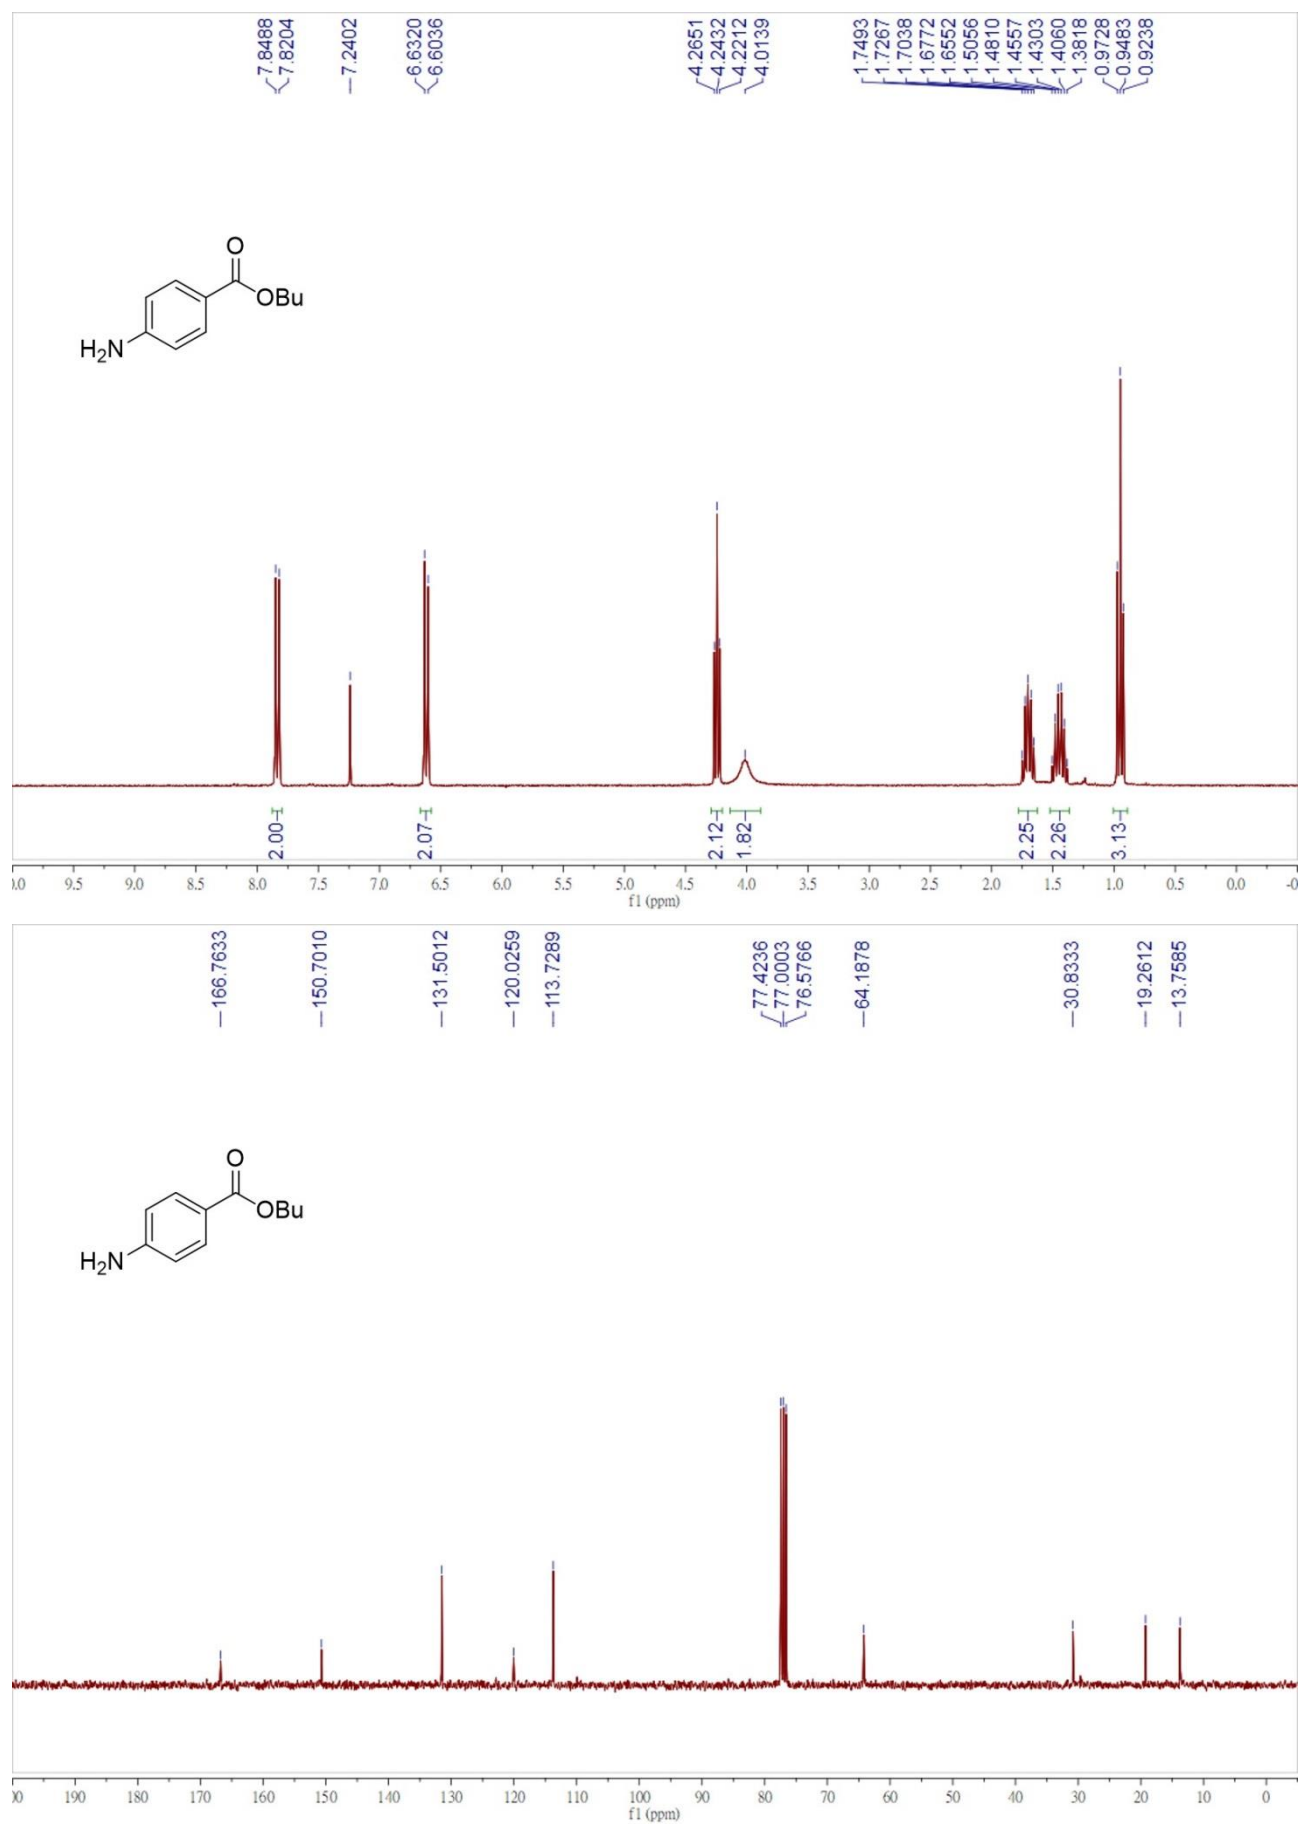

$^1\text{H}$  and  $^{13}\text{C}$  NMR spectra of compound **20**

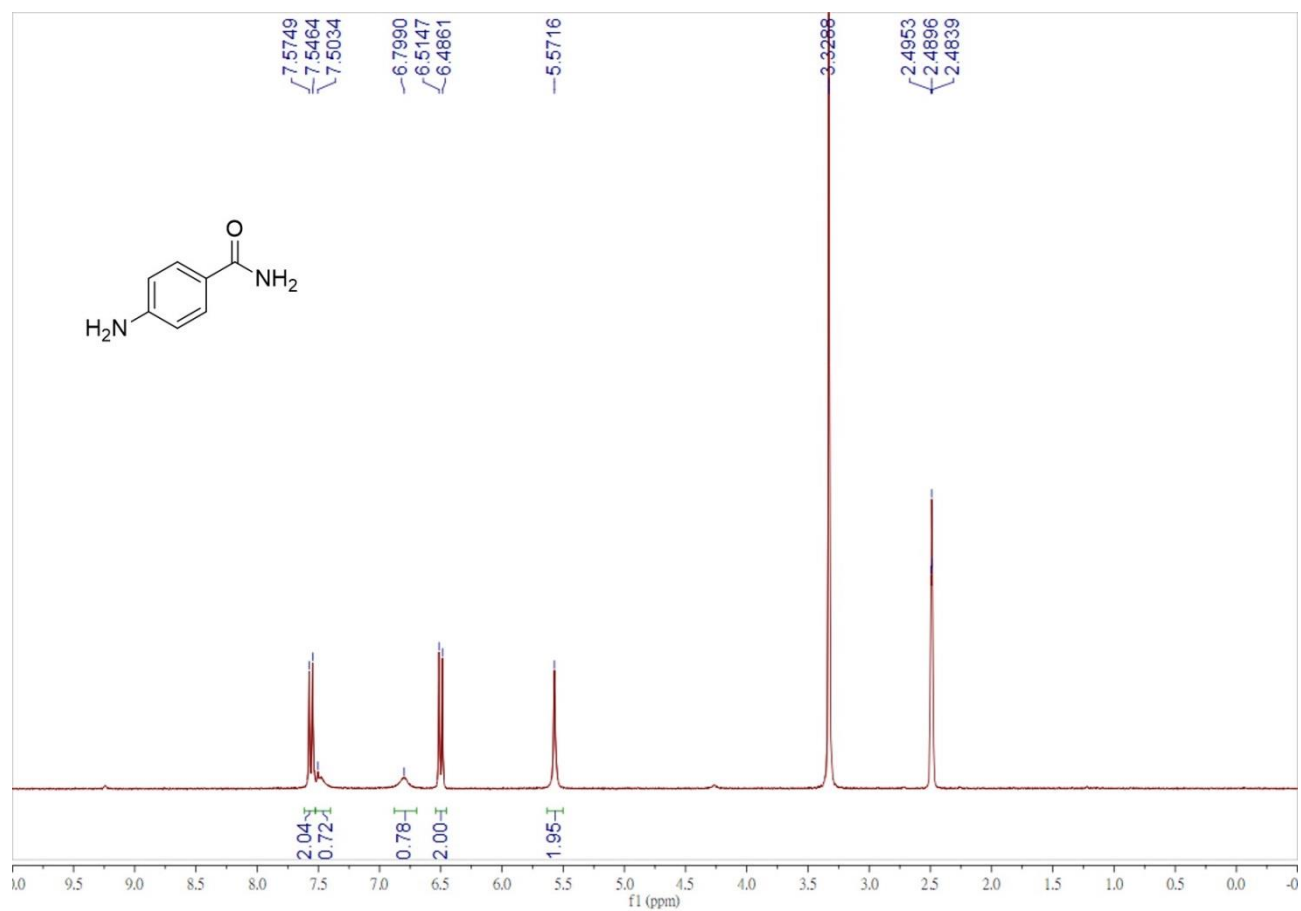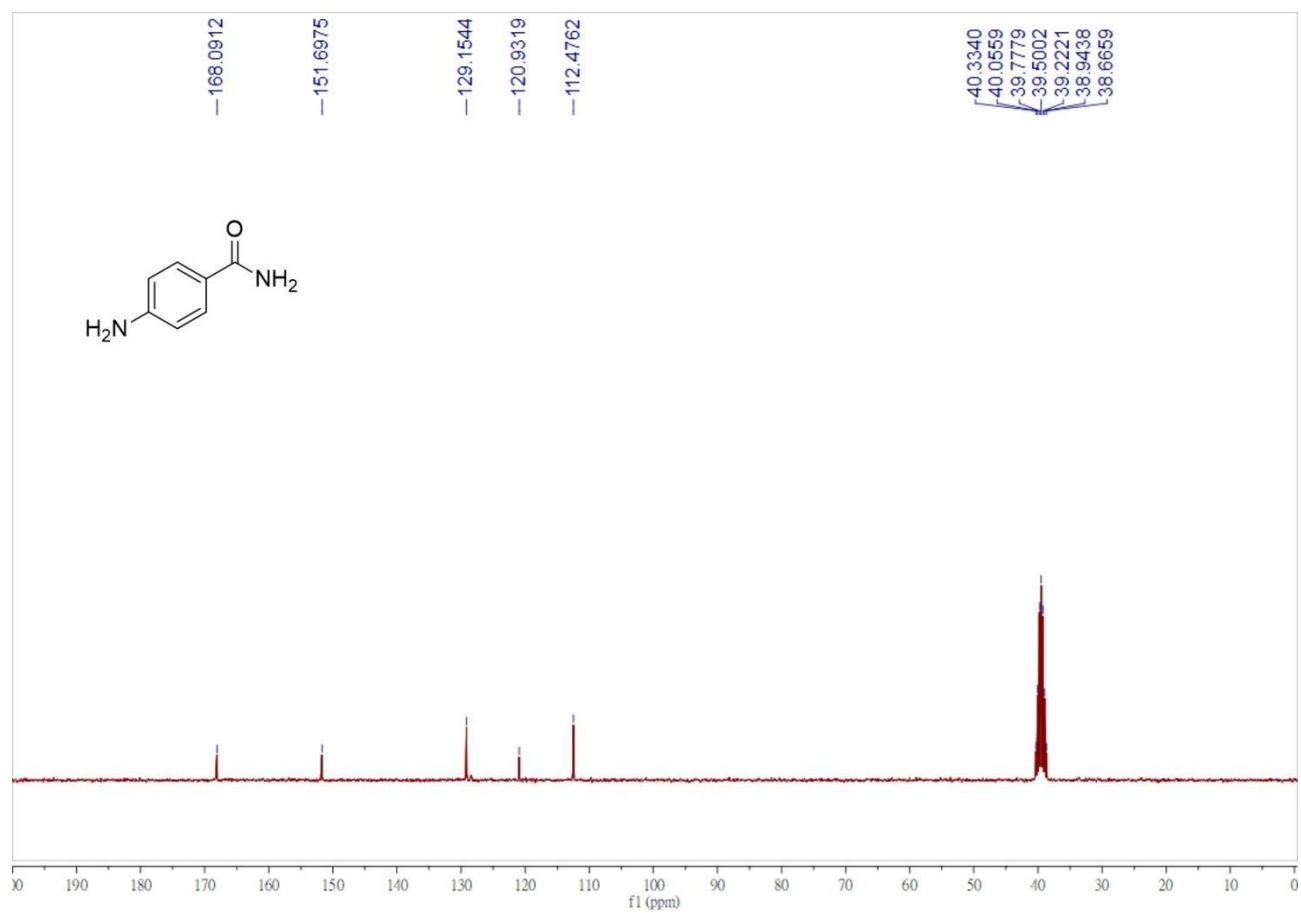

$^1\text{H}$  and  $^{13}\text{C}$  NMR spectra of compound **2p**

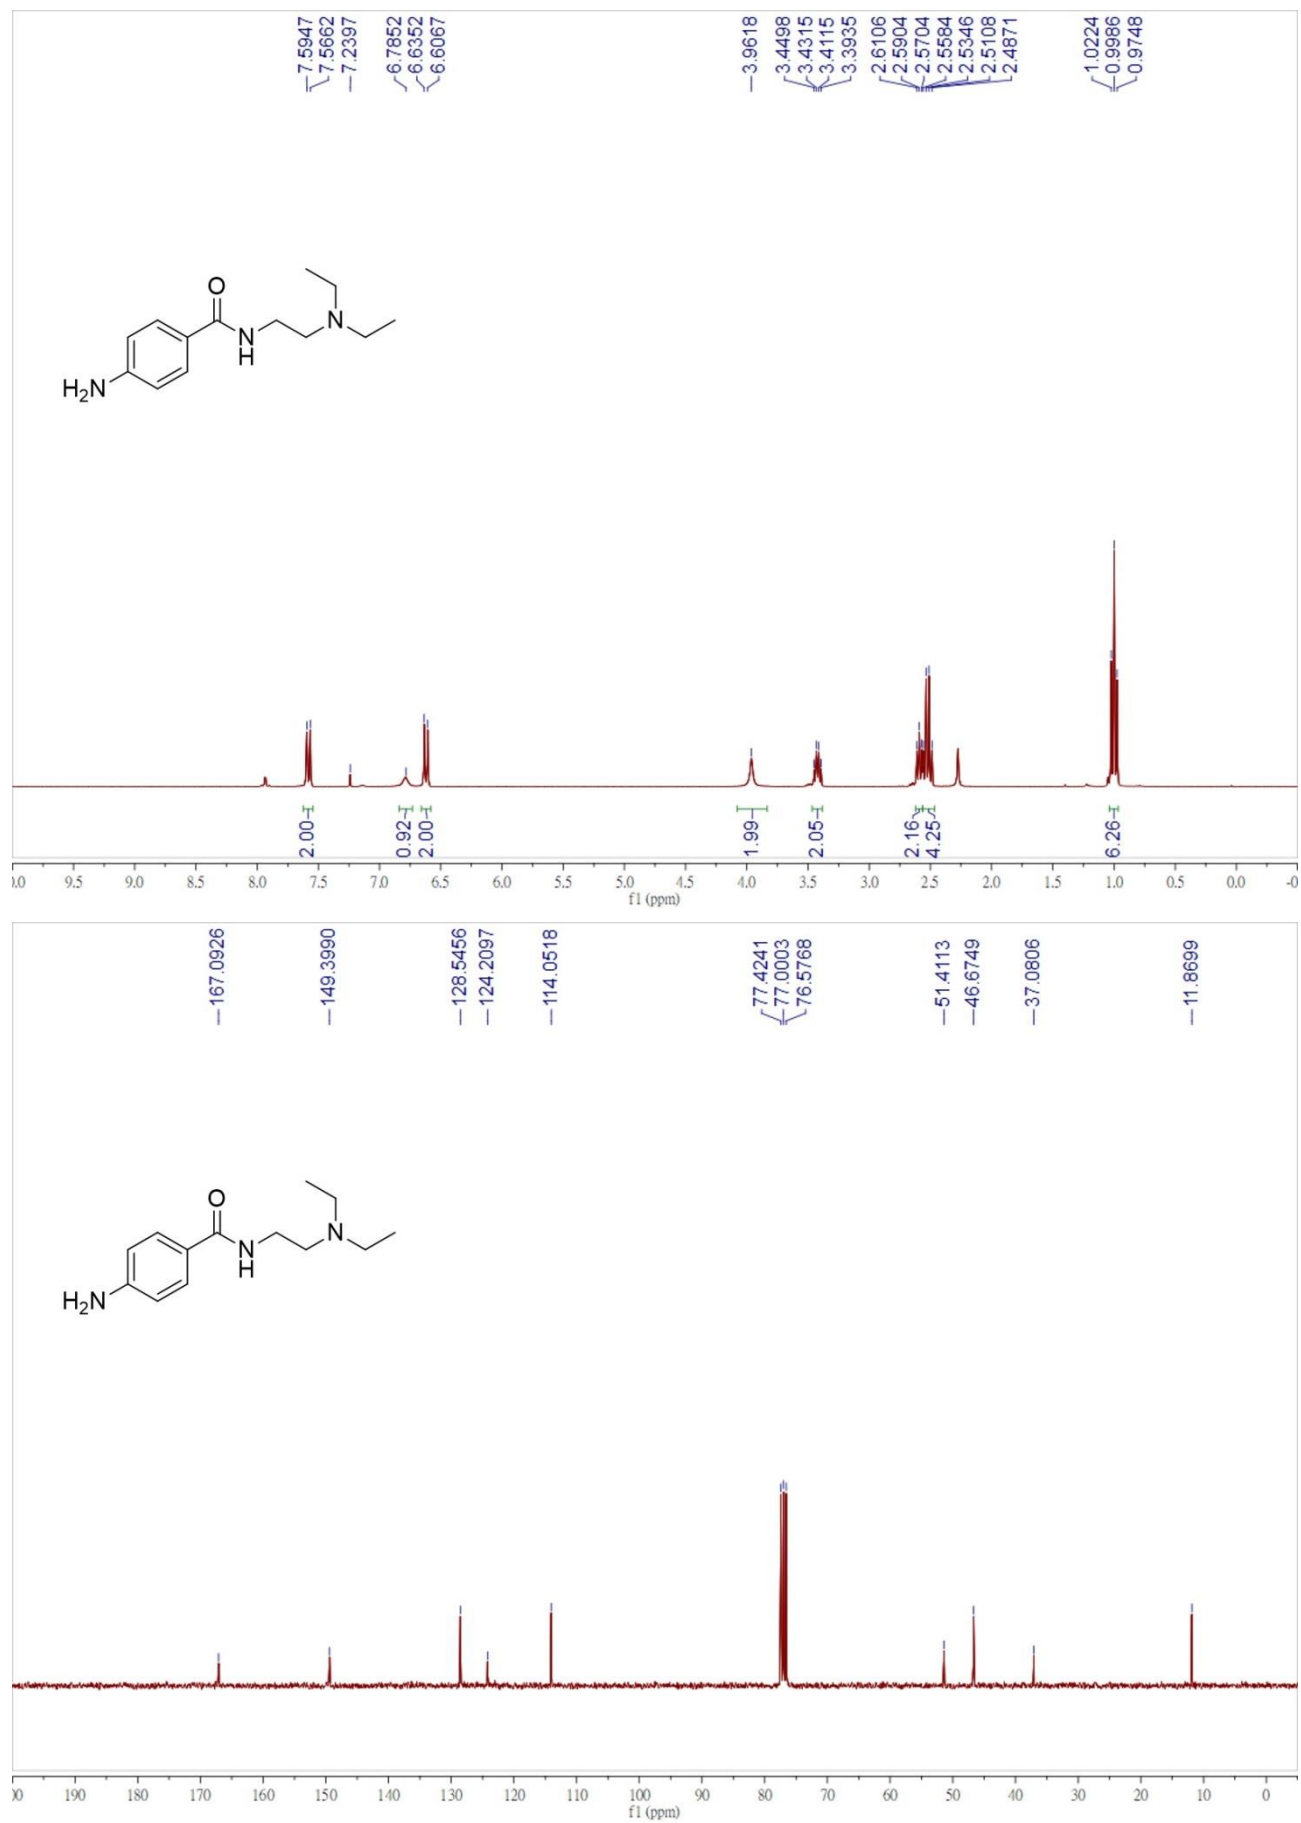

$^1\text{H}$  and  $^{13}\text{C}$  NMR spectra of compound **2q**

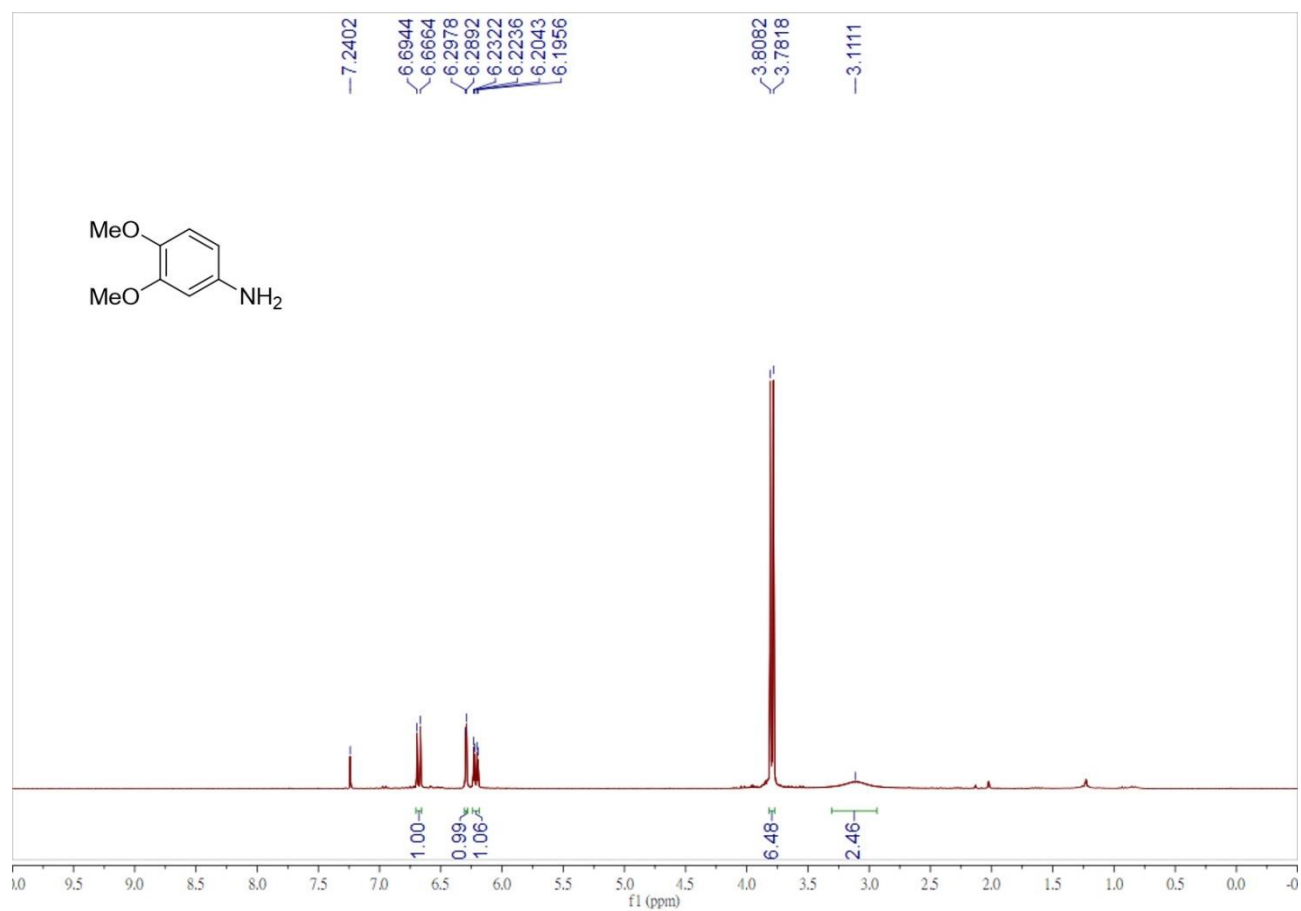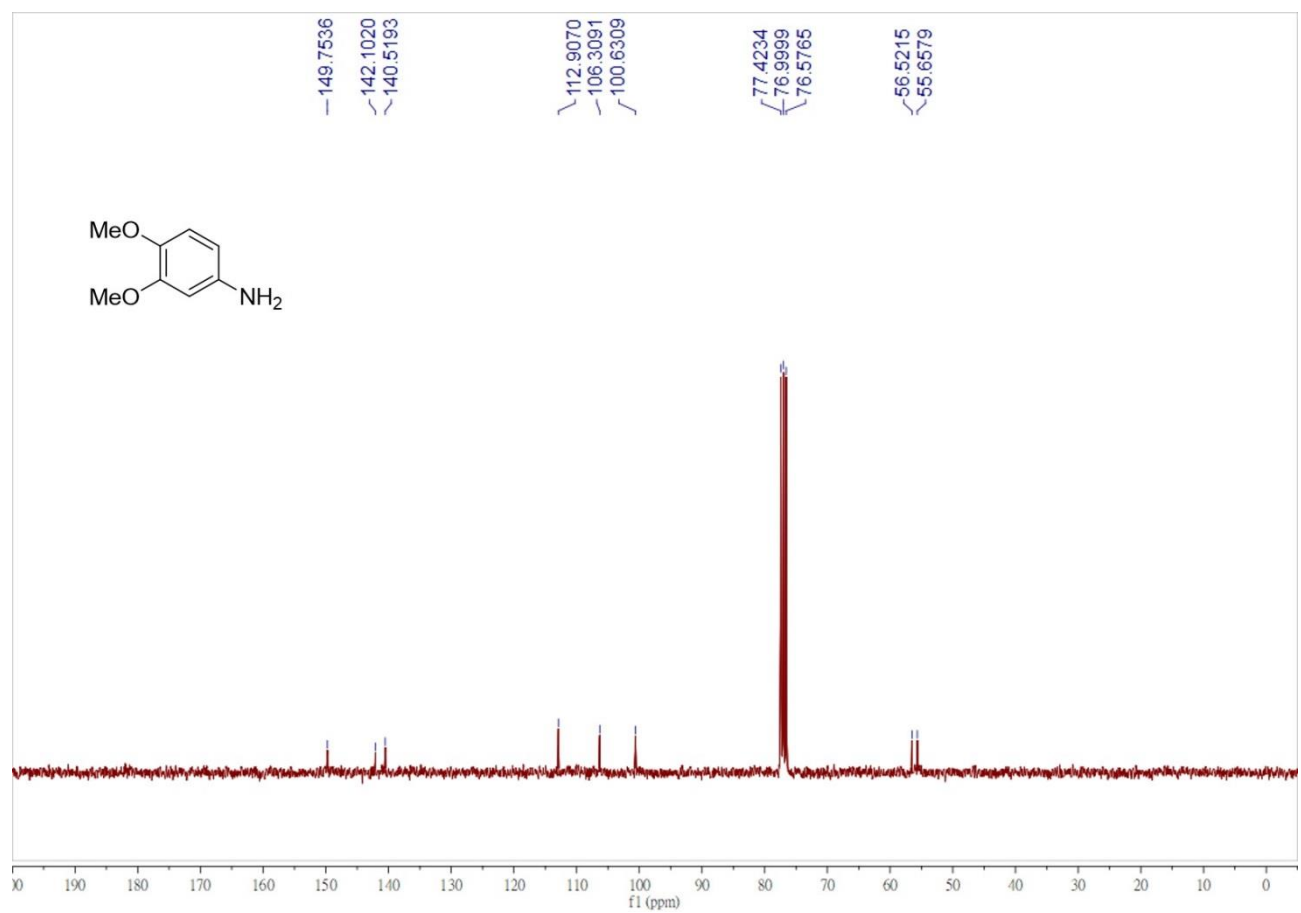

$^1\text{H}$  and  $^{13}\text{C}$  NMR spectra of compound **2r**

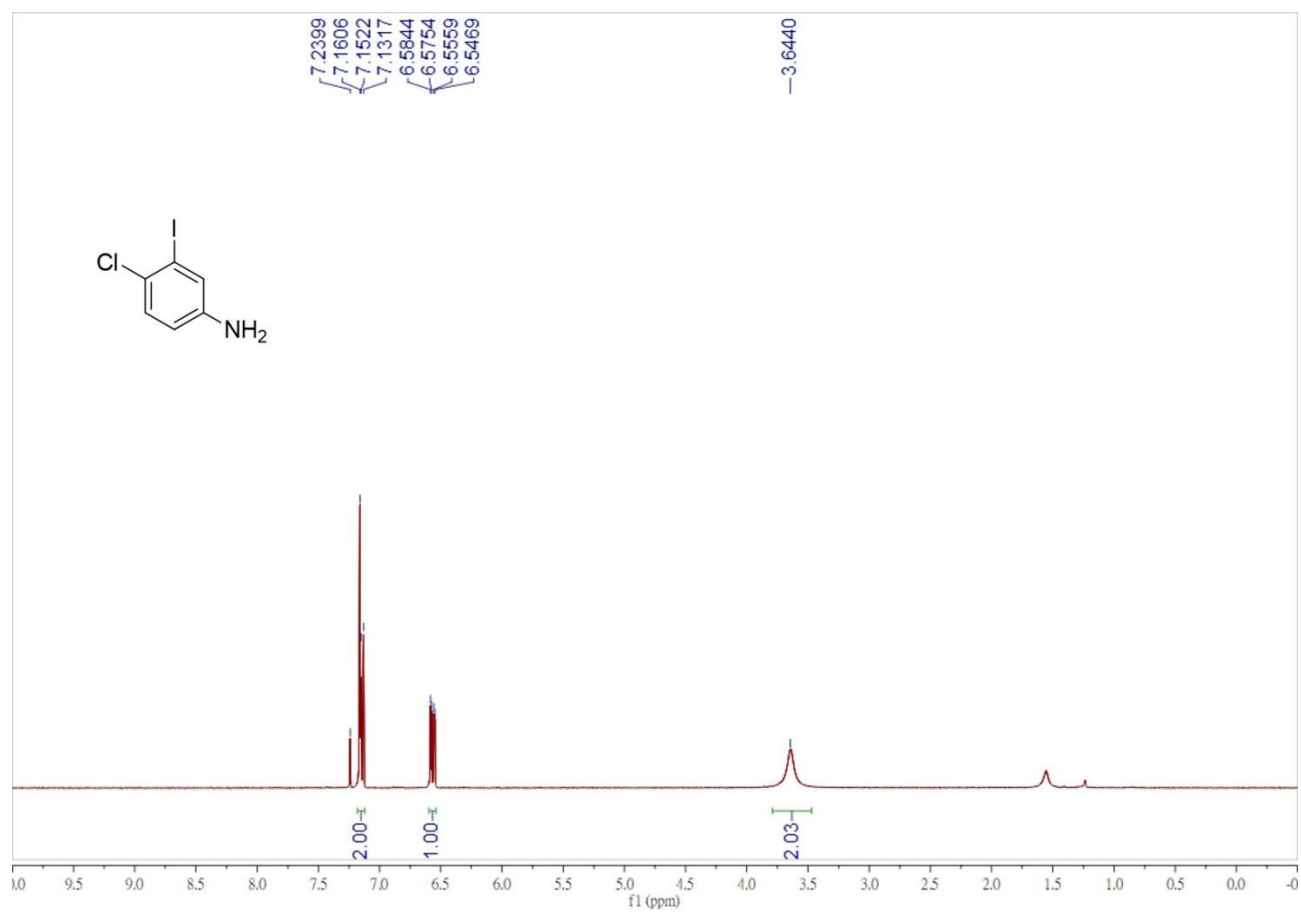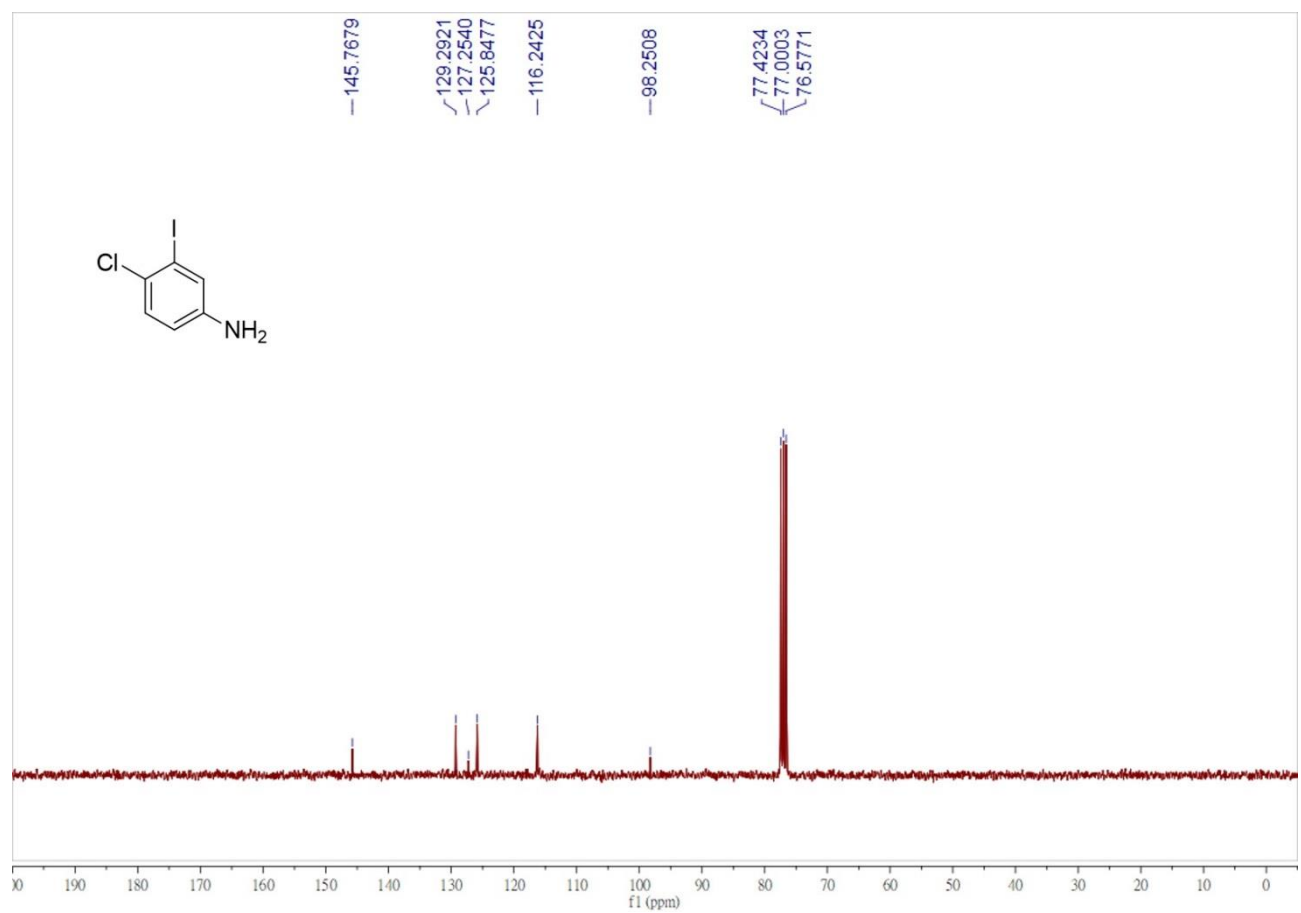

$^1\text{H}$  and  $^{13}\text{C}$  NMR spectra of compound **2s**

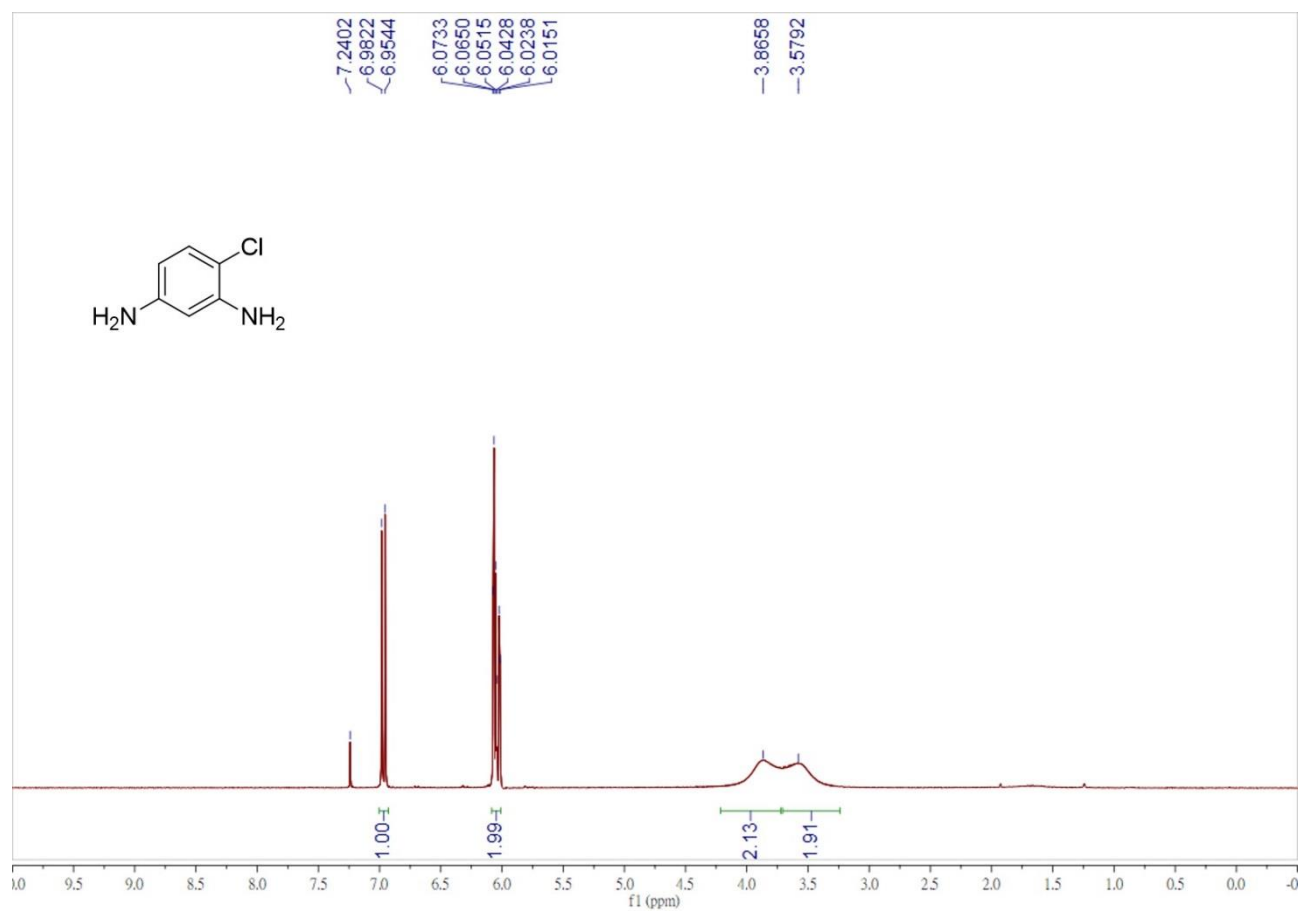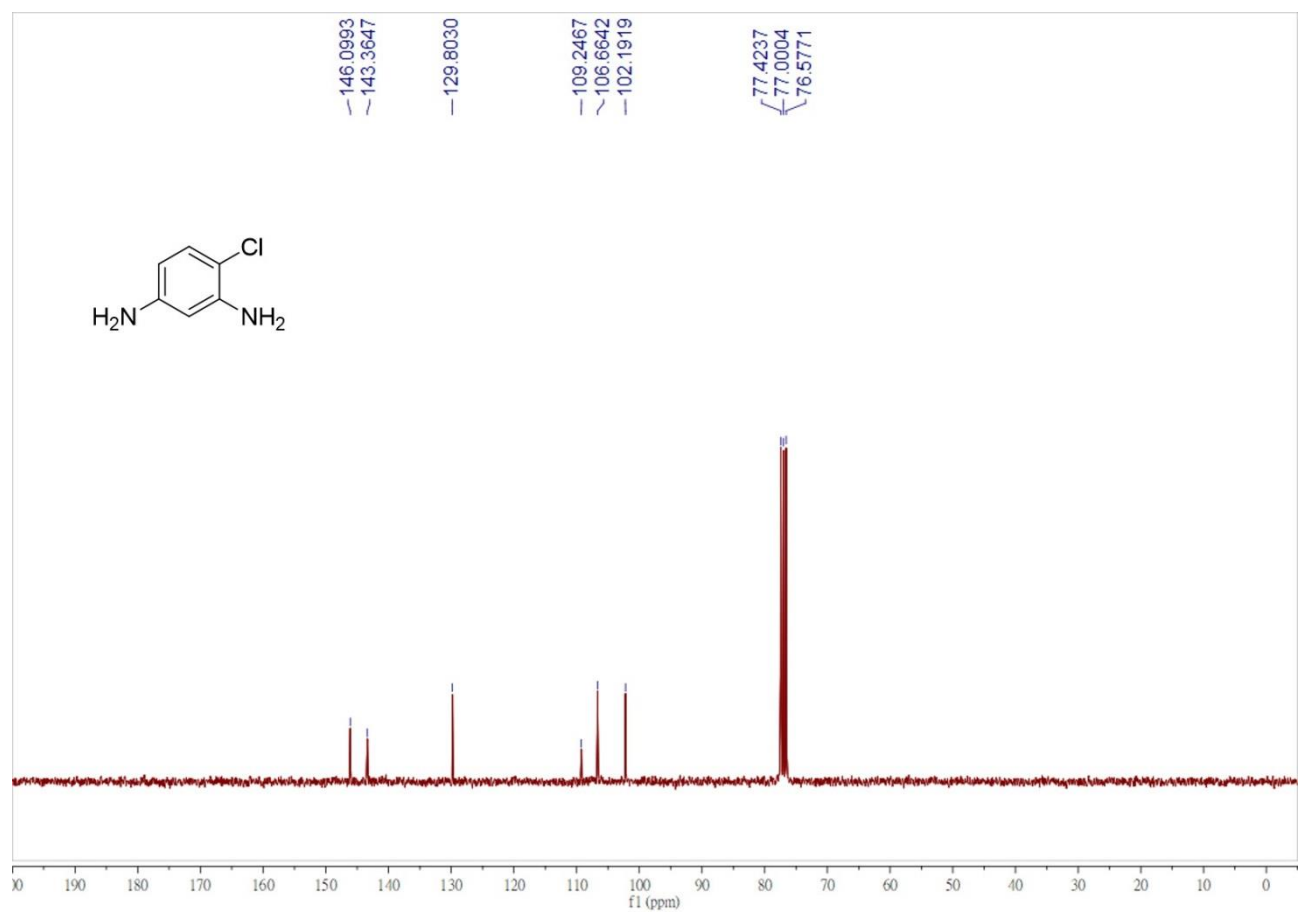

$^1\text{H}$  and  $^{13}\text{C}$  NMR spectra of compound **2t**

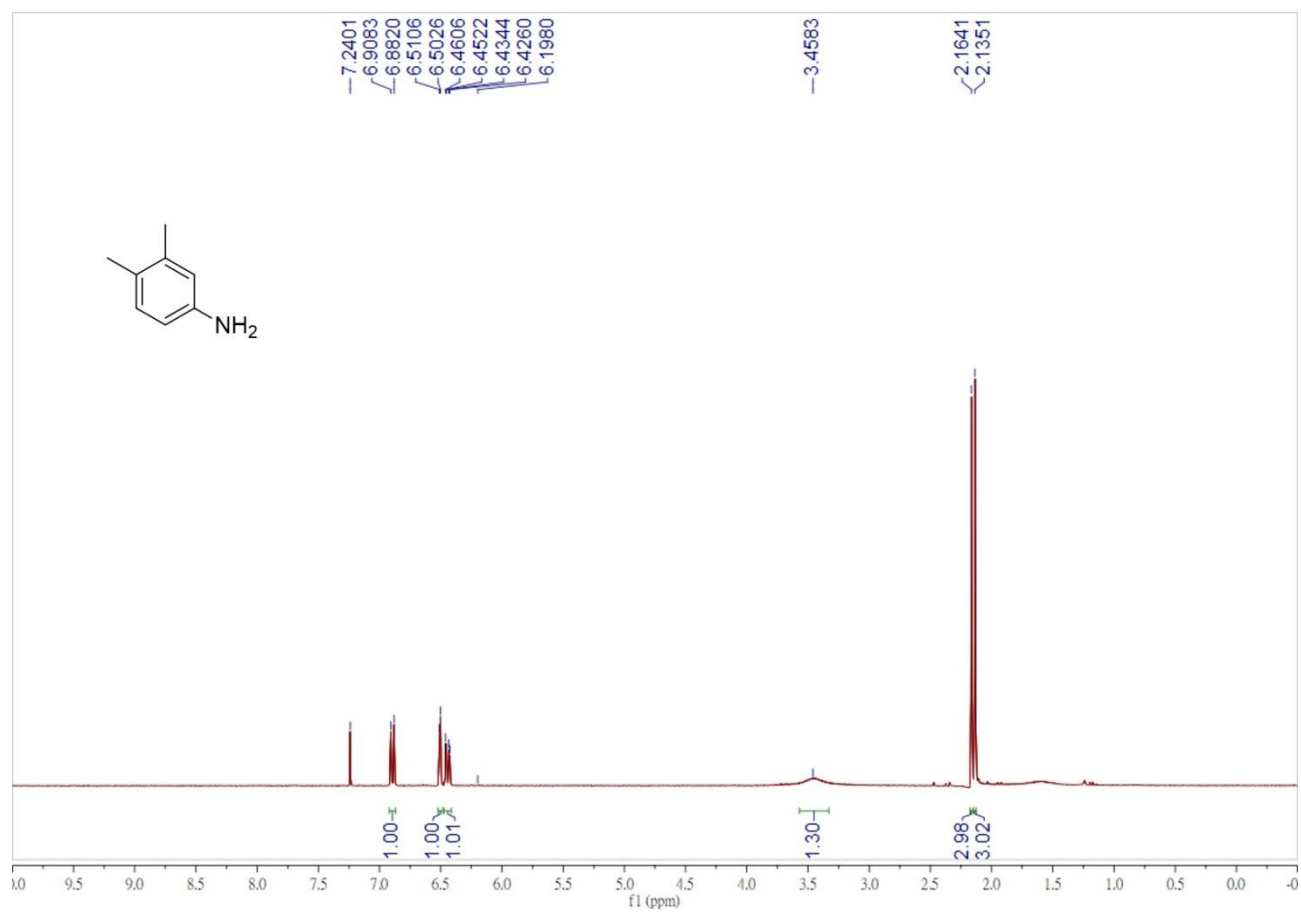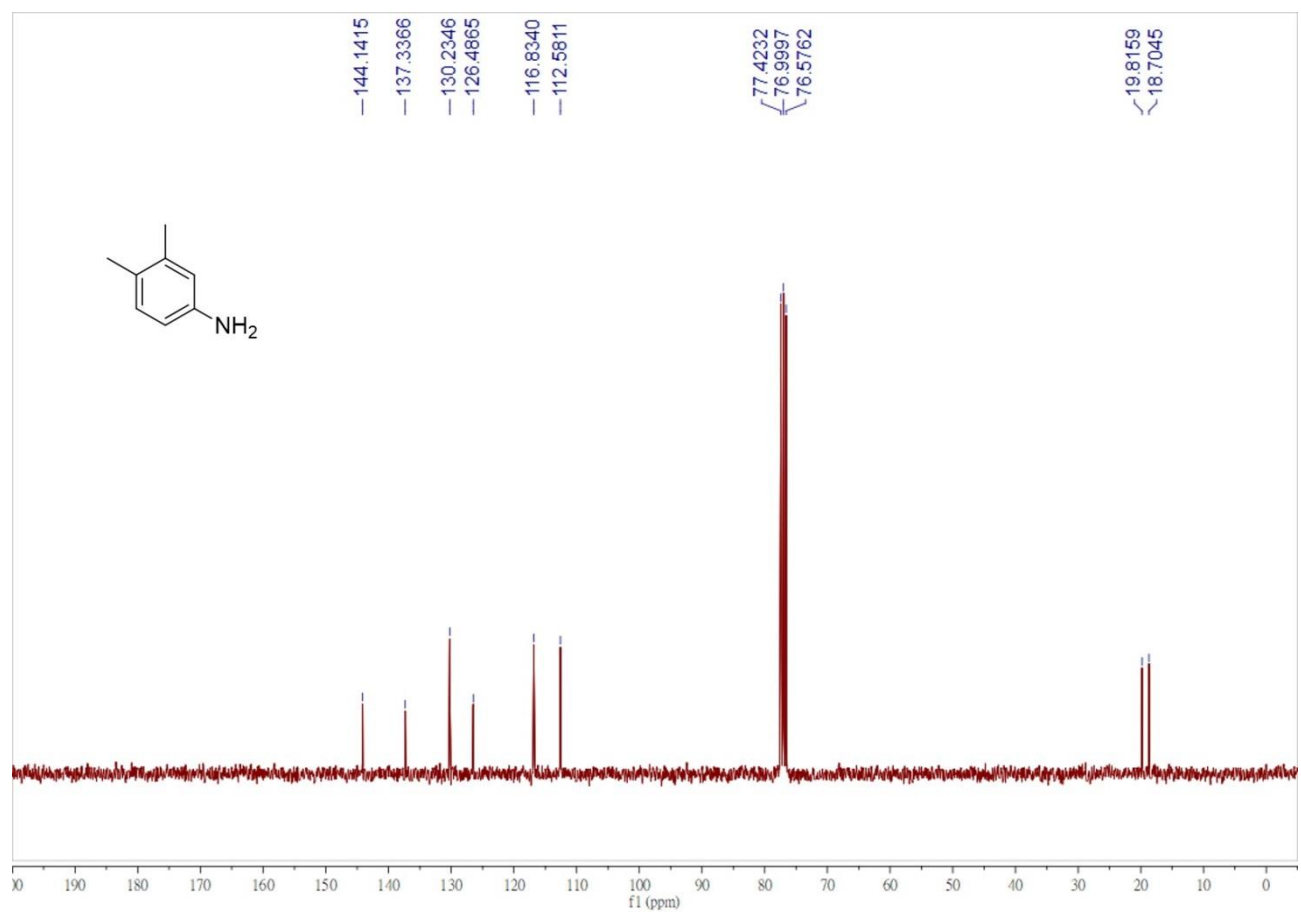

$^1\text{H}$  and  $^{13}\text{C}$  NMR spectra of compound **2u**

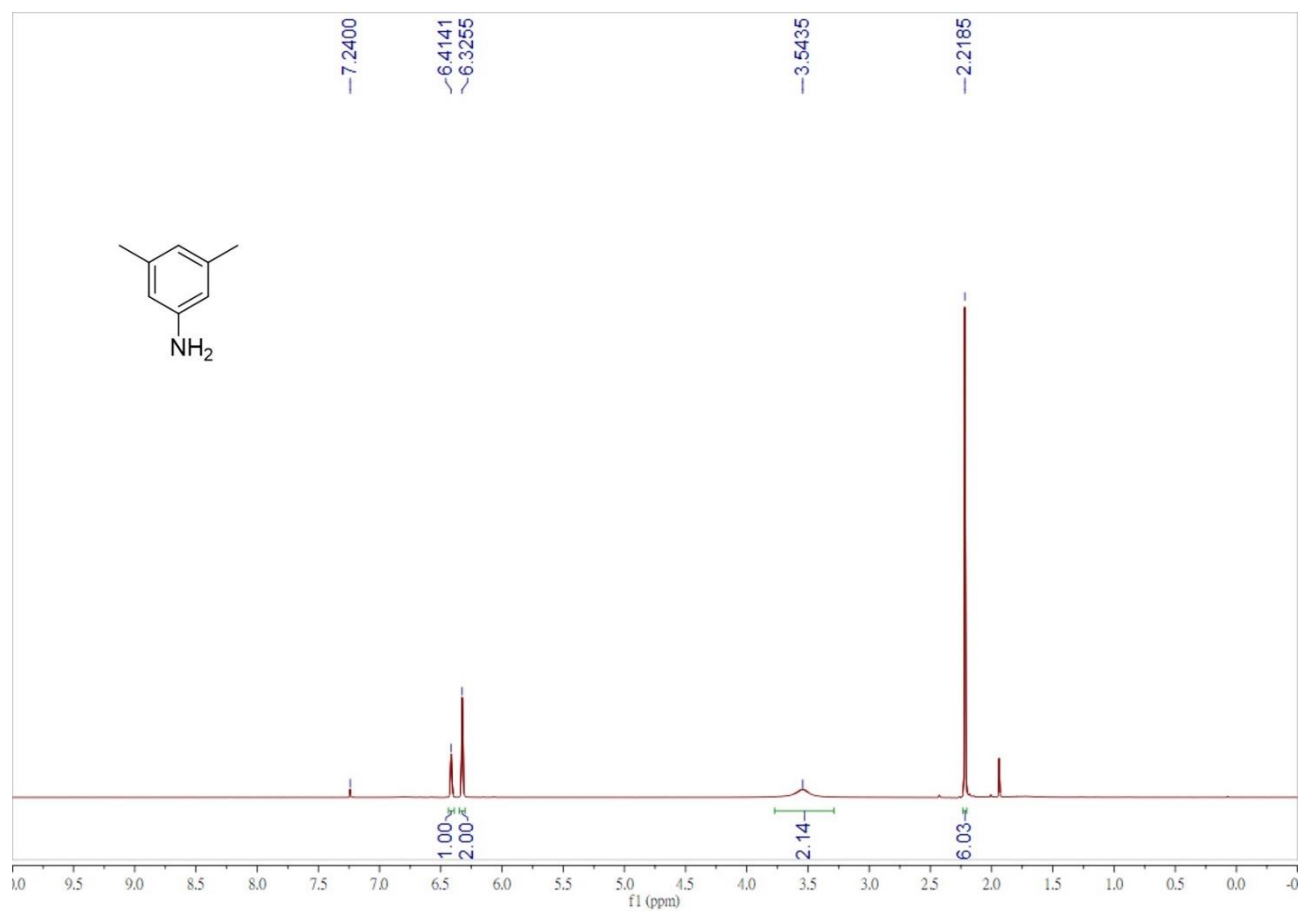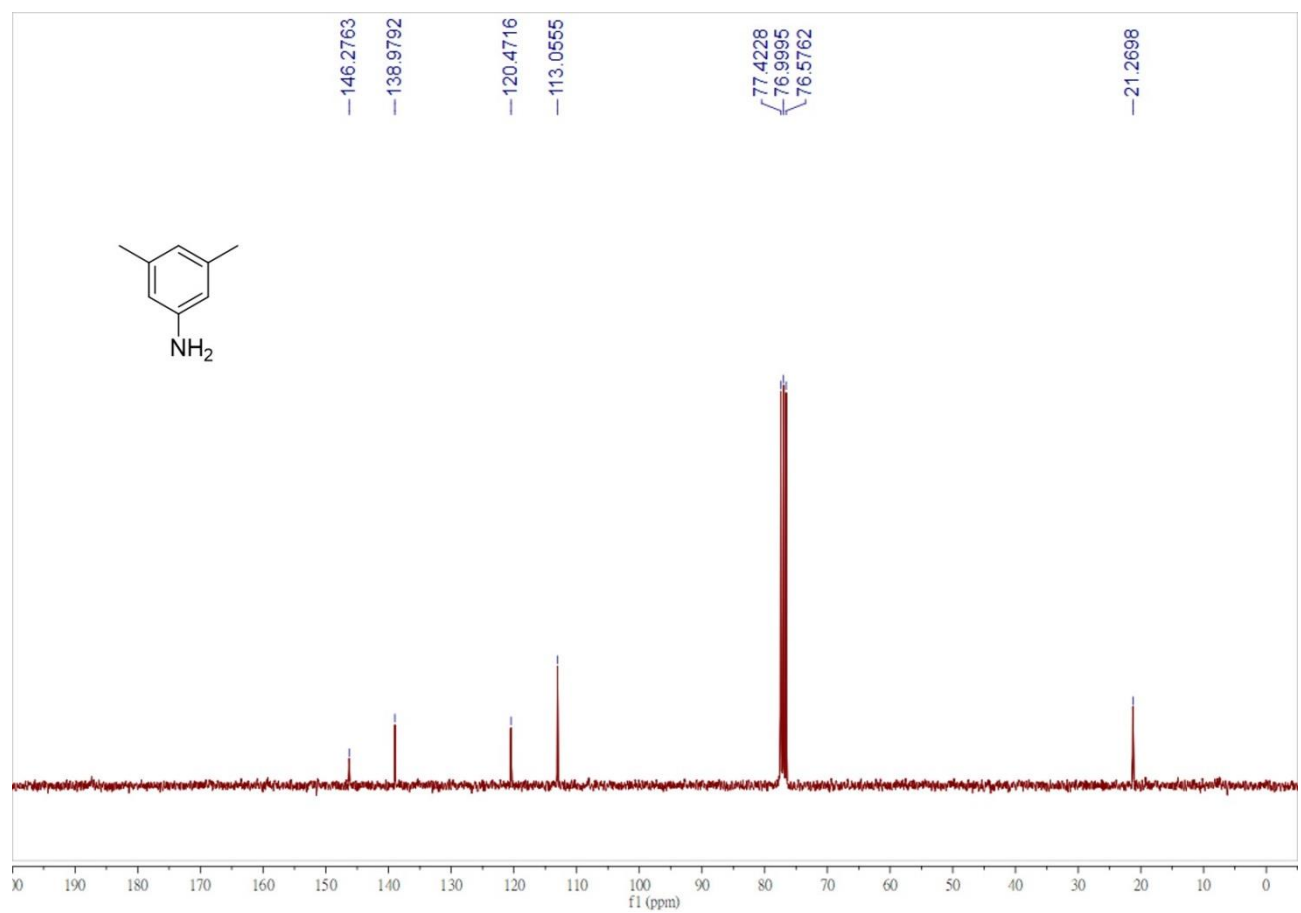



$^1\text{H}$  and  $^{13}\text{C}$  NMR spectra of compound **2v**

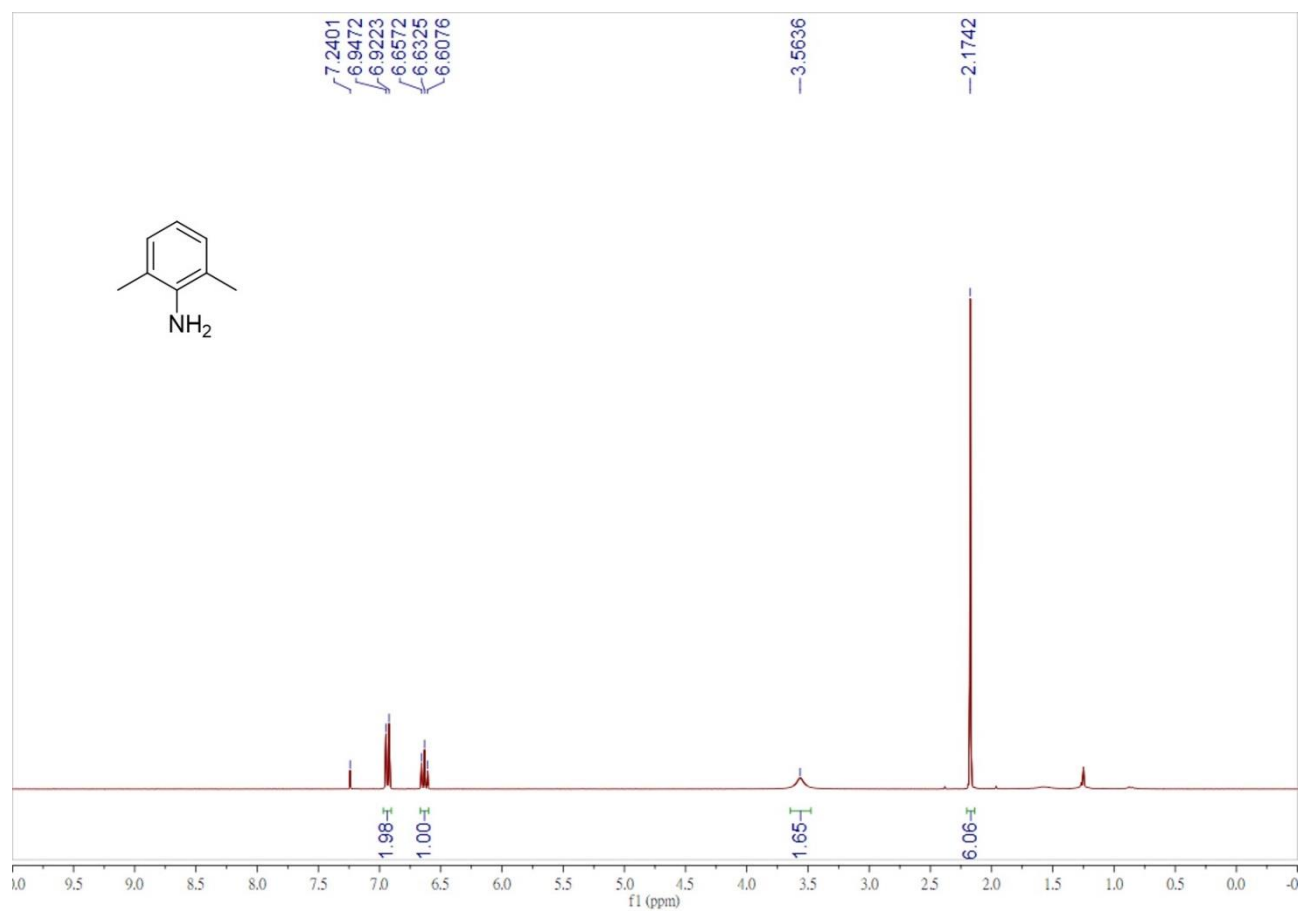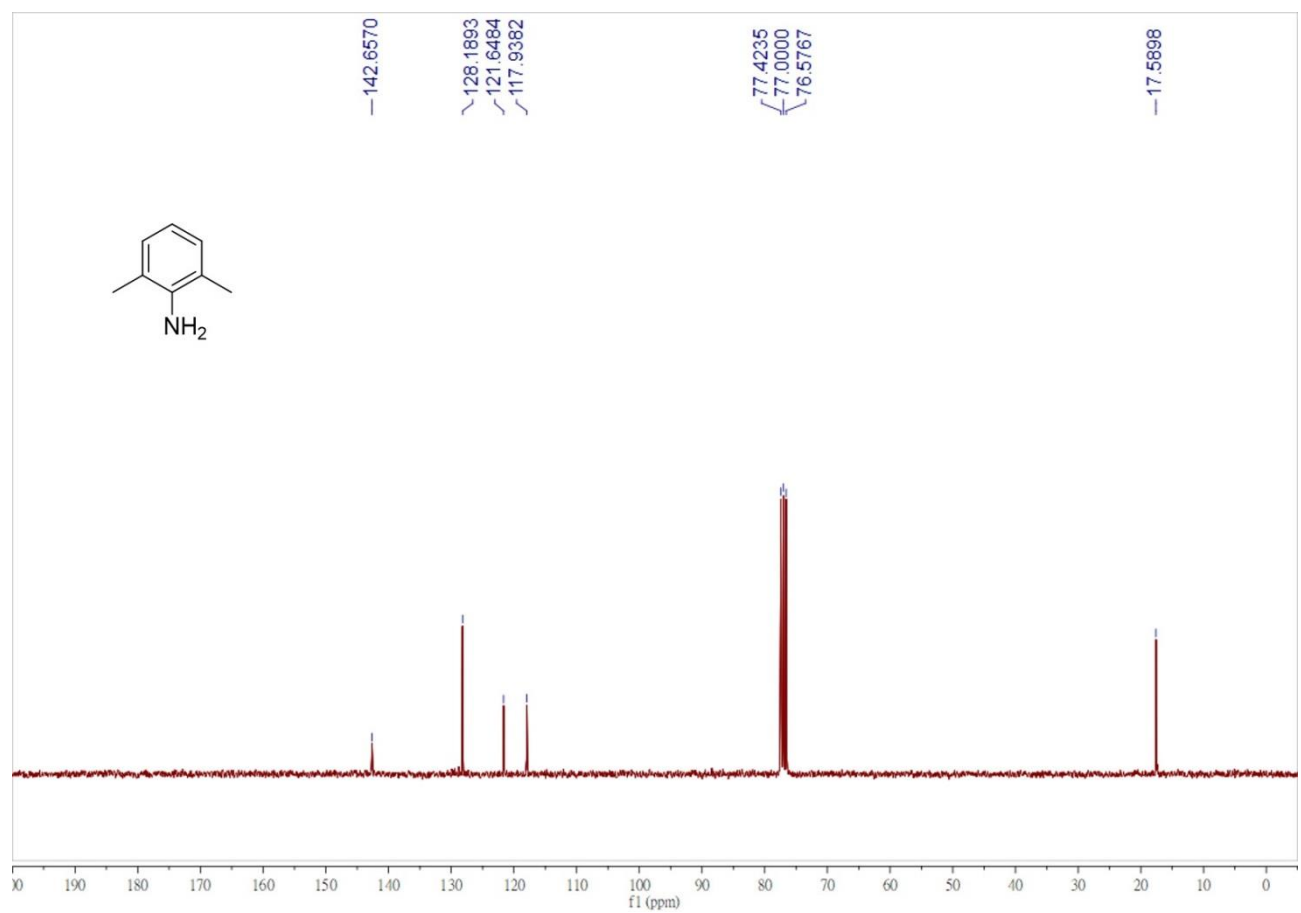

$^1\text{H}$  and  $^{13}\text{C}$  NMR spectra of compound **2w**

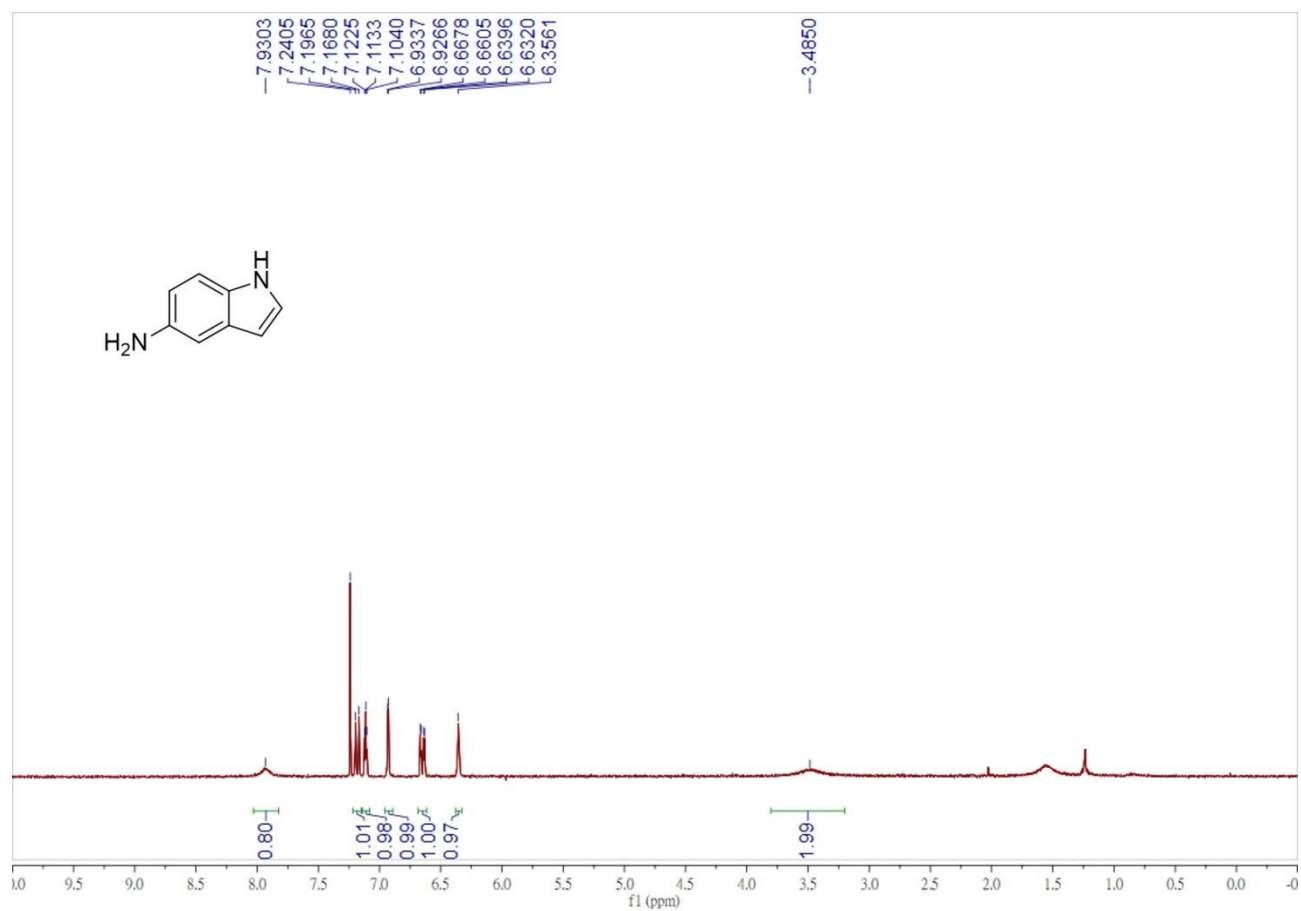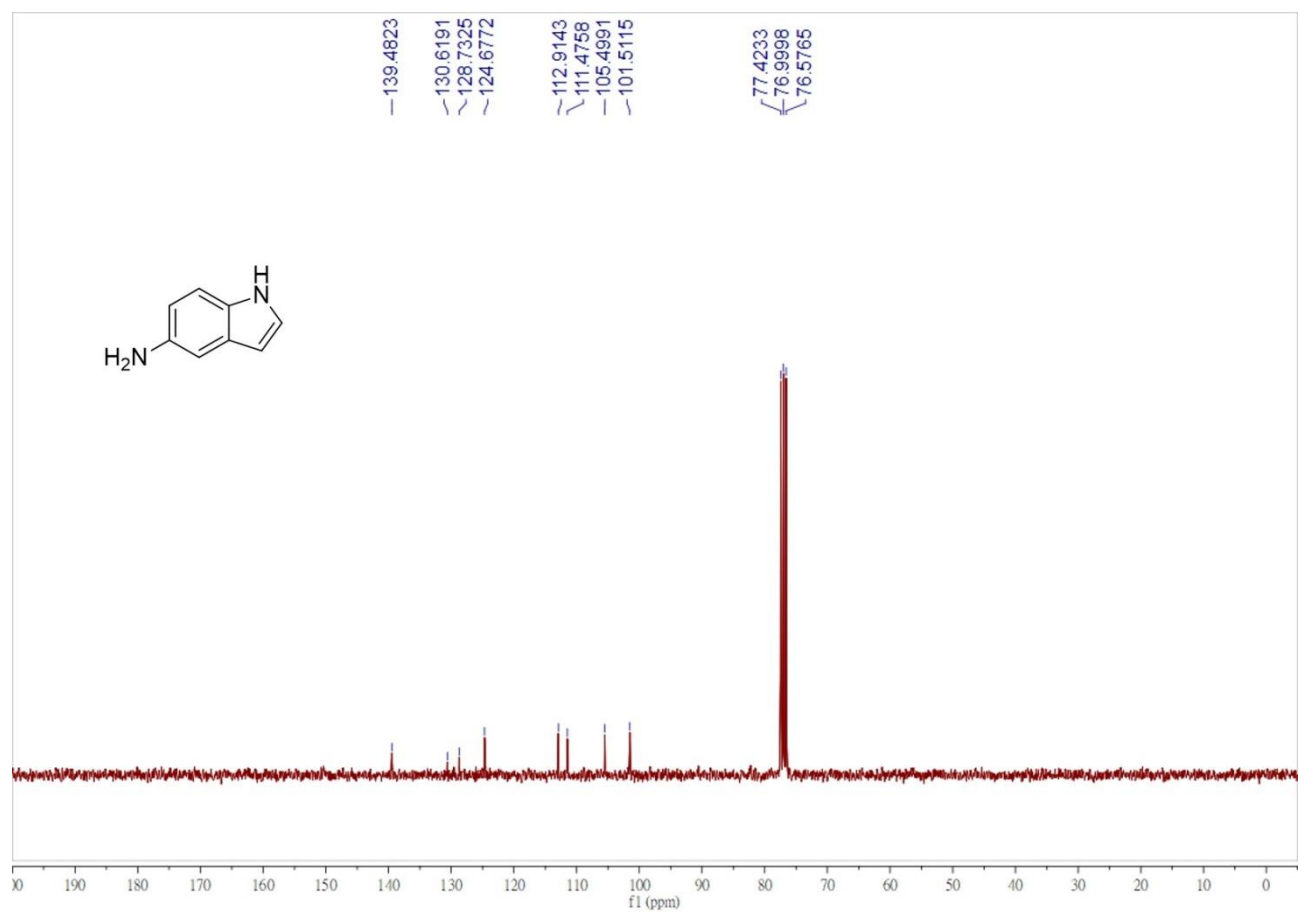

$^1\text{H}$  and  $^{13}\text{C}$  NMR spectra of compound **2x**

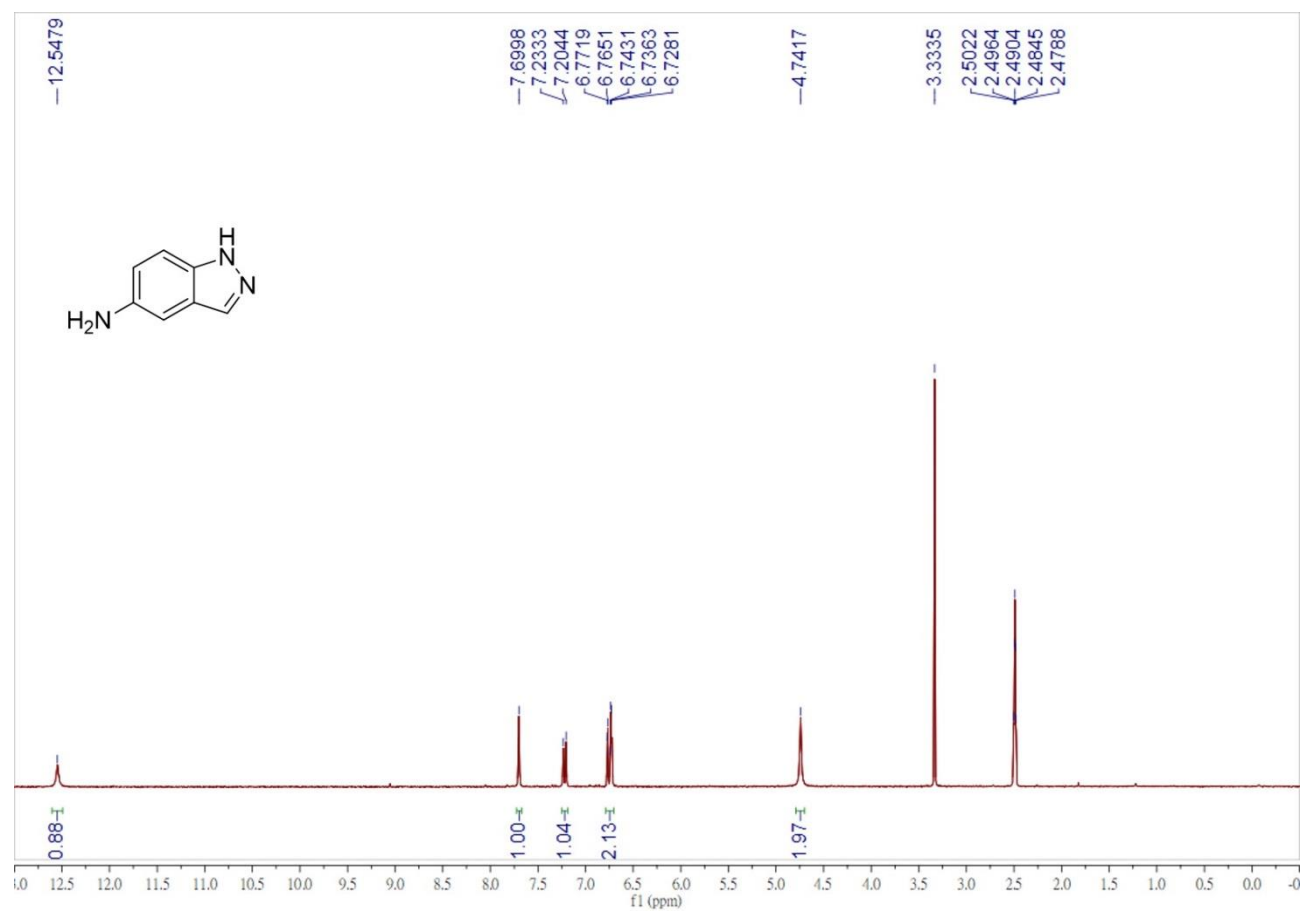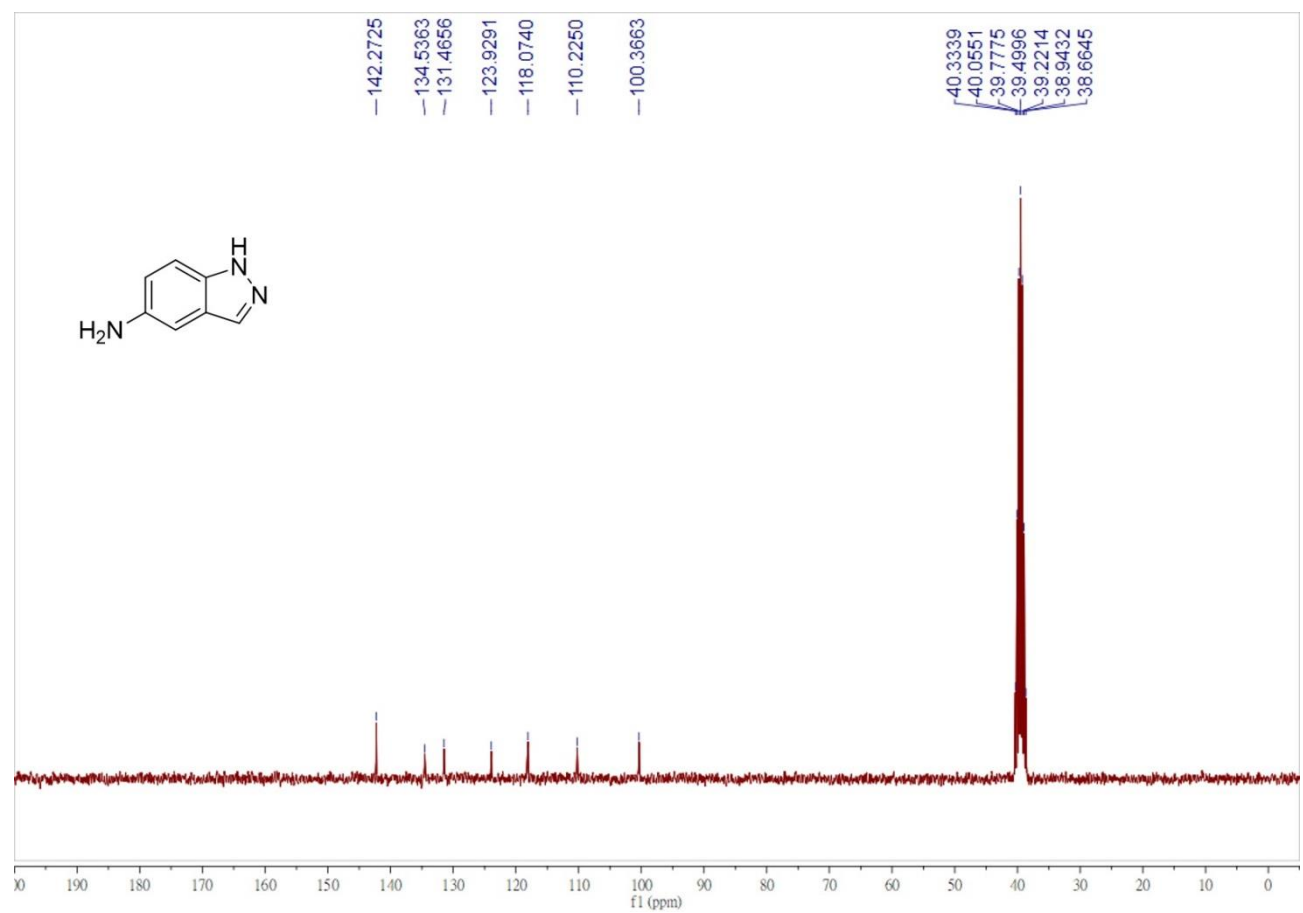

$^1\text{H}$  and  $^{13}\text{C}$  NMR spectra of compound **2y**

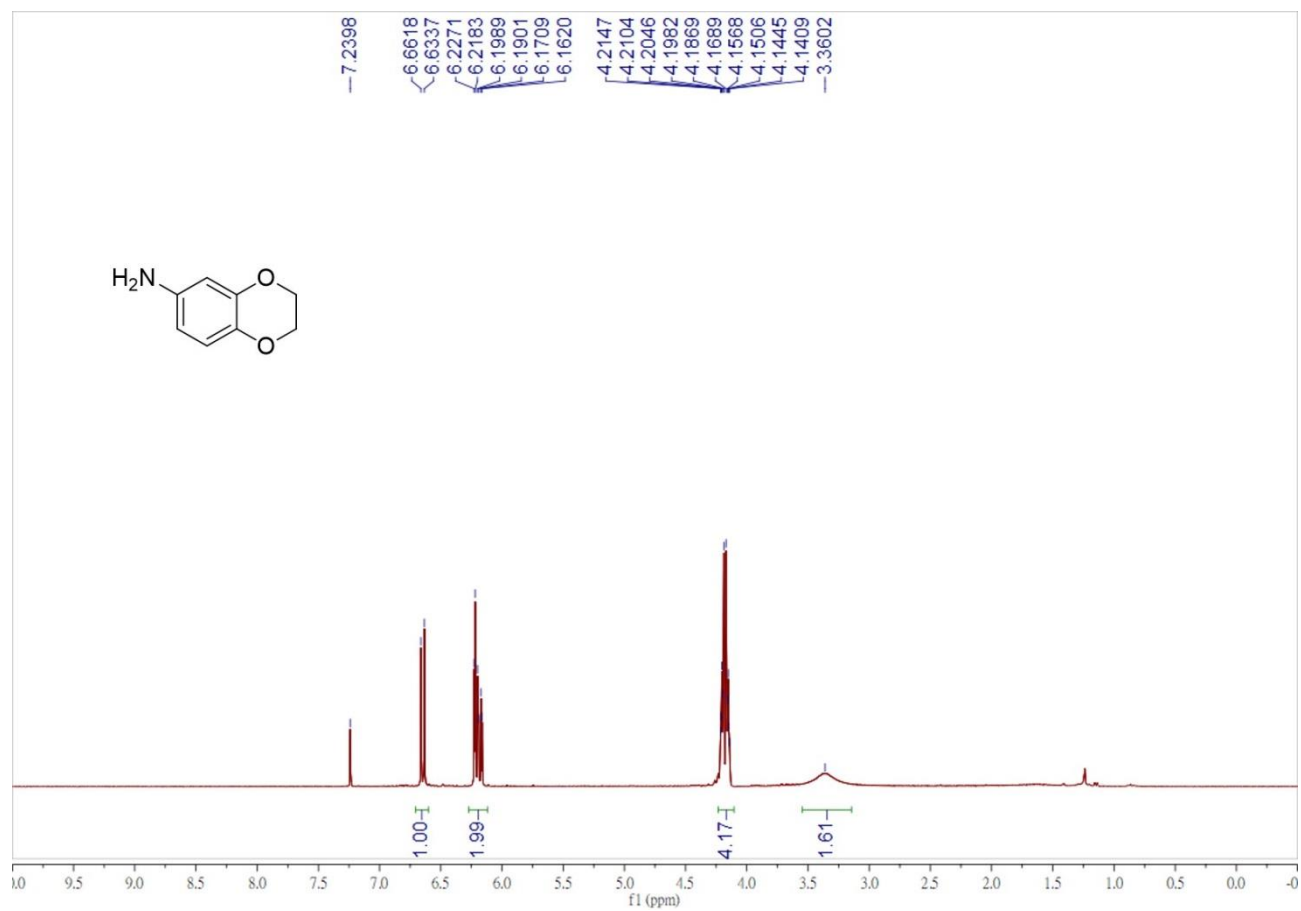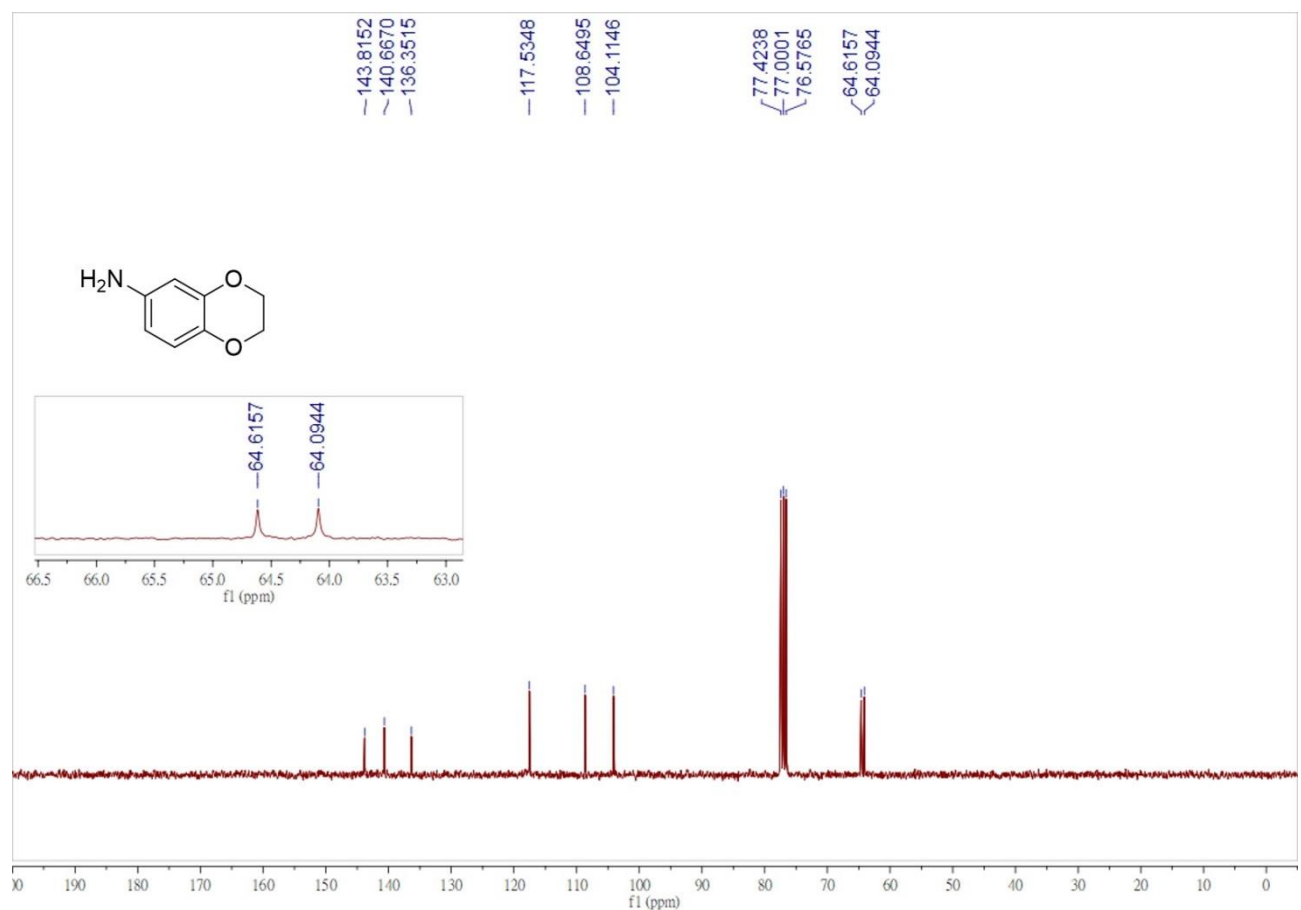

$^1\text{H}$  and  $^{13}\text{C}$  NMR spectra of compound **2z**

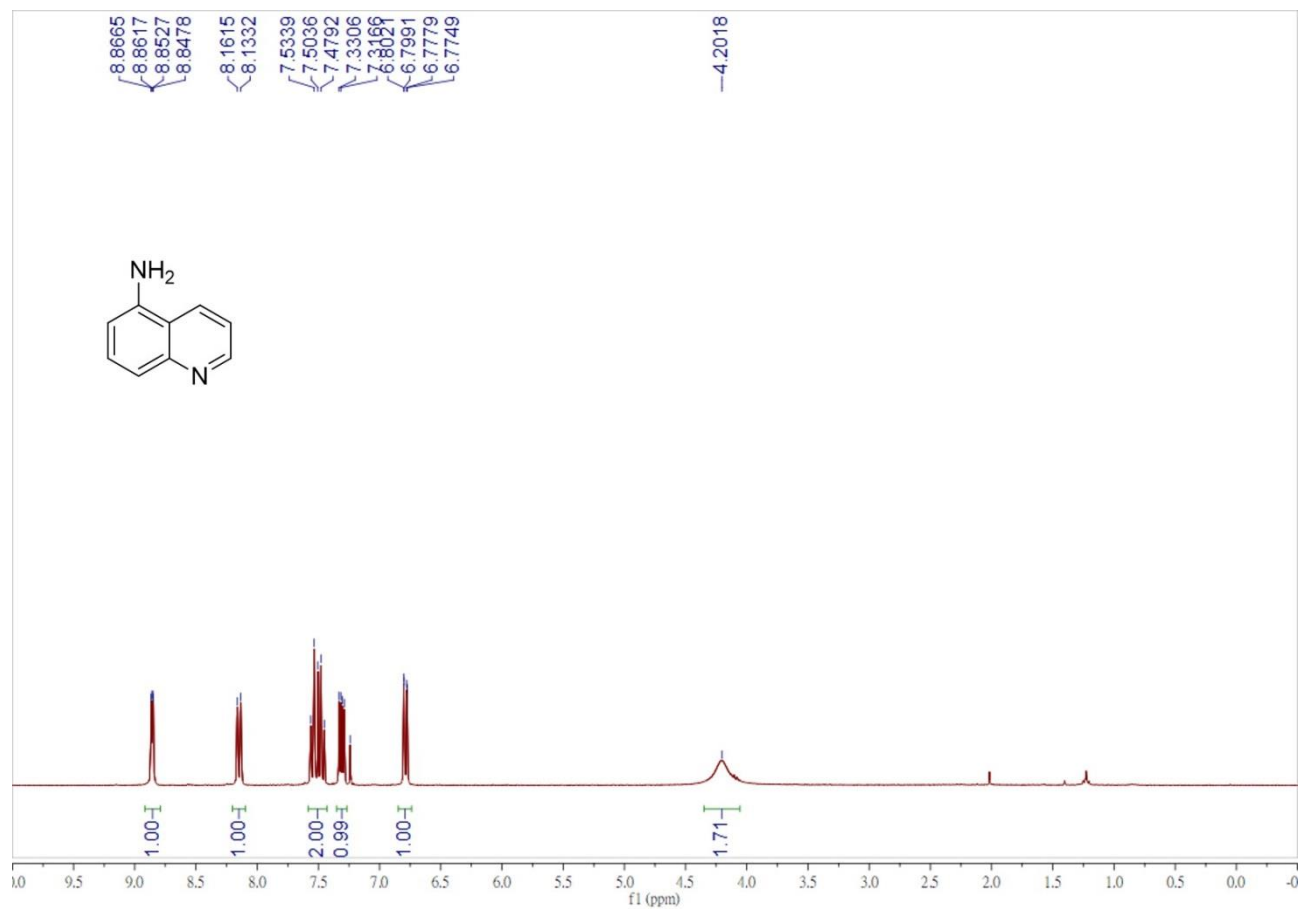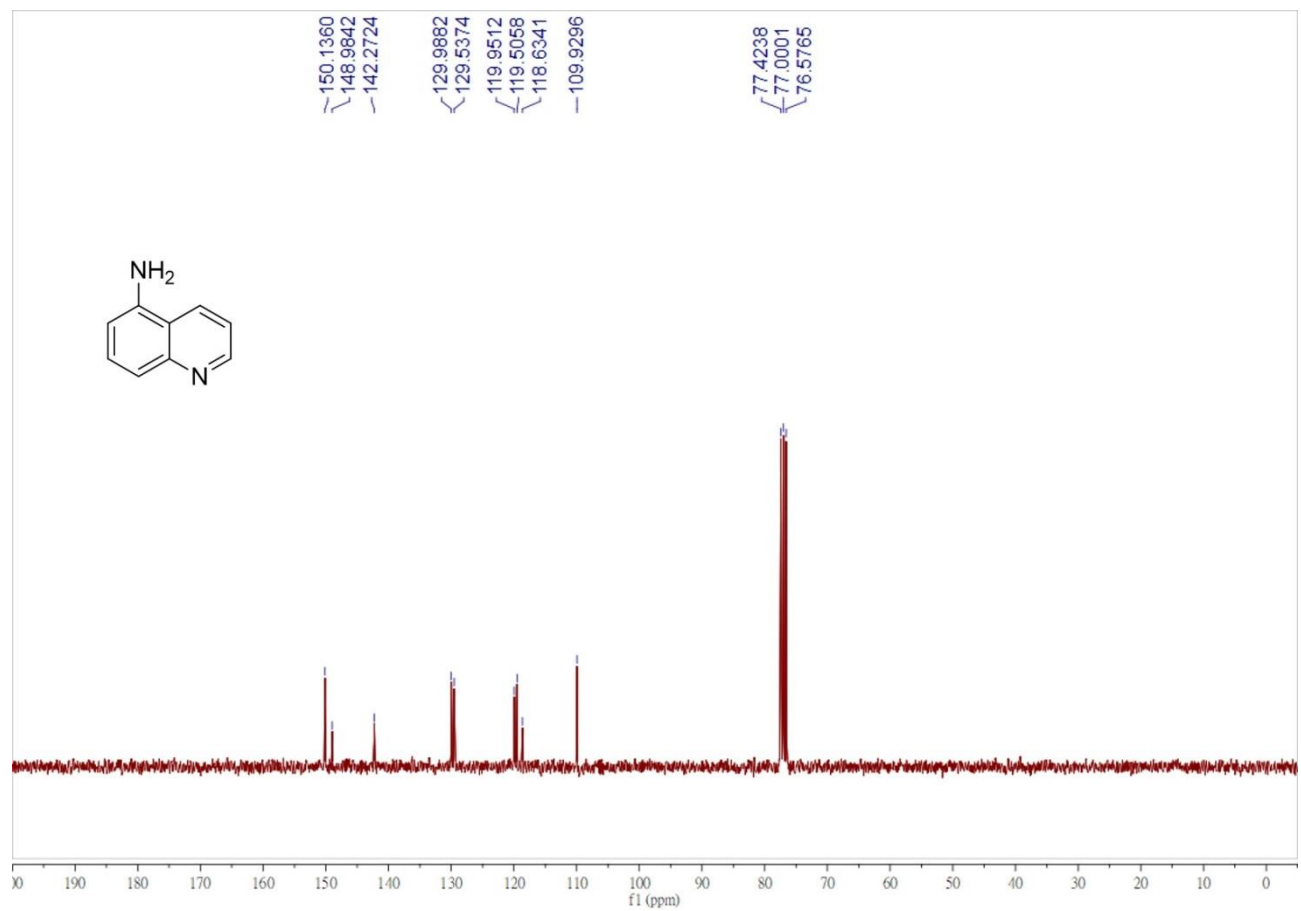

$^1\text{H}$  and  $^{13}\text{C}$  NMR spectra of compound **4a**

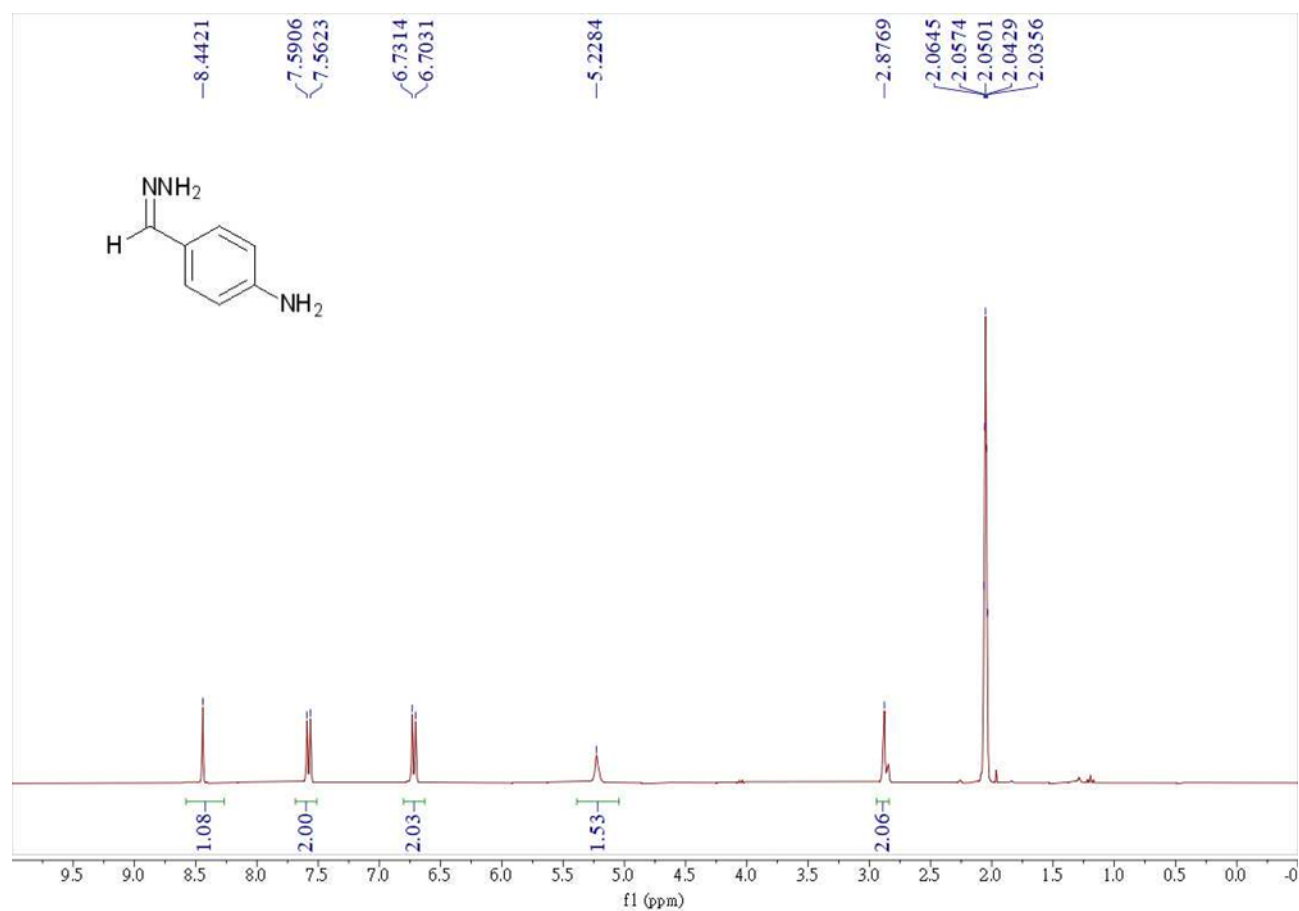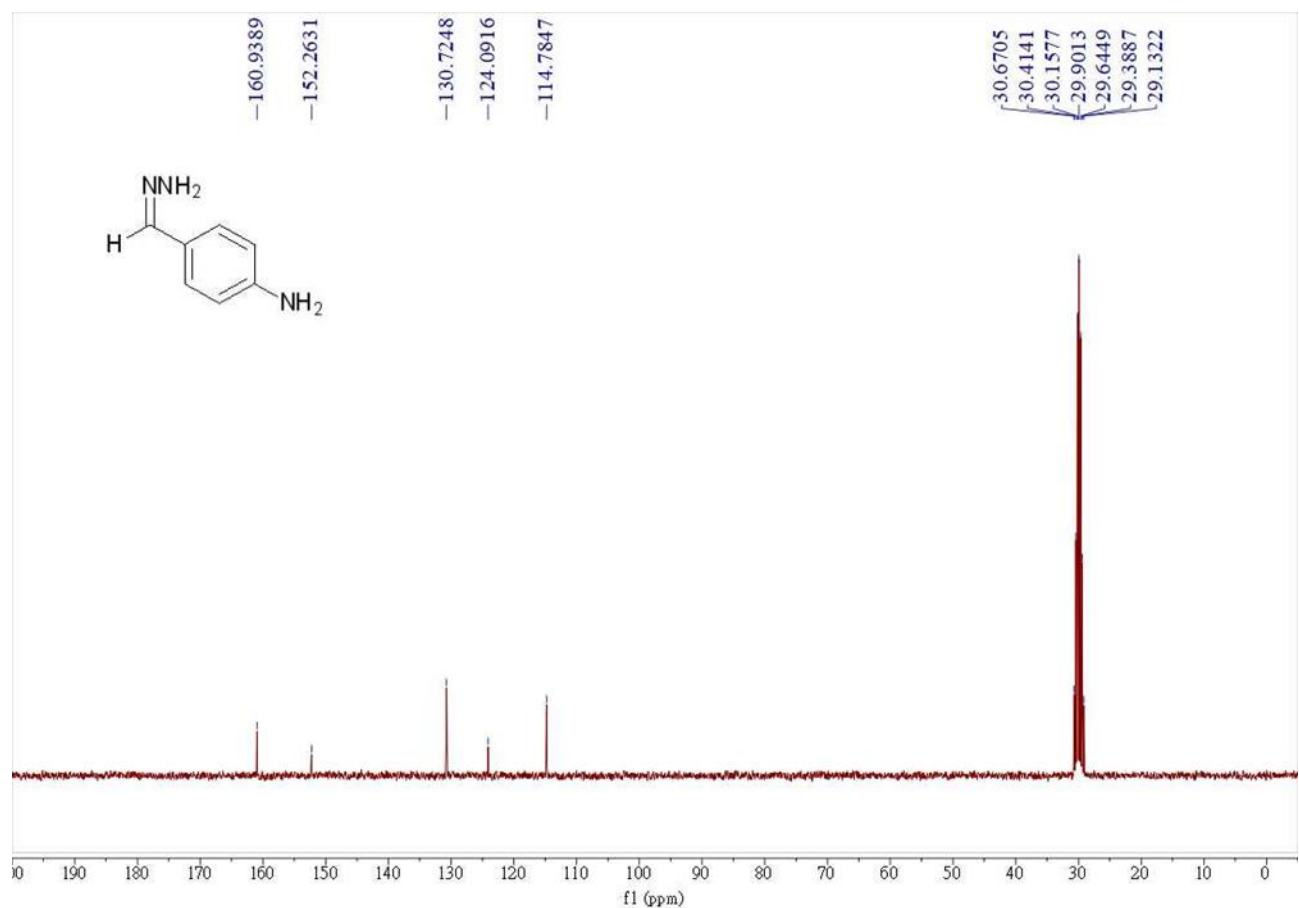

$^1\text{H}$  and  $^{13}\text{C}$  NMR spectra of compound **4b**

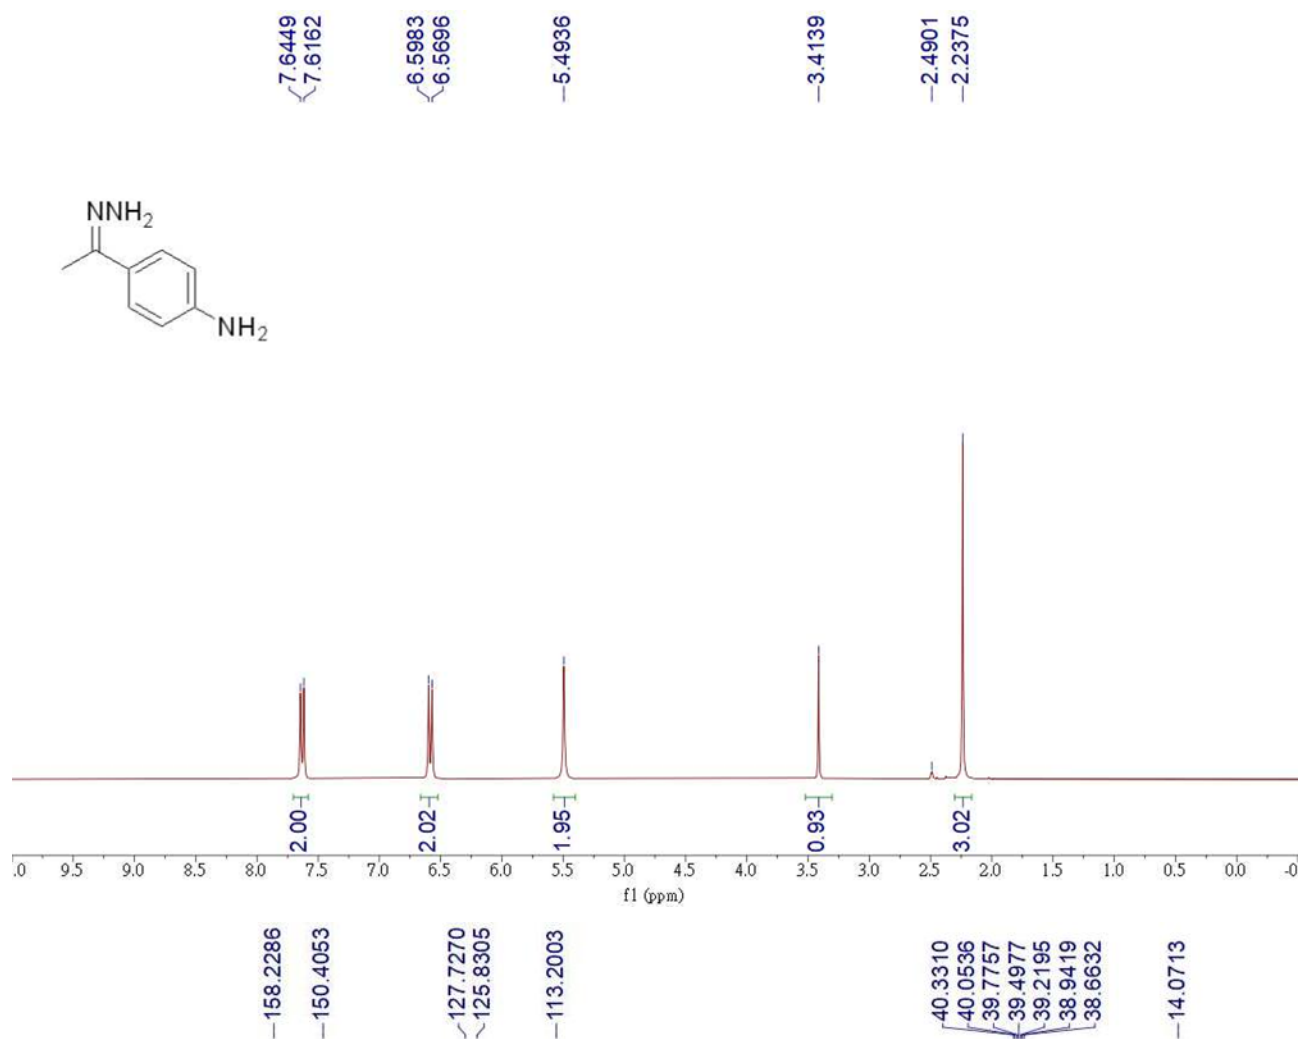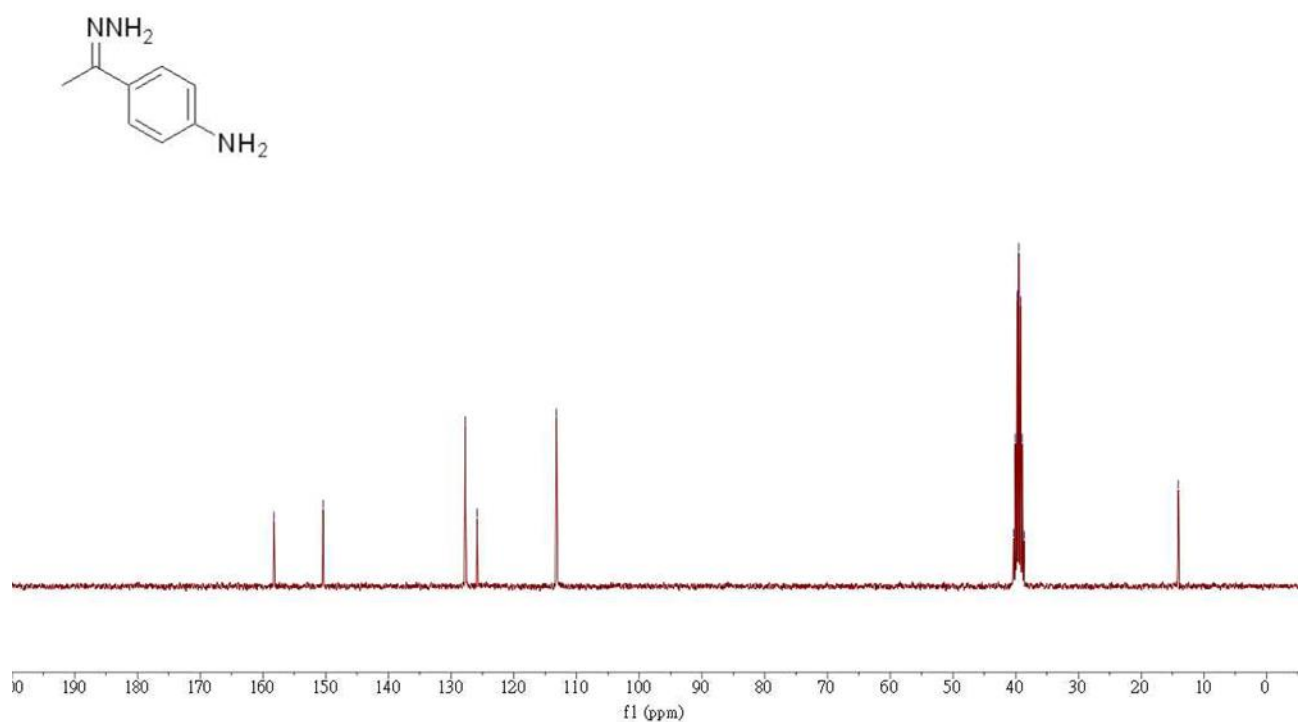

$^1\text{H}$  and  $^{13}\text{C}$  NMR spectra of compound **4c'**

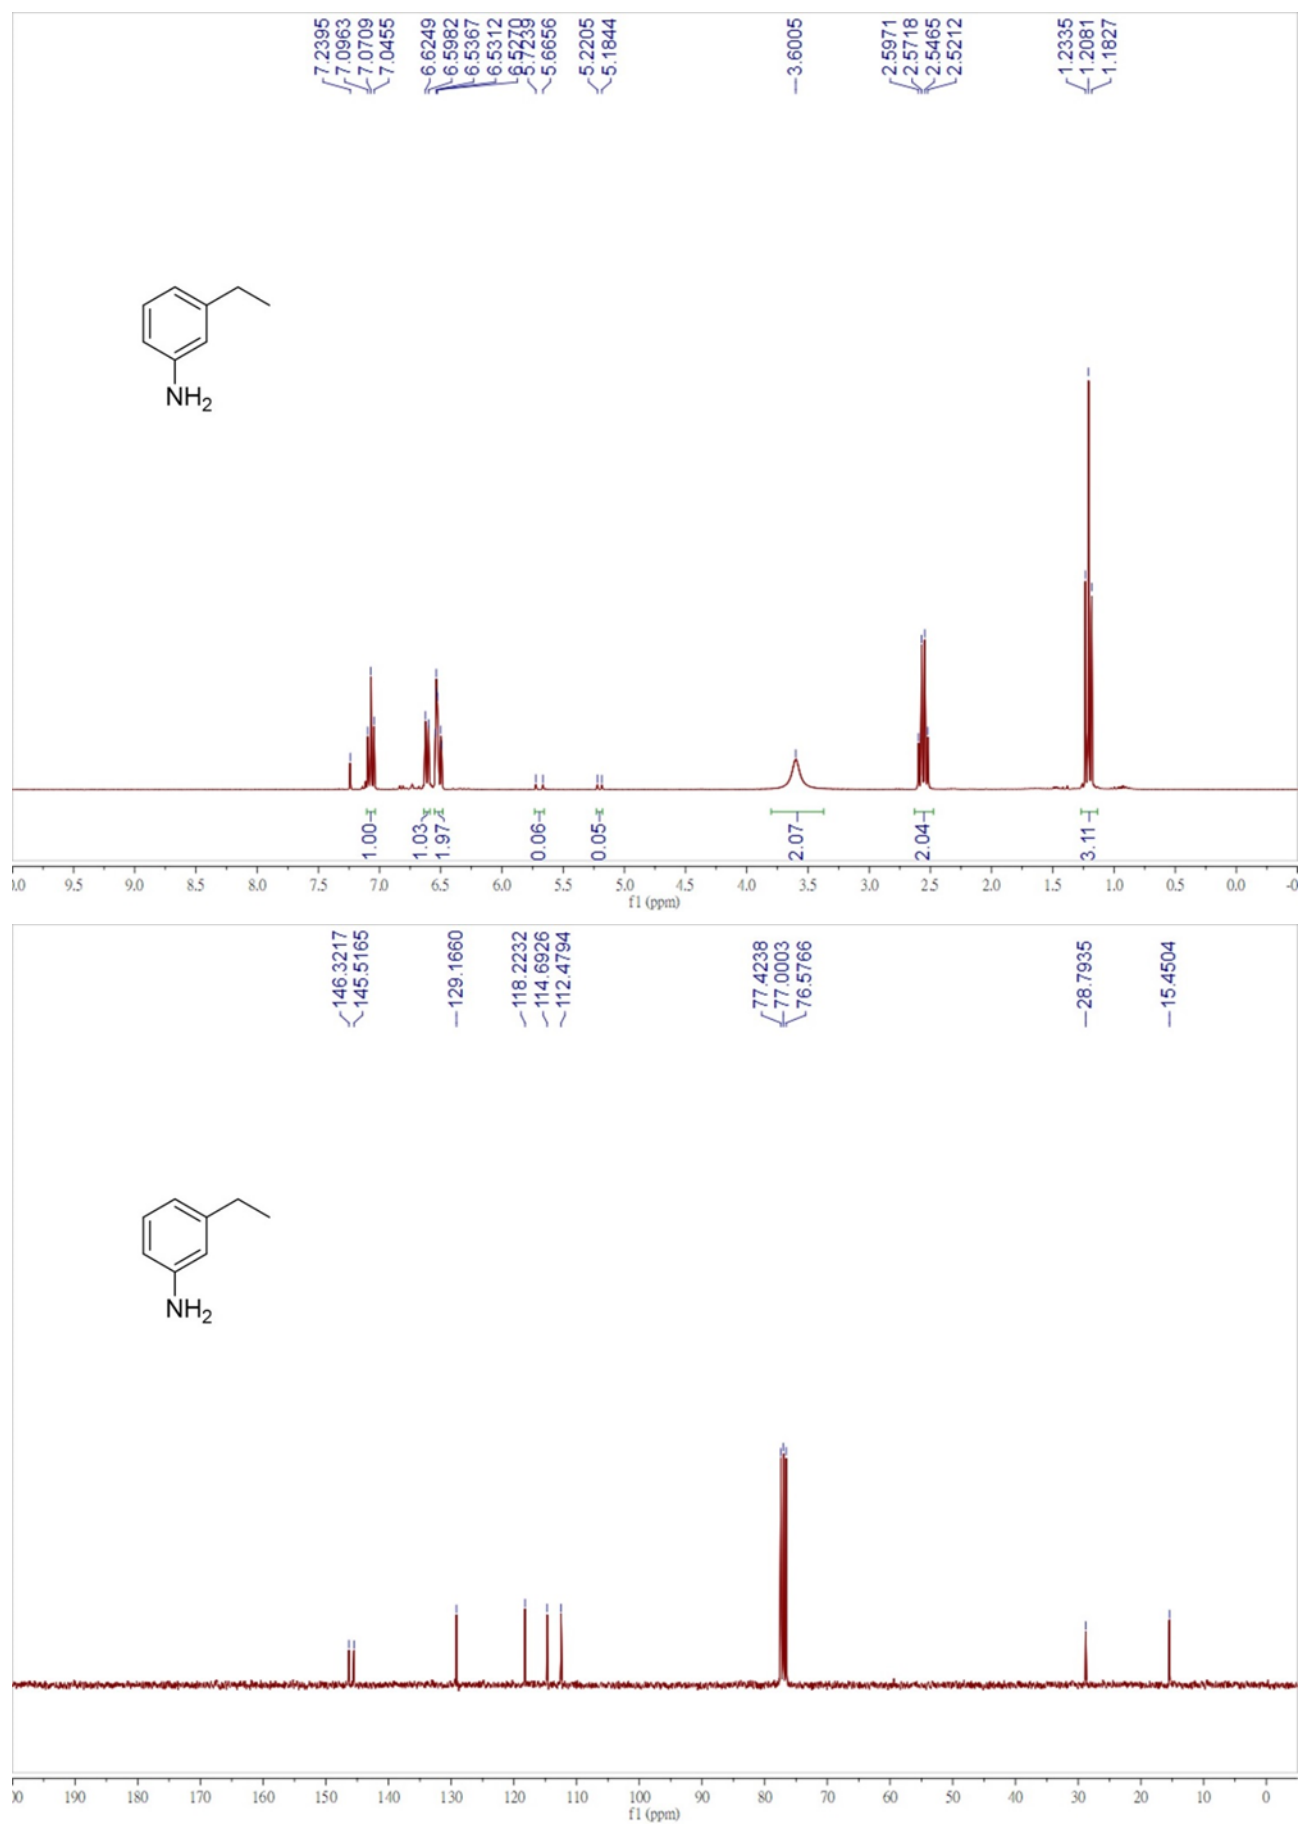



<sup>1</sup>H NMR spectrum of compound **4d**

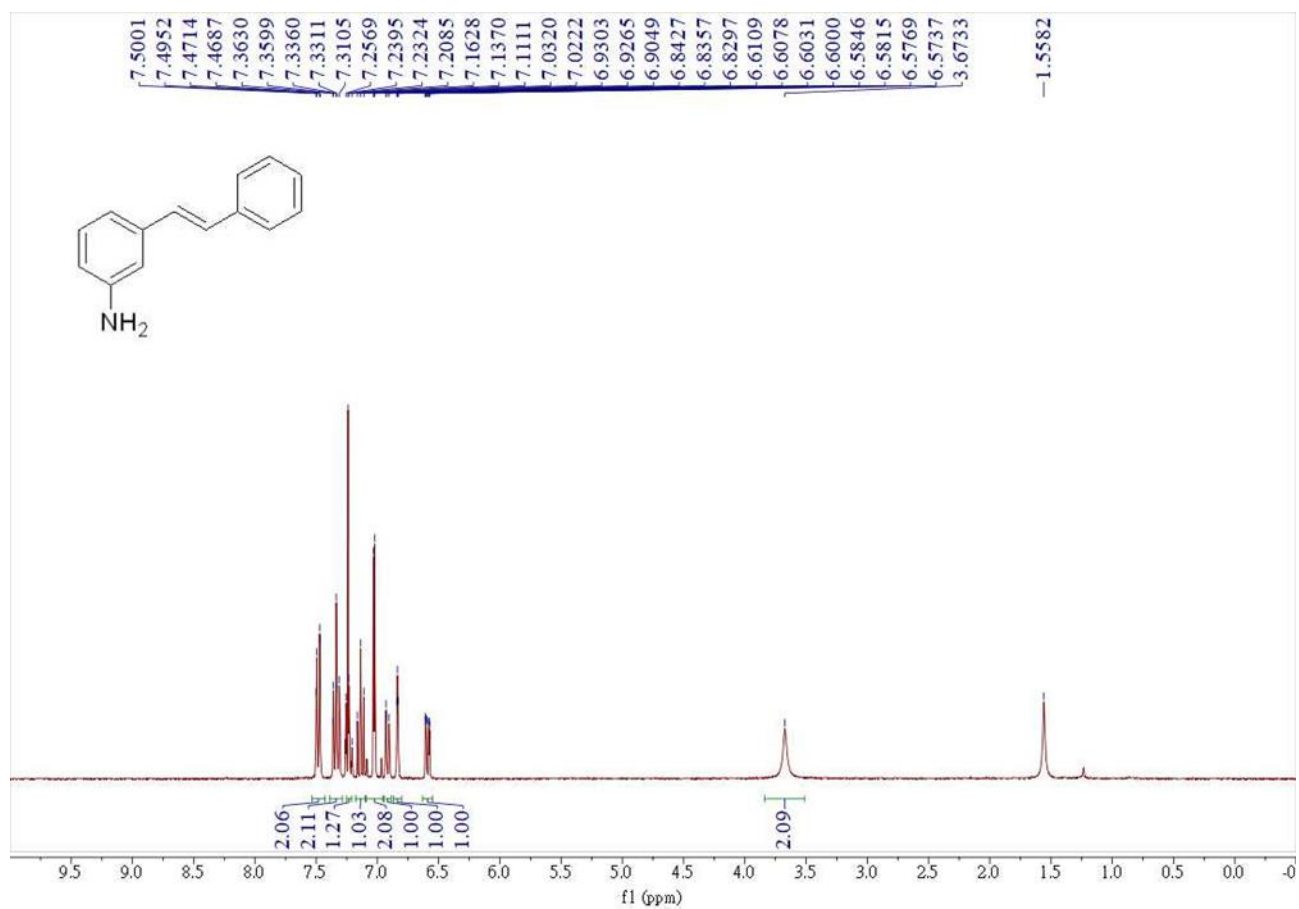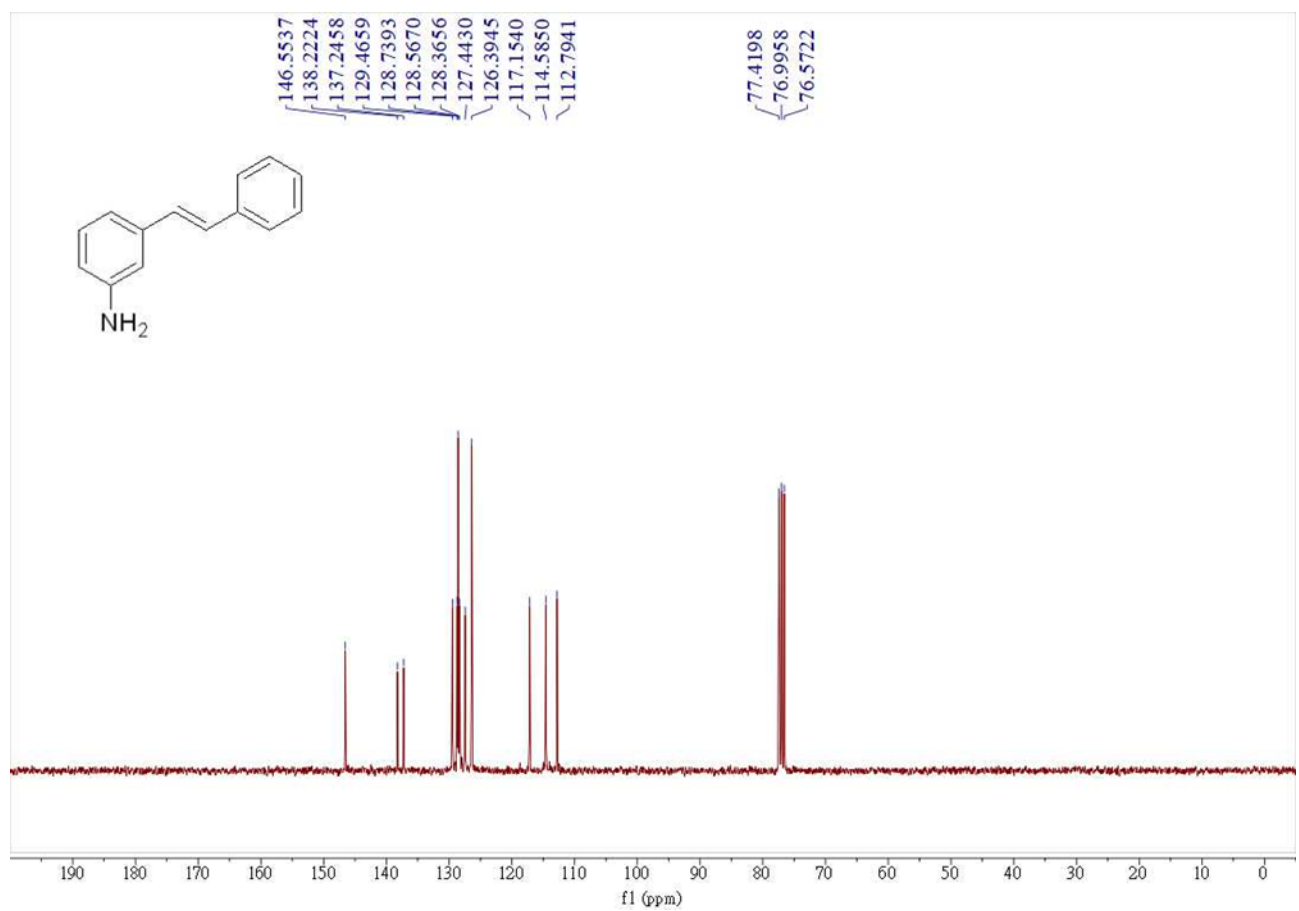

$^1\text{H}$  NMR spectrum of compound **4d'**

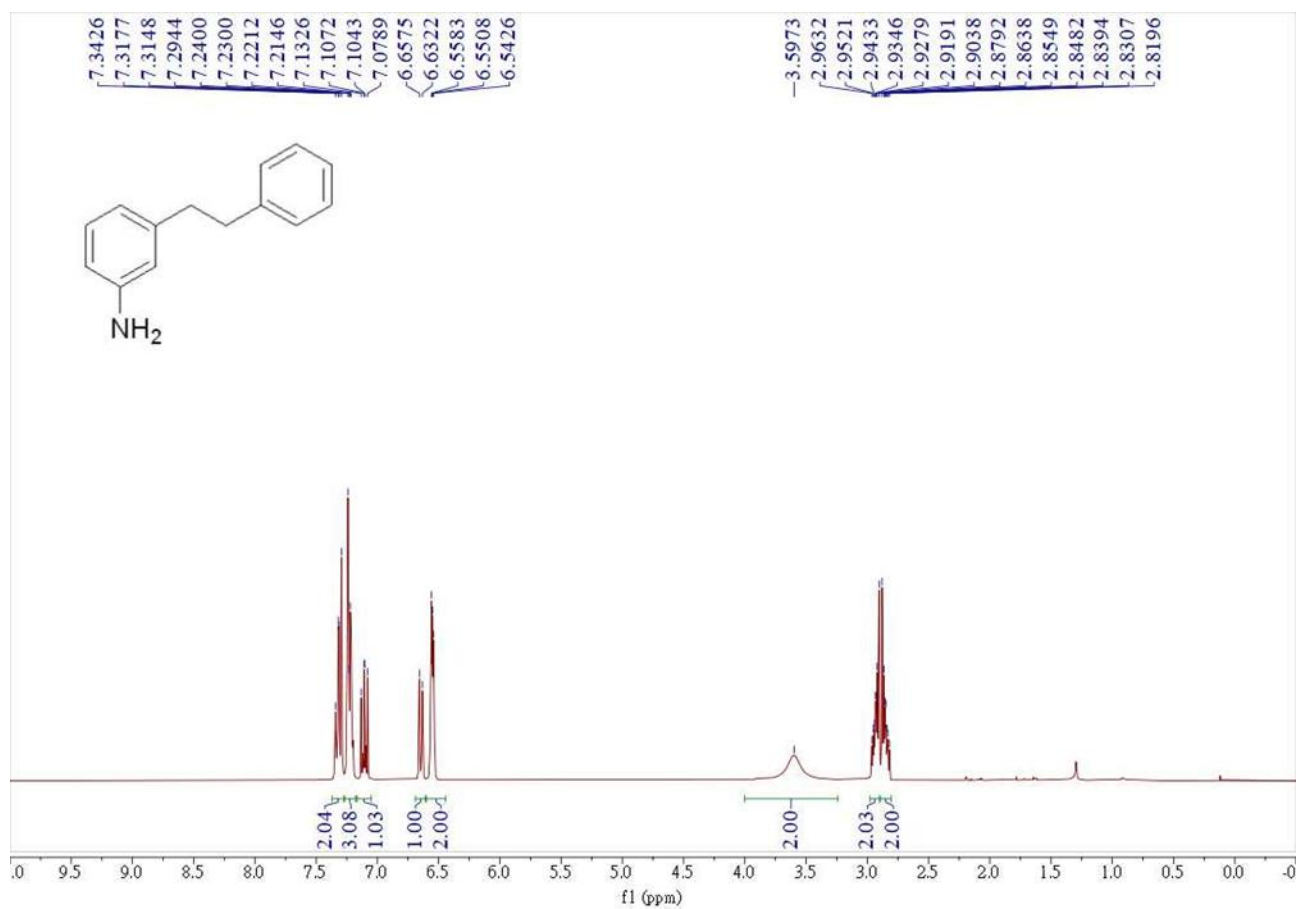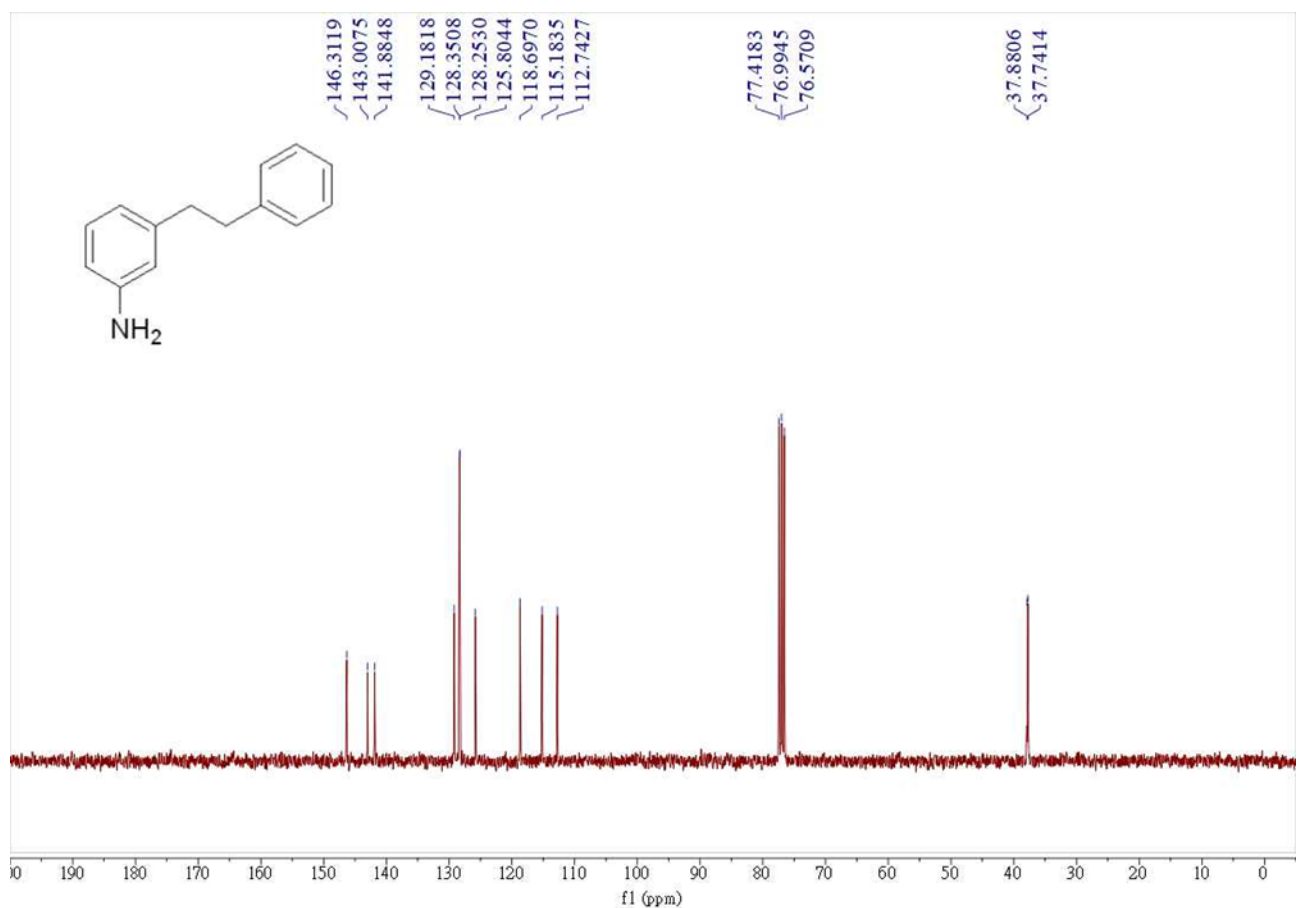

$^1\text{H}$  and  $^{13}\text{C}$  NMR spectra of compound **6a**

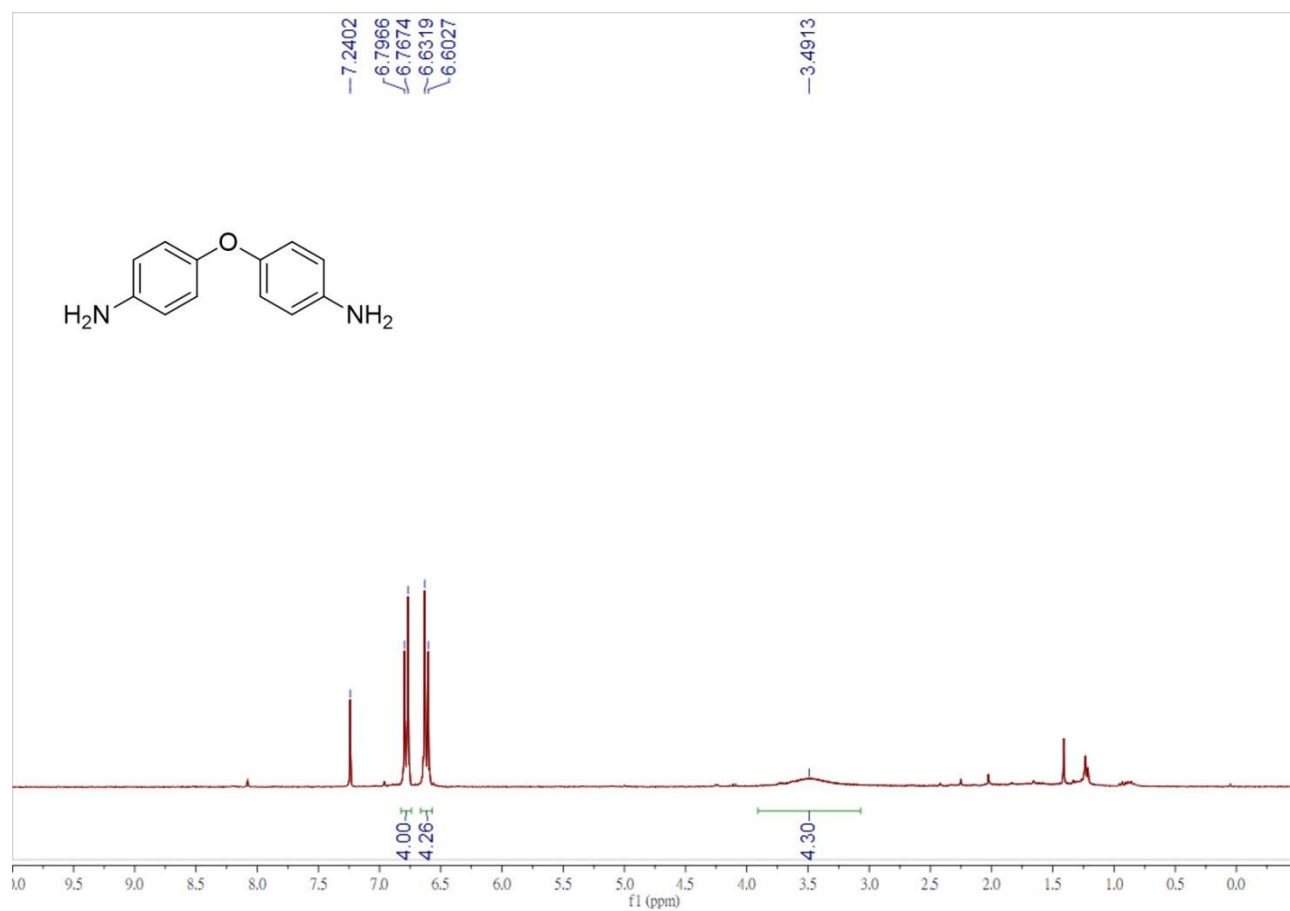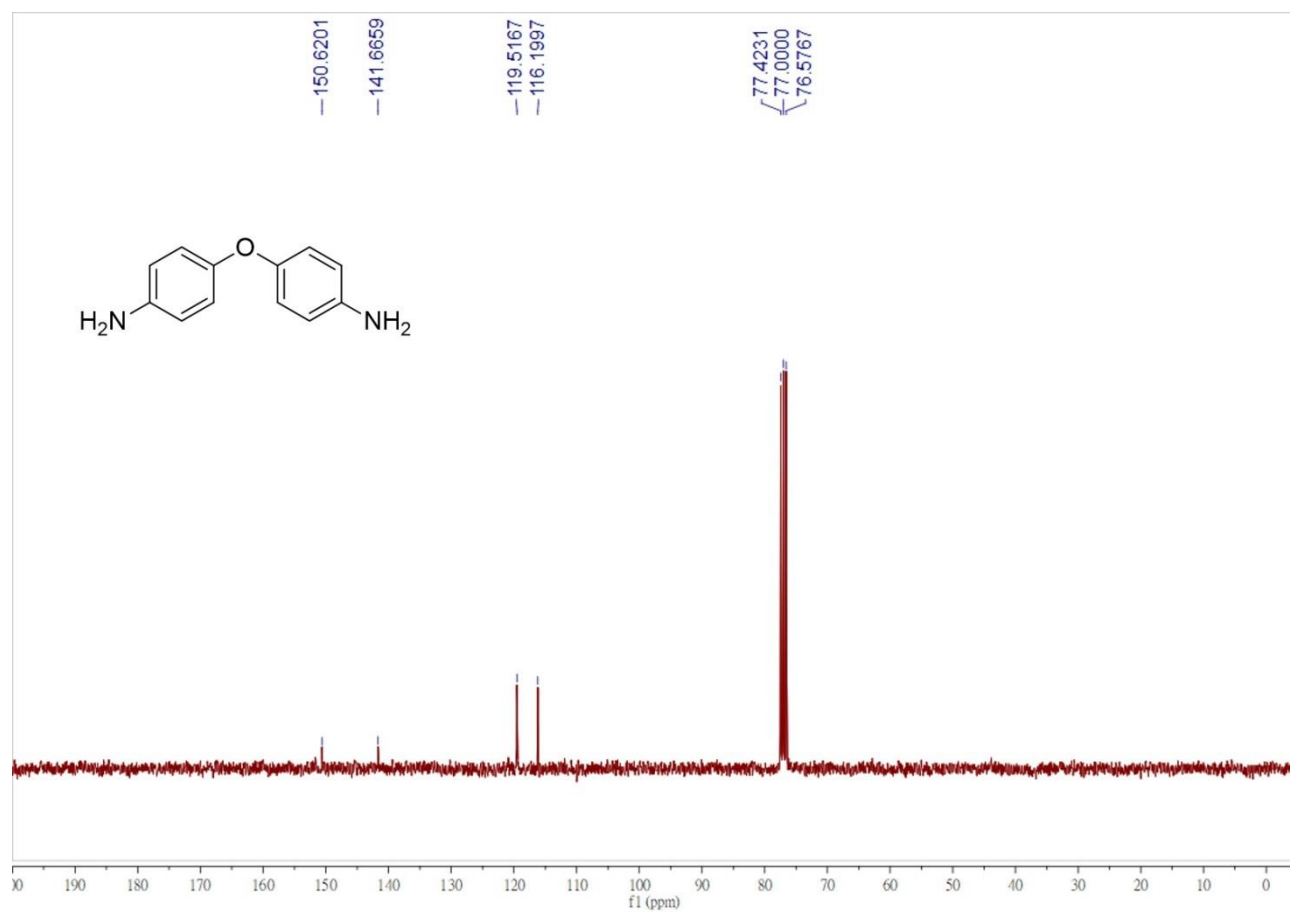

$^1\text{H}$  and  $^{13}\text{C}$  NMR spectra of compound **6b**

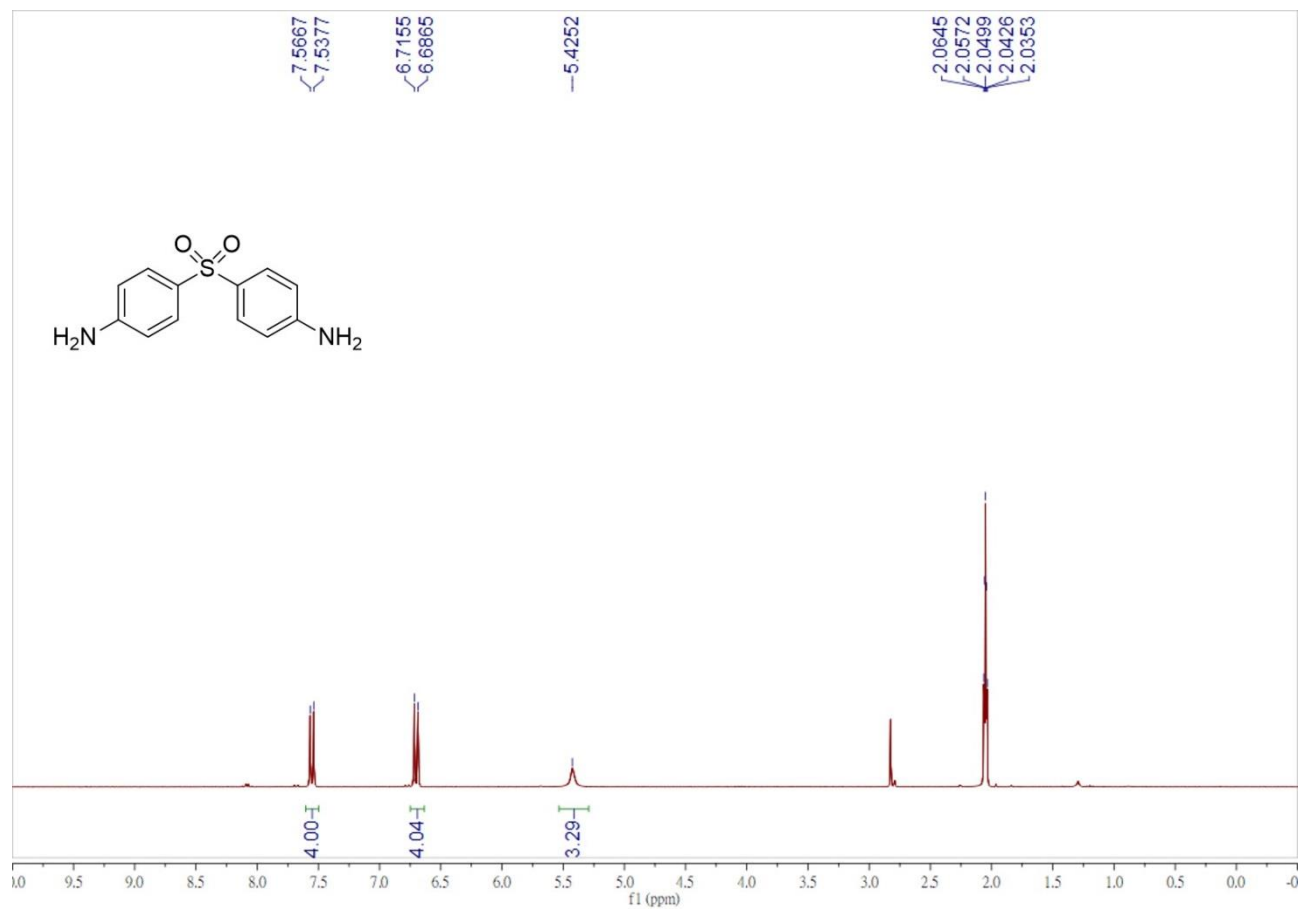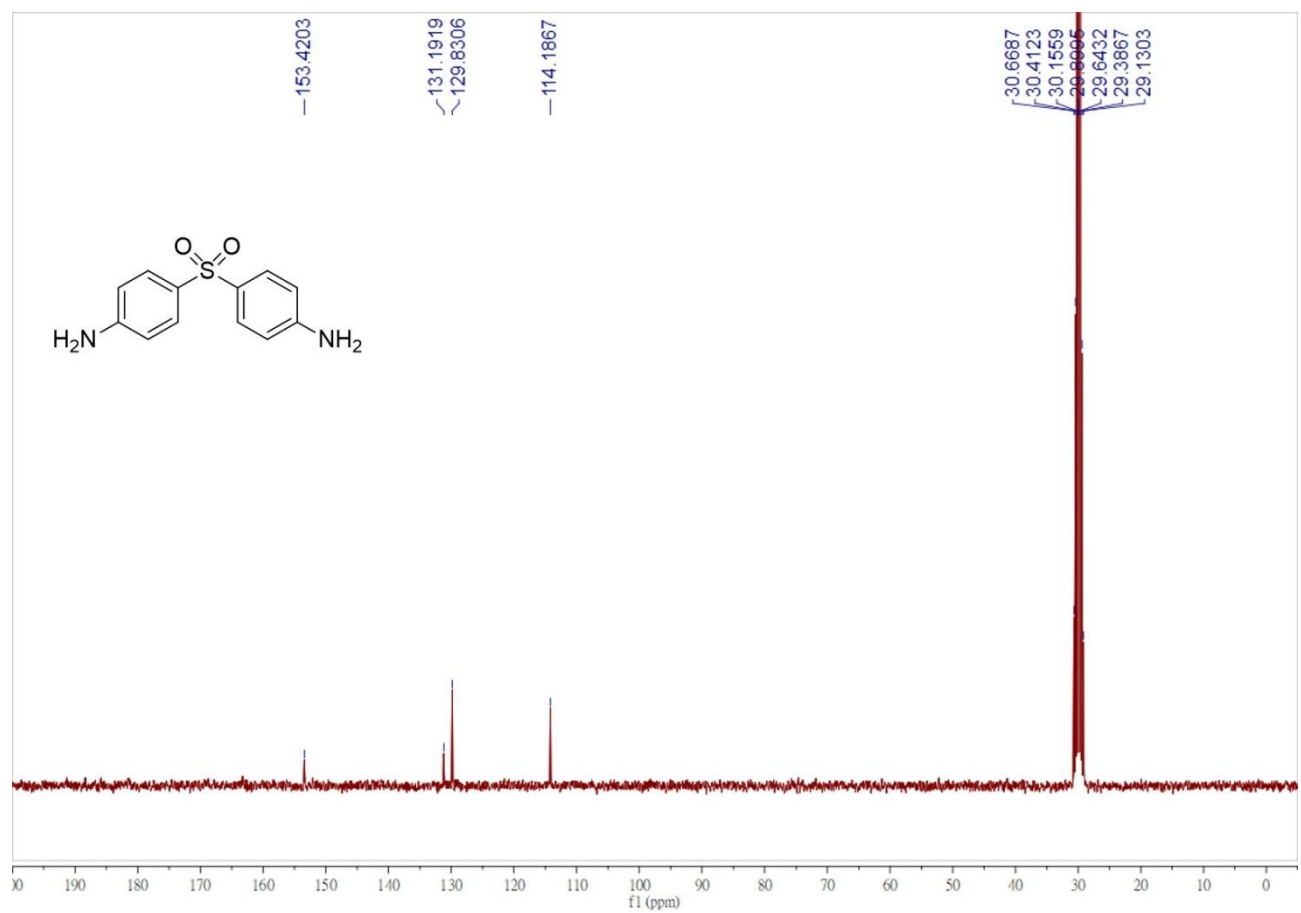

Supplement: s1 [file s1]
